# Supplementary material for: From Cultural Symbols to User Value Construction:A Grounded Theory Study of Heritage-Based Creative Products
Source: Research Square preprint supplement (doi:10.21203/rs.3.rs-8448462/v1), 2026-01-29
Supplement: Supplementary file 1 [file 1ce1aa0bc19ac87e6c783c57.docx]

**Basic Information of Interviewing Cultural and Creative Designers and Practitioners and Summary of Interviewing Content**

**I. Overview of Basic Information of Cultural and Creative Designers and Practitioners**

| Information Summary of Cultural and Creative Designers and Practitioners | | | | |
| --- | --- | --- | --- | --- |
| order number | Gender | age | occupation | Interview duration (minutes) |
| Visitor 1 | Male | 31 | Creative Designer | 28 |
| Visitor 2 | Female | 27 | Cultural and creative industry professionals | 26 |
| Visitor 3 | Male | 38 | Creative Designer | 30 |
| Visitor 4 | Male | 29 | Cultural and creative industry professionals | 22 |
| Visitor 5 | Female | 33 | Creative Designer | 27 |
| Visitor 6 | Male | 26 | Cultural and creative industry professionals | 18 |
| Visitor 7 | Male | 31 | Creative Designer | 24 |
| Visitor 8 | Male | 27 | Cultural and creative industry professionals | 20 |

**II. Interviewing Cultural and Creative Designers and Practitioners: Outline Summary**

1. In designing cultural and creative products inspired by Fuxi's philosophy, which core cultural symbols would you prioritize, and what criteria guide your selection?

2. What is the design logic you followed in transforming Fuxi's cultural symbols into user value for cultural and creative products?

3. How can we use cultural translation to make the essence of Fuxi culture resonate with users in cultural and creative products?

4. When designing Fuxi-themed cultural and creative products, how would you structure a narrative framework to convey its symbolic significance?

5. In your opinion, what are the key dimensions of user value in Fuxi-themed cultural and creative products?

6. How can grounded theory specifically assist design work in mapping the relationship between Fuxi cultural symbols and user value?

7. How do you strike a balance between the authenticity of Fuxi culture and the commercial viability and practicality of cultural and creative products during the design process?

**III. Interviewing Cultural and Creative Designers and Practitioners: Compilation of Original Materials for Outline Responses**

**Visitor 1:**

We selected core symbols like the Fuxi Eight Trigrams and dragon totems, as they serve as the most recognizable visual identifiers of Fuxi culture, allowing users to instantly connect with its essence. During translation, the trigram patterns are simplified into geometric motifs applied to stationery and accessories. The design follows a three-step logic: 'symbol extraction → simplified reconstruction → product adaptation,' preserving cultural significance while aligning with modern aesthetics. This approach enables users to intuitively experience the mystique and wisdom of Fuxi culture, embodying the user value at the cultural experience level. Grounded theory helps me identify the cultural symbols and needs that truly resonate with users, ensuring designs remain user-centric.

**Visitor 2:**

I will first explore the cultural essence of Fuxi's "world creation and moral education," then select symbols like the River Chart (Hetu), Luo Book (Luoshu), and the Fuxi-Nüwa Diagram. The translation will adopt a storytelling approach—such as illustrating the legend of Fuxi's hexagram creation in a notebook, structured along the narrative thread of "origin, development, and significance." Beyond cultural experience, the product offers collectible and practical value, like a cultural gift box that serves as both a present and keepsake. To balance authenticity and commercial appeal, core symbols will retain traditional forms while incorporating market-oriented materials and functions. For example, using eco-friendly resin for Bagua figurines ensures cultural relevance and practicality.

**Visitor 3:**

The design prioritizes Fuxi's cultural symbols as the "ancestral figure of human civilization," featuring iconic imagery like his creation of writing systems and knot-tying for record-keeping. The methodology begins with grounded theory analysis of user interviews to identify cultural identity and emotional needs, then translates these into tangible products. For example, knot-tying symbols are crafted into bracelets using traditional weaving techniques to recreate their form while imbuing them with auspicious symbolism. Grounded theory enables me to derive symbolic value from user perspectives, avoiding self-indulgent designs while clearly mapping the transformation from symbols to user value.

**Visitor 4:**

Symbols like the Bagua Formation and gourd are adapted into modern products. For example, the Bagua Formation's layout is transformed into a board game, allowing users to explore the logical thinking of Fuxi culture through play. The narrative is simplified into a concise story: "Fuxi created the Bagua and established the cosmic order," printed on product packaging. User value lies in entertainment and knowledge acquisition, particularly for young users who engage with traditional culture through interactive products. Balancing authenticity and commercial appeal involves preserving core cultural symbols without radical changes, while aligning product features and aesthetics with mainstream market preferences and user habits.

**Visitor 5:**

I focus on the "harmony and nature" essence in Fuxi culture, selecting the symbolic scene of Fuxi observing the sky and earth. The translation approach combines illustrations and scenario-based design—such as transforming the star-observing scene into a canvas bag pattern—following the logic of "essence extraction → visual concretization → product implementation." User value stems from emotional resonance, as modern consumers seek inner peace, and this cultural essence resonates with their emotional needs. Grounded in theory, I identified users' demand for "cultural healing," enabling more targeted design and systematically mapping the narrative logic of symbols.

**Visitor 6:**

The core design revolves around Bagua symbols and the legendary figure of Fuxi. During translation, abstract treatments are applied—such as transforming Bagua lines into lamp silhouettes, where light filtering through the lines creates Bagua projections. The design logic follows: "symbolic visualization → artistic lighting → product innovation." The narrative avoids complex storytelling, using simple text to annotate symbols' cultural meanings, allowing users to perceive culture through visual and experiential engagement. User value includes aesthetic appeal and ambiance creation, making it ideal for home environments. Grounded theory helps distinguish symbols with high user recognition from those requiring additional interpretation, thereby optimizing design interpretation costs.

**Visitor 7:**

The design adopts symbols of Fuxi's (the legendary Chinese farmer) invention of fishing and hunting tools, such as the plow and fishing nets, simplifying their forms into tableware and storage racks. The design logic follows the principle of "cultural function → modern function → symbolic fusion." The narrative emphasizes Fuxi's contributions to "improving people's livelihood," conveying cultural values of practicality and innovation. User value primarily includes practical utility and cultural-educational significance, allowing daily use to understand Fuxi's historical achievements. Grounded theory helps me filter cultural symbols that align with user needs, transforming cultural products from mere "decorative items" into functional objects that truly integrate into daily life.

**Visitor 8:**

The design integrates dragon totems and Bagua symbols, crafted as metal relief bookmarks through a three-step process: symbolic combination → craft empowerment → cultural refinement. Drawing from the legend of "Fuxi Subduing the Dragon and Establishing the Nine Provinces," these symbols are imbued with narrative depth. The bookmarks serve as cultural artifacts, offering both collectible value and cultural heritage significance, making them ideal for students and enthusiasts. Grounded in ethnographic theory, the research reveals distinct preferences: students favor minimalist designs, while collectors prioritize intricate craftsmanship and detailed craftsmanship, enabling targeted design differentiation.
