# Supplementary material for: From Cultural Symbols to User Value Construction:A Grounded Theory Study of Heritage-Based Creative Products
Source: Research Square preprint supplement (doi:10.21203/rs.3.rs-8448462/v1), 2026-01-29
Supplement: Supplementary file 2 [file 323712bae2f8bb54843a267c.docx]

**Rooted Theory Coding Manual**

**From Cultural Symbols to User Value Structure: Research on Cultural Heritage Creative Products Based on Grounded Theory**

I. General Principles of Coding

1. The principle of continuous comparison: constantly compare data with data, concepts with concepts, and concepts with categories to identify similarities and differences, and extract attributes.

2. Principle of theoretical sensitivity: Maintain theoretical insight into literature and practical issues, yet avoid preconceptions, allowing theories to emerge naturally from data.

3. Combining line-by-line coding with holistic comprehension: paying attention to both details and the overall context and narrative logic of the interview text.

4. Context Preservation Principle: When distilling concepts, preserve the core context and semantics of the original statement to prevent distortion caused by excessive abstraction.

II. Open Coding

1. Purpose: To break down the raw data, assign labels to phenomena, and conduct preliminary conceptualization and categorization.

2. Process:

Data preparation: Transcribe interview recordings into transcripts and import them into qualitative analysis software (e.g., NVivo) or documents for management.

Tag: Name each sentence, paragraph, or meaningful data unit with a short "phenomenon tag".

Example (original sentence): "The moment I saw that cultural bookmark with the八卦 motif, I knew it was 'authentic' —like it instantly transported me to the majestic Taihao Mausoleum."

Phenomenon label: Visual symbols evoke scene associations.

Conceptualization: Grouping similar or related labels to form preliminary concepts.

For example, by grouping tags like 'visual symbols evoke scene associations,' 'patterns remind me of festivals,' and 'colors carry an ancient charm,' we can form the concept of 'cultural authenticity perception of symbols.'

Category: the related concepts are further abstracted and integrated into higher-level "category", and its attributes and dimensions are defined.

The example: The concept of "cultural authenticity perception" is formed by integrating the concepts of "cultural authenticity perception of symbols", "knowledge credibility of narrative content", "traditional sense of material craft", etc. The attributes of "cultural authenticity perception" can include: symbol accuracy, historical relevance, narrative integrity, etc.

3. Spindle-type encoding

1. Purpose: To discover and establish logical connections between categories, forming primary and secondary categories.

2. Process: Using paradigm models, focus on a specific phenomenon to identify:

Causal condition: the situation or factor that leads to the occurrence of the phenomenon.

Phenomenon: The central idea of a core event or problem.

Context: the specific background of the phenomenon.

Intervention condition: the structural condition that affects the action strategy.

Action/Interaction strategy: The specific actions taken to address a phenomenon.

Results: The consequences of action/interaction.

3. Example (fragment):

Core phenomenon: Users develop emotional resonance with cultural and creative products.

The causal condition is that the product design arouses the collective memory of Fuxi culture or the personal cultural identity of the users.

Context: After visiting the Taihao Mausoleum, users purchase cultural and creative products as souvenirs or gifts for others.

Intervention conditions: aesthetic quality, price, and practicality of the product.

Action strategy: Users purchase, save, display, and share on social media.

Results:The students got emotional satisfaction and social expression, and their cultural identity was strengthened.

The main category formed is emotional value (which is supported by the subcategories of emotional resonance and emotional satisfaction).

IV. Selective Coding

1. Purpose: To systematically select a core category from all discovered main categories and connect it with other categories to form a complete theoretical storyline.

2. Process:

Identifying core categories: Through repeated comparisons, we seek categories that are frequently encountered, strongly interconnected, and capable of explaining most research questions. In this study, the core category is "user value perception structure".

The storyline revolves around the core category, integrating relationships established through the mainline coding to form a coherent theoretical narrative.

Example narrative: Cultural symbols are transformed through design (causal condition), resulting in cultural and creative products that evoke users' perception of cultural authenticity and emotional resonance (phenomenon). Within specific consumption and usage contexts (context), influenced by product functionality and aesthetic quality (intervention conditions), users ultimately achieve integrated satisfaction of emotional, social, and functional values through purchasing, using, and sharing (action strategies). These three elements collectively form the core value perception structure of users regarding cultural heritage creative products.

Theoretical saturation test: When new interview data can no longer generate new concepts, categories, or relationships, and existing theories can fully explain the data, the coding process should be stopped.

V. Coding Records and Audit

1. Maintain a coding log: document the rationale, date, and reflections for each significant coding decision.

2. Team coding and discussion: Two or more researchers independently code selected texts, resolve discrepancies through discussion, and enhance reliability.

3. Software-assisted analysis: Utilize node, query, and modeling features in software like NVivo to visualize coding structures.
