# Supplementary material for: From Cultural Symbols to User Value Construction:A Grounded Theory Study of Heritage-Based Creative Products
Source: Research Square preprint supplement (doi:10.21203/rs.3.rs-8448462/v1), 2026-01-29
Supplement: Supplementary file 3 [file 516d10f531431f217479ee56.docx]

**Interviewing Cultural Experts and Intangible Cultural Heritage Scholars:Summary of Basic Information and Interview Content**

**A Table of Basic Information of Cultural Experts and Intangible Cultural Heritage Scholars**

| Information Summary of Cultural and Creative Designers and Practitioners | | | | |
| --- | --- | --- | --- | --- |
| order number | Gender | age | status | Interview duration (minutes) |
| Visitor 1 | Male | 47 | Expert in the study of Fuxi culture | 30 |
| Visitor 2 | Female | 55 | Scholars of intangible cultural heritage protection | 45 |
| Visitor 3 | Male | 59 | Local cultural studies expert | 40 |
| Visitor 4 | Female | 40 | Scholars studying the cultural and creative industries | 30 |
| Visitor 5 | Male | 48 | Fuxi Cultural Intangible Heritage Inheritors | 31 |
| Visitor 6 | Male | 52 | historical and cultural scholar | 29 |
| Visitor 7 | Female | 57 | Folk Culture Expert | 28 |
| Visitor 8 | Male | 41 | Cultural Heritage Planning Expert | 35 |
| Visitor 9 | Male | 50 | Scholars of Fuxi Culture | 45 |
| Visitor 10 | Female | 44 | Scholars of intangible cultural heritage education | 46 |
| Visitor 11 | Male | 49 | Expert from the Local Intangible Cultural Heritage Protection Center | 24 |

**II. Interviewing Cultural Experts and Intangible Cultural Heritage Scholars: Outline Summary**

1. From an academic perspective, what are the core aspects of Fuxi culture? What are the corresponding cultural symbols and their original meanings?

2. In the process of transforming Fuxi cultural symbols into cultural and creative products, which symbols do you think are most likely to retain their cultural authenticity, and which symbols face the greatest challenges in translation? What are the reasons for this?

3. How to strike a balance between historical authenticity and contemporary users' aesthetic preferences and cognitive patterns when developing the narrative framework for Fuxi cultural creative products? Which narrative approach would you recommend?

4. How do you think the symbolic meaning of Fuxi culture contributes to the user value of cultural and creative products, such as cultural identity, emotional attachment, and knowledge acquisition?

5. How can we effectively communicate the abstract concepts in Fuxi culture (e.g., "harmony between heaven and humanity" and "yin-yang interdependence") to users through a combination of symbolic visualization and narrative contextualization, enabling them to perceive and embrace these values?

6. From the perspective of grounded theory research, what core dimensions do you believe should be included in the user value structure of Fuxi cultural and creative products? How are these dimensions related to cultural symbols and narrative construction?

7. In practice, what do you think are the most common pitfalls for cultural and creative professionals when extracting Fuxi cultural symbols and constructing narratives? How can they avoid these pitfalls to ensure accurate cultural dissemination?

**III. Interviewing Cultural Experts and Intangible Cultural Heritage Scholars for the Outline of Answers to the Original Materials**

**Visitor 1:**

Let's first examine the core essence of Fuxi culture, which scholars typically categorize into three dimensions: cosmic origin exploration, humanistic civilization enlightenment, and ethical order construction. The symbolic representations are distinctly clear: the Bagua diagram embodies the cosmological worldview, knot-tying for record-keeping symbolizes the dawn of civilization, while the Fuxi-Nüwa mating image represents life reproduction and ethical order. These symbols' original meanings encapsulate ancient people's understanding of nature and society. When adapting these symbols, preserving the Bagua diagram's authenticity proves most crucial—its minimalist design ensures universal recognition, regardless of creative adaptations. The real challenge lies with knot-tying for record-keeping, as it functions not as a static image but a behavioral symbol. Transforming this action into tangible products often results in confusion for users.

**Visitor 2:**

I prefer to interpret the core essence of Fuxi culture through two dimensions: "life" and "wisdom." The life dimension reflects his role as the cultural progenitor who nurtured the descendants of Huaxia, symbolized by the gourd and dragon totem. The wisdom dimension encompasses his creation of the Eight Trigrams and the earliest written symbols, represented by the trigrams and primitive characters. When translating these concepts, the gourd—a tangible symbol—easily retains its authenticity, making it suitable for decorative items or tea sets, as users instantly recognize it as a symbol of good fortune. The challenge lies in symbolizing abstract concepts like "yin-yang interdependence." You can't simply draw a yin-yang fish; the user must understand the underlying cosmological philosophy. In narrative, balancing historical accuracy with modern aesthetics requires adhering to the principle of "truth in major events, flexibility in minor details." For instance, when recounting Fuxi's creation of the trigrams, the historical context must be accurate, but it can be presented through modern illustrations to make it more accessible to younger audiences.

**Visitor 3:**

The essence of Fuxi culture, broadly speaking, represents the "origin of Chinese civilization that created heaven and earth." Specifically, it can be broken down into three components: natural cognition through observing celestial patterns, agricultural wisdom for cultivating crops, and social norms through ritual systems and musical traditions. Corresponding symbols include: the Eight Trigrams and astronomical observatories for celestial observation; farming tools like plows and fishing nets for agricultural practices; and tribal totems and ritual jade artifacts for social governance. Symbols play a pivotal role in user value. Users primarily recognize culture through symbols—seeing the Eight Trigrams, for instance, evokes associations with Fuxi's wisdom, marking the beginning of cultural identification. When symbols are effectively translated, users subconsciously absorb cultural influence through cultural and creative products, embodying the dual value of emotional attachment and knowledge acquisition. Rooted in grounded theory, user value structures should encompass three dimensions: cultural cognition, emotional experience, and practical functionality. Cultural symbols serve as the foundation, while narrative construction acts as the bridge. Without symbols, narratives lose their carriers; without narratives, symbols remain mere graphics.

**Visitor 4:**

From an academic perspective, the cultural essence of Fuxi can be divided into spiritual core and practical achievements: the spiritual core embodies the cosmology of "harmony between heaven and humanity," while practical achievements include civilizational innovations such as fishing, hunting, agriculture, and writing. Corresponding symbols include the Eight Trigrams and the River Chart and Luo Book for the spiritual core, while the Leisi plow and knot-tying for practical achievements. The key to translating abstract concepts lies in "concretizing symbols + contextualizing narratives." For example, regarding "harmony between heaven and humanity," you could combine the Eight Trigrams with natural landscapes to create an illustration printed on a canvas bag, accompanied by a concise narrative: "Fuxi observed the celestial patterns and drew the Eight Trigrams to bridge heaven and humanity." This allows users to understand the abstract concept through visual and textual interpretation. The most common pitfall for practitioners is over-commercialization—distorting symbols beyond recognition for aesthetic appeal, such as twisting the Eight Trigrams 'lines into bizarre shapes that users cannot recognize, thereby losing the purpose of cultural dissemination. To avoid this, it's essential to establish a "authenticity database" of cultural symbols, where practitioners consult experts like us before translation to verify authenticity.

**Visitor 5:**

As an intangible cultural heritage practitioner, I prioritize both "transmission" and "practicality" in Fuxi culture. Transmission ensures the cultural spirit endures, while practicality means its creations serve daily life. For symbolic representation, I use Bagua (the Eight Trigrams) and dragon totems for cultural transmission, and fishing nets and fire symbols for practicality. When crafting narratives, I recommend the "inheritor's perspective." For example, when sharing fishing net stories, I might combine my woven techniques: "Fuxi taught people how to weave nets for fishing and hunting. Today, we craft cultural fishing net ornaments using this skill—both honoring our ancestors and preserving the craft." This approach makes the story more authentic and resonant. Symbolic translation proves most challenging with fire symbols. As abstract concepts, they require creative adaptations like transforming them into lamps where light symbolizes fire, demanding practitioners' profound cultural understanding.

**Visitor 6:**

The core essence of Fuxi culture constitutes the "cultural DNA" of the Chinese nation, encompassing three fundamental elements: the cosmic cognitive gene represented by the Eight Trigrams, the life-generating gene embodied in the Fuxi-Nüwa myth, and the cultural innovation gene manifested through writing and musical instruments. From the perspective of grounded theory, the core dimensions of user value structure should include cultural identity, historical education, and aesthetic experience. Cultural symbols and narrative construction exert the greatest influence on cultural identity, as symbols serve as cultural markers while narratives tell cultural stories. Users develop identification with Fuxi culture through these symbolic and narrative elements. A common translation bias is "literal interpretation," such as simplistically equating Fuxi's "dragon totem" with a mere dragon, overlooking its profound significance as a symbol of the Chinese national community. This results in cultural products that merely resemble ordinary dragon figurines devoid of cultural depth. To mitigate this, practitioners must undergo enhanced cultural training to thoroughly understand the original meanings of these symbols.

**Visitor 7:**

From a folkloric perspective, the essence of Fuxi culture primarily manifests in "auspicious blessings" and "life wisdom." The symbolic elements of auspicious blessings include gourds and the Eight Trigrams, while life wisdom is embodied in knot-tying for record-keeping and farming tools like plows. To balance historical authenticity with contemporary aesthetics, a narrative approach combining "folklore stories with modern reinterpretations" can be adopted. For instance, the folk tale of the gourd tells how "Fuxi and Nuwa used gourds as boats to escape floods," while modern reinterpretations might transform gourds into aromatic incense burners. This allows users to experience both auspicious symbolism and modern comforts. The symbolic value primarily serves emotional attachment—for example, when purchasing a Bagua pendant, people seek blessings rather than studying cosmology, demonstrating emotional value. Abstract concepts like "yin-yang interdependence" can be translated into fashion designs. A black-and-white fabric patch on a top, symbolizing yin and yang, paired with a simple narrative, enables users to visually grasp this concept.

**Visitor 8:**

The essence of Fuxi culture, as the "origin of Chinese civilization," encompasses three dimensions: natural exploration, cultural innovation, and social organization. Its symbolic representations include the Eight Trigrams and the River Chart-Luo Book for natural exploration; writing and musical instruments for cultural innovation; and tribal totems and ritual systems for social organization. From a grounded theory perspective, the core dimensions of user value structure should include cultural cognition, emotional engagement, practical utility, and collectible value. The relationship between these dimensions and cultural symbols/narrative construction is as follows: Cultural symbols form the foundation, determining the cultural attributes of user value; narrative construction serves as an enhancement, adding emotional and educational dimensions. The River Chart-Luo Book poses the greatest translation challenge due to its intricate graphics and abstract original meaning. Practitioners often face dilemmas: either overcomplicating it to obscure its meaning or oversimplifying it, thereby losing its authenticity.

**Visitor 9:**

After studying Fuxi culture for so many years, its core essence can be summed up in two words: "origin," referring to the origin of Chinese culture. Corresponding symbols that represent this origin include the Eight Trigrams, which are the origin of China's philosophy; knot-tying for record-keeping, which is the origin of China's writing; and the dragon totem, which is the origin of the Chinese nation. When transforming symbols into cultural and creative products, the most authentic one to preserve is the Eight Trigrams, as its graphic form is fixed and its meaning clear. No matter how it is interpreted, as long as the core structure remains unchanged, it won't deviate. The most challenging is the scene symbol of "Fuxi drawing the trigrams," because it is a dynamic scene rather than a static image, making it difficult to convert into a specific product form. The most common deviation among practitioners is "over-innovation," where they pursue fashion at the expense of the symbols' authenticity, resulting in cultural and creative products that lack the recognizability of Fuxi culture, thereby contradicting the original intent of cultural dissemination.

**Visitor 10:**

The essence of Fuxi culture lies in its dual focus on "education" and "enlightenment" – the cultural mentorship he provided to the descendants of Huaxia civilization. Symbolically, this manifests through knot-tying records and proto-writing systems for education, while the Eight Trigrams and astronomical observatories represent enlightenment. Abstract concepts like "harmony between heaven and humanity" can be visualized through "symbol + game" approaches. For instance, designing an Eight Trigrams puzzle where each piece features natural landscapes allows users to experience the fusion of nature and culture through gameplay – a vivid demonstration of narrative scenarization. From grounded theory perspective, the core dimensions of user value structure should encompass knowledge acquisition, emotional engagement, and social interaction. These dimensions are most closely linked to cultural symbols and narrative construction, as compelling narratives naturally guide users to explore cultural symbols, gain knowledge, develop emotional connections, and even share experiences with friends, thereby fostering social interactions.

**Visitor 11:**

The essence of Fuxi culture, when integrated with local practices, serves as both a "cultural identity bond" and a "driving force for regional development." Corresponding symbols include the Bagua (Eight Trigrams) and dragon totem for cultural identity, while the Fuxi Temple and sacrificial rituals represent local development. These symbols primarily enhance user value through cultural identity and regional belonging. For instance, local residents who encounter Fuxi-themed cultural products develop a strong sense of place, while visitors gain insights into Chinese civilization through these items, fostering recognition of Chinese culture. In narrative development, balancing historical authenticity with modern aesthetics requires "respecting history while staying grounded in contemporary life." For example, when recounting Fuxi's sacrificial rituals, historical accuracy must be preserved, yet modern design techniques can be applied to transform ritual symbols into cultural products, allowing people to experience the charm of sacrificial culture in daily life. A common pitfall in translation is "losing touch with local context." Some practitioners, lacking understanding of regional Fuxi cultural characteristics, create products indistinguishable from others, thereby undermining the value of local culture.
