# Supplementary material for: From Cultural Symbols to User Value Construction:A Grounded Theory Study of Heritage-Based Creative Products
Source: Research Square preprint supplement (doi:10.21203/rs.3.rs-8448462/v1), 2026-01-29
Supplement: Supplementary file 4 [file 6431297b3dd6fbecc0d1eb2e.docx]

**Basic Information of Interviewing Tourists and Summary of Interviewing Content**

**I. Overview of Tourist Basic Information**

| Summary of visitor information | | | | |
| --- | --- | --- | --- | --- |
| order number | Gender | age | area | Interview duration (minutes) |
| Visitor 1 | Male | 28 | Kaifeng, Henan | 4 |
| Visitor 2 | Female | 25 | Henan Zhengzhou | 5 |
| Visitor 3 | Female | 22 | Jiangsu Nanjing | 5 |
| Tourist C | Male | 65 | Zhoukou, Henan | 3 |
| Visitor 5 | Female | 63 | Zhoukou, Henan | 3 |
| Visitor 6 | Male | 35 | Shenzhen, Guangdong | 2 |
| Tourist 7 | Female | 40 | Beijing | 5 |
| Tourist 8 | Male | 31 | Seoul, South Korea | 5 |
| Tourist 9 | Male | 19 | Huaiyang, Henan | 4 |
| Visitor 10 | Female | 45 | Xi'an | 3 |
| Tourist 11 | Female | 17 | Huaiyang, Henan | 4 |
| Tourist 12 | Male | 32 | Changsha City of Hunan Province | 4 |
| Visitor 13 | Male | 41 | Tokyo | 5 |
| Visitor 14 | Male | 58 | Tianshui, Gansu | 3 |
| Tourist 15 | Female | 26 | Zhejiang Ningbo | 3 |
| Tourist 16 | Male | 23 | Sichuan Luzhou | 3 |
| Tourist 17 | Female | 76 | Henan Nanyang | 4 |
| Tourist 18 | Male | 29 | Zibo, Shandong | 2 |
| Tourist 19 | Female | 22 | Zhoukou, Henan | 4 |
| Tourist 20 | Female | 55 | Henan Zhengzhou | 4 |
| Tourist 21 | Female | 48 | Luoyang, Henan | 3 |
| Tourist 22 | Male | 28 | Anhui Huangshan | 5 |

**II. Summary of Interviewing Tourists' Outlines**

1. First Encounter and Impressions: When did you first hear about or visit Taihao Mausoleum (Fuxi Culture)? What was the most profound impression or symbol it left on you? (Exploring the initial cultural symbol cognition)
2. Perception of Core Cultural Symbols: After visiting and experiencing, which elements do you think best represent Fuxi culture? Is it the dragon totem, the Eight Trigrams, the mausoleum architecture, or some legend or spirit?
3. Emotional and Spiritual Connection: Does the image of Fuxi as the 'Pioneer of Human Culture' or his creative spirit (such as drawing the Eight Trigrams and organizing weddings) evoke any emotional resonance or spiritual inspiration in you? Could you elaborate on this?
4. Cultural and creative products experience: Have you noticed or purchased any of the cultural and creative products here? Which ones caught your eye? Was it their beauty, practicality, or the stories and meanings behind them that drew you in?
5. Purchase and sharing motivation: If you buy cultural and creative products, is it mainly for personal keepsake or use, or as a gift for a specific person? How would you introduce this gift to your friends?
6. The Ideal Cultural and Creative Product: If you were to design a Fuxi-themed cultural and creative product, what would you choose? What features would you want it to have?
7. Reflections on Cultural Heritage: How can traditional culture like Fuxi's be better understood and embraced by more people, especially the younger generation, through approaches such as tourism, cultural innovation, or education?
8. Summary of the Overall Value: What is the most valuable takeaway from this visit to Taihao Mausoleum? Is it knowledge, an emotional connection, a physical artifact, or an inspiration?

**III. Interviewing Tourists and Summarizing the Original Materials for the Outline**

**Visitor 1:**

1. First Encounter and Impressions: I first heard of Fuxi Culture and Taihao Mausoleum when I was about seven or eight years old, accompanying my grandparents to Huaiyang for a temple fair. The place was packed with people, and the most striking feature was the Bagua Altar in the mausoleum—a large circular platform adorned with a black-and-white Bagua diagram. My grandparents taught me to identify the Yin-Yang Fish, claiming they were painted by Fuxi himself to stabilize the universe. I found this pattern utterly magical at the time, and it remains vivid in my memory to this day.

2. Perception of Core Cultural Symbols: After multiple visits, I find the Bagua (Eight Trigrams) and Dragon Totem best embody Fuxi's cultural legacy. The Bagua, as Fuxi's core creation, encapsulates our ancestors 'wisdom. As for the Dragon Totem, Fuxi is revered as the' Dragon Master '—we are all descendants of the dragon. The Taihao Mausoleum is adorned with dragon carvings everywhere, from architectural motifs to ceremonial banners, all exuding grandeur that instantly evokes the roots of Fuxi's culture.

3. Emotional and spiritual connection: There is undoubtedly resonance. As the progenitor of human civilization, Fuxi not only drew the Eight Trigrams but also established marriage systems and taught people farming techniques, which exemplifies a pioneering spirit of innovation.

4. Cultural and Creative Product Experience: I always pay attention to cultural and creative products during my visits. This time, I was particularly drawn to a bookmark featuring Bagua patterns and a notebook with dragon-themed embossing. The wooden bookmark showcases laser-engraved Bagua designs in understated hues, while the leather-bound notebook's cover features textured dragon motifs. What captivated me was its profound cultural significance, though the design was equally impressive—preserving traditional symbols without appearing outdated, making it perfect for everyday use.

5. Purchase and Sharing Motivation: I bought both items for personal use. The bookmark, placed inside the book, reminds me of the Taihao Mausoleum's cultural significance whenever I flip through its pages. The notebook, intended as a gift for my design colleague, features Fuxi-themed cultural products. Its dragon patterns and Bagua symbols—core elements of traditional Chinese culture—are both practical and culturally meaningful. I hope he finds design inspiration in these items.

6. My Vision for Cultural Creativity: If I were to design, I'd create a magnetic phone case themed around the Eight Trigrams. In today's world where smartphones are ubiquitous, phone cases have become a daily essential. I'd design the yin-yang fish motif as modular magnetic components that can be freely combined—like separating the yin and yang fish or pairing them with other Fuxi cultural elements. This approach would not only add playful charm but also promote the Eight Trigrams philosophy. The key features would be a sleek, minimalist design that resonates with young aesthetics, while ensuring durability and practicality.

7. Reflections on Cultural Heritage: I believe the integration of cultural innovation with tourism is the optimal approach. For cultural landmarks like Taihao Mausoleum, we should develop more youth-friendly cultural products—such as blind boxes, trendy collectibles, and limited-edition items—that young people are eager to purchase and carry. This creates an organic form of cultural dissemination. Additionally, schools could introduce more traditional culture courses, incorporating stories like those of Fuxi, the cultural progenitor, to help children understand our cultural roots from an early age, ensuring their preservation and continuation.

8. Summary of Overall Value: The most valuable takeaway from this journey was a profound spiritual awakening. As a cultural and creative designer, I had previously focused primarily on aesthetic appeal and commercial value in design. However, my visit to Taihao Mausoleum (a historic site) revealed to me that the essence of cultural and creative products lies in their cultural depth. The creative spirit and wisdom embodied in Fuxi culture (the legendary Chinese sage) taught me that exceptional cultural and creative products must harmonize cultural significance with practical utility, effectively conveying spiritual values. This insight will greatly guide my future design endeavors.

**Visitor 2:**

First Encounter and Impressions: I first heard of Taihao Mausoleum during my university days. My roommate, a native of Zhoukou, often shared stories about the temple fairs there and the legendary figure Fuxi.

2. Perception of Core Cultural Symbols: The love story between the dragon totem and Fuxi now stands as the most emblematic representation of Fuxi culture. The dragon totem radiates majestic power, and as descendants of the dragon, we take pride in every dragon motif we encounter. The tale of Fuxi and Nuwa—where he molded humans from clay and nurtured their lineage—combines romance with profound emotion. This narrative reveals Fuxi as not merely a great cultural progenitor, but a living, breathing human being.

3. Emotional and spiritual connection: A profound resonance. The love story of Fuxi and Nuwa deeply moved me. They sacrificed themselves for humanity's survival, and their selfless devotion has profoundly inspired me. As a marriage counselor, I help couples navigate relationship challenges daily. This story has made me realize that love isn't just about two people—it carries the weight of family and societal responsibilities. It also reinforces my belief that true love can overcome all obstacles.

4. Cultural and Creative Products Experience: I'm a big fan of the cultural and creative products at Taihao Mausoleum. This time, I bought a couple's bracelet themed around Fuxi and Nüwa, along with a notebook featuring Bagua patterns. The bracelet is exquisitely designed, adorned with carvings of Fuxi and Nüwa and the inscription "Holding your hand, growing old together," making it perfect for couples. The notebook, on the other hand, has a minimalist design with clear Bagua patterns, ideal for daily work notes.

5. Reasons for purchase and sharing: The couple's bracelet was a gift from my boyfriend and me, inspired by their touching love story. I hope we can hold hands and grow old together like them. The notebook is for my own use. When colleagues ask about it, I'll share stories about Taihao Mausoleum and Fuxi with them, suggesting they visit to experience the cultural atmosphere there.

6. The Ideal Cultural and Creative Product: If I were to design one, I would create a wedding and love commemorative album themed around Fuxi culture. The cover could feature portraits of Fuxi and Nuwa, while the inner pages would showcase cultural elements like their love story, Bagua patterns, and dragon totems. Blank pages could be included for couples to record their own love stories. The album should be romantic, exquisite, and hold significant commemorative value, making it perfect for couples to cherish as a keepsake of their romance or marriage.

7. Reflections on Cultural Heritage: I believe the marriage and dating market serves as an excellent platform to promote Fuxi culture. By incorporating the legendary love story of Fuxi and Nuwa into wedding-related products—such as couple jewelry, commemorative albums, and wedding decorations—this approach allows couples to celebrate their romance while gaining insights into Fuxi culture. It also helps cultivate a more balanced perspective on marriage and relationships.

8. Summary of Overall Value: As a relationship counselor, I have been exploring innovative approaches to help couples navigate emotional challenges. During my visit to Taihao Ling, I not only gained deeper insights into Fuxi's cultural legacy but also found inspiration in the legendary love story between Fuxi and Nuwa.

**Visitor 3:**

1. First Encounter and Impressions: I first heard of Taihao Mausoleum during a high school history class, where the teacher mentioned Fuxi as the cultural progenitor and referenced Taihao Mausoleum as his memorial temple. My first visit came this summer when I conducted a traditional culture research project with classmates. The most striking impression was the ancient architectural complex of Taihao Mausoleum, particularly the wooden pillars and plaques carved with dragon motifs, along with the massive Bagua stone tablet at the entrance. The solemnity of the site instantly conveyed the profound weight of ancient culture.

2. Perception of Core Cultural Symbols: After the visit, I found the Bagua (Eight Trigrams) and the legend of Fuxi and Nuwa to be the most representative of Fuxi culture. The Bagua patterns are highly recognizable, and the wisdom behind them—depicting the transformations of heaven and earth, and all things—is profoundly insightful. The legend of Fuxi and Nuwa molding humans from clay and procreation further reinforces my belief that Fuxi is not merely a historical figure but a spiritual bond connecting our ethnic origins. This humanistic spirit is deeply moving.

3. Emotional and Spiritual Connection: A Sense of Resonance. Fuxi's creation of the Eight Trigrams and the establishment of marriage customs were groundbreaking achievements from scratch. His marriage system, in particular, broke the primitive group marriage system, marking a monumental contribution to human civilization. As a college student, I am now learning new knowledge and sometimes find innovation challenging. Yet, the fact that Fuxi could make such remarkable creations under primitive conditions inspires me to embrace challenges and fear no mistakes.

4. Cultural and Creative Product Experience: I explored various cultural and creative products, including a Fuxi and Nuwa-themed postcard and a canvas bag with Bagua patterns. The postcard features a hand-drawn illustration that beautifully depicts Fuxi's creation of the Bagua and his teachings on farming. The canvas bag's minimalist design, with its low-saturation Bagua motifs, is ideal for daily carrying. What captivated me was its dual appeal—both aesthetic and meaningful. The postcard can be shared with friends to spread cultural awareness, while the bag's practicality showcases one's appreciation for traditional culture.

5. Purchasing and Sharing Motivation: The postcard is for friends across the country. I'll write about my visit, telling them this is the mausoleum of Fuxi, the cultural progenitor, and how the stories here trace our nation's origins. I hope they'll visit. The canvas bag is for personal use. Whenever classmates ask about it, I'll share Fuxi culture to help more people understand.

6. The Ideal Cultural and Creative Product: If I were to design it, I would create a Fuxi-themed journal set. The set would include a journal, stickers, and tape. The journal cover could feature symbols of Fuxi culture, such as the Eight Trigrams or dragon totems, while the inner pages could be printed with Fuxi's legendary stories and blank pages for notes. The stickers and tape could be designed with various cute Fuxi cultural elements, like Q-version Fuxi and Nuwa, Bagua patterns, or dragon motifs. The key features are cuteness and freshness, making it ideal for students. It would not only meet their note-taking needs but also help them learn about Fuxi culture through use.

7. Reflections on Cultural Heritage: I believe the integration of new media is a great approach. We can utilize platforms like TikTok and Xiaohongshu to create engaging short videos, such as animated stories about the legend of Fuxi or recommendations for cultural and creative products from Taihao Mausoleum. This can attract more young people's attention and make traditional culture more relatable.

8. Summary of Overall Value: Through field visits, I gained a deeper understanding of Fuxi culture, moving beyond the dry texts in textbooks. Moreover, Fuxi's creative spirit profoundly inspired me, deepening my love for China's excellent traditional culture and strengthening my resolve to inherit and promote it.

**Tourist 4:**

1. First Encounter and Impressions: I was born in Zhoukou, and I knew about Taihao Mausoleum from childhood. My first visit was when I was five or six years old, accompanying my parents to burn incense and pray for blessings. The most striking impression was the Ancestral Hall of Taihao Mausoleum, which housed a statue of Fuxi—tall and majestic. Outside the hall stood ancient cypresses, which elders said were over a thousand years old. At that time, I felt Fuxi was our revered ancestor, deeply sacred.

2. Perception of Core Cultural Symbols: In my view, the dragon totem and the ancient architecture of Taihao Mausoleum best embody Fuxi culture. As the "Master of the Dragon," Fuxi represents us as descendants of the dragon, with the dragon totem being our national symbol. The ancient structures of Taihao Mausoleum, having withstood millennia of weathering, remain remarkably well-preserved. Every hall and brick is a living testament to history.

3. Emotional and spiritual connection: Certainly. As the progenitor of human civilization, Fuxi taught people to weave nets for fishing, domesticate livestock, and cultivate the five grains, guiding humanity from primitive ignorance to civilization. This spirit of benefiting future generations commands my profound admiration. In my youth, I was a farmer who relied on farming for sustenance, for it was through farming that we could secure our food.

4. Cultural and Creative Product Experience: During my visits, I always explore these items. This time, I bought a jade pendant shaped like a bagua (a traditional Chinese divination tool) and a book about the legend of Fuxi. The pendant is exquisitely crafted, believed to bring good fortune when worn. The book is richly illustrated with detailed stories, making it a fascinating read. What truly captivated me was the deeper meaning behind them—the pendant's protective power and the book's insights into our ancestors' legacy.

5. Reasons for Purchase and Sharing: The jade pendant was bought for personal keepsake, hoping to bless my family with peace. The book is meant for my grandson. I'll tell him this is our ancestors' story—his forebears, the founding ancestors of the Chinese nation, made great contributions. I hope he studies diligently, learns about our traditional culture, and grows into a valuable member of society.

6. The Ideal Cultural and Creative Product: Aromatherapy Bag. As a traditional Chinese handicraft, the aromatherapy bag can be filled with mugwort to ward off evil spirits and prevent epidemics.

7. Reflections on Cultural Heritage: The Taihao Mausoleum hosts annual temple fairs and grand sacrificial ceremonies, enabling more people to honor Fuxi and explore his cultural legacy. Family plays a vital role—elders should share Fuxi's stories with children, helping them understand their roots from an early age, thus ensuring the continuity of Fuxi's cultural legacy across generations.

8. Summary of Overall Value: I am now 65 years old. Every time I visit Taihao Mausoleum, I feel the protection of our ancestors, which brings me a profound sense of peace. It is also gratifying to see an increasing number of visitors coming here for worship, as this is a blessing for our nation.

Visitor 5:

1. First Encounter and Impressions: Born and raised in Zhoukou, I first visited Taihao Mausoleum in my teens during a village temple fair. What struck me most was the vibrant atmosphere of the fair and the Bagua Pool within the mausoleum. The water was crystal clear, and a small bridge shaped like the Bagua (Eight Trigrams) stood above it, creating a magical experience. The elders told me that Fuxi, the legendary sage who drew the Bagua here to establish cosmic order, was our great benefactor.

2. Perception of core cultural symbols: I believe the Eight Trigrams best represent Fuxi culture. Created by Fuxi, the Eight Trigrams contain profound principles. Although ordinary people may not understand the deep academic meanings, they universally recognize the trigrams as auspicious symbols that can bring protection and peace.

3. Emotional and spiritual connection: Fuxi taught people to cultivate crops and weave clothes, freeing them from hunger and cold.

4. Cultural and creative product experience: I bought a small ceramic figurine with a Bagua pattern this time, which looks beautiful at home and can also protect the house.

5. Purchase and sharing motivation: Enjoy watching it.

6. The ideal cultural and creative garment: it should be durable, easy to clean, and feature vibrant, eye-catching patterns.

7. Reflections on Cultural Heritage: Oral Transmission. Elders should frequently narrate stories to children, enabling them to remember their ancestors from an early age. Our temple fairs and sacrificial rituals must also be perpetuated; otherwise, they would lose their vibrancy.

8. Summary of overall values: At this stage of life, I have no other aspirations beyond wishing my family peace and good health.

Visitor 6:

1. First Encounter and Impression: I first heard of Taihao Mausoleum online, about three years ago, when I read an article introducing China's traditional cultural scenic spots. My first visit was during a business trip passing through Zhoukou, where I took the opportunity to come and see it. The deepest impression at first was the vast scale of Taihao Mausoleum, the majestic ancient architectural complex, and the enormous Bagua diagram, which is rarely seen in other places and left me deeply impressed.

2. Perception of core cultural symbols: After visiting, I feel that the dragon totem and the Eight Trigrams best represent Fuxi culture. The dragon totem is a symbol of our Chinese nation, while Fuxi is the "dragon master," and the two are inseparably linked. The Eight Trigrams, as Fuxi's core creation, contain rich philosophical ideas and have had a significant impact not only in China but also worldwide.

3. Emotional and Spiritual Connection: Offers valuable inspiration. Fuxi's innovative spirit is truly commendable. Despite primitive conditions, he invented numerous innovations that transformed human life. This pioneering and daring spirit is particularly vital for modern professionals. To achieve greater success in our careers, continuous innovation remains essential.

4. Cultural and Creative Product Experience: I noticed several cultural and creative products, primarily souvenirs featuring Bagua (Eight Trigrams) and dragon motifs, such as keychains, bookmarks, and decorative figurines. What particularly caught my eye was a Bagua-shaped USB drive, which boasts a unique design that combines practicality with cultural significance. As I frequently use USB drives for work, this one not only meets my professional needs but also serves as a memorable keepsake from the trip.

5. Purchase and Sharing Motivation: I bought this Bagua USB drive primarily for personal use. When friends ask, I'll explain it's a cultural product from Taihao Mausoleum, featuring Bagua patterns created by Fuxi, the cultural progenitor.

6. The Ideal Cultural Innovation: If I were to design, I would create a smart bracelet themed around Fuxi culture. Given the current popularity of smart bracelets, I would incorporate elements of Fuxi culture such as Bagua and dragon totems. Additionally, the bracelet could feature functions related to Fuxi culture, such as daily reminders of Fuxi's famous quotes, health data tracking, and analysis of users' health status using Bagua theory. The key feature is to blend technological sophistication with cultural depth, making it suitable for young users.

7. Reflections on Cultural Heritage: I believe the integration of technology and culture is the optimal approach. By leveraging VR and AR, we can enable people to experience Fuxi culture more vividly. Through VR technology, visitors can travel back to ancient times and witness firsthand Fuxi creating the Eight Trigrams and teaching farming. Additionally, developing Fuxi-themed mobile apps and games would allow young people to explore this cultural legacy through entertainment.

8. Overall Value Summary: My previous understanding of Fuxi culture was rather superficial. This field visit, however, allowed me to truly appreciate the profound depth and richness of Fuxi culture.

Tourist 7:

1. First Encounter and Impressions: I first heard of Taihao Mausoleum in my twenties while reading a book about the ancient imperial tombs of China. My first visit was during this year's National Day holiday, accompanied by my child. The most profound impression was the rich cultural atmosphere of Taihao Mausoleum, where elements related to Fuxi culture could be seen everywhere, such as the Bagua diagram, dragon carvings, and statues of Fuxi. Particularly, the incense in the Ancestral Hall was especially vigorous, reflecting people's reverence for Fuxi.

2. Perception of core cultural symbols: The dragon totem is a symbol of the Chinese nation. As the "dragon master," Fuxi endowed the dragon totem with spiritual connotations for the nation.

3. Emotional and spiritual connection: He arranged the marriage to ensure our lineage continuation.

4. Cultural and creative product experience: I bought several items, including puzzle toys that are perfect for kids to play with, helping them learn about Chinese gossip while having fun.

5. Purchase and sharing motivation: The puzzle toy was bought for the child.

6. The perfect cultural and creative item: a keychain that's hard to lose.

7. Thoughts on Cultural Heritage: Parents should share more stories about Fuxi with their children and take them to visit cultural heritage sites.

8. Overall Value Summary: This journey has deepened my bond with my child. We've learned and grown together, which I consider the most precious thing.

Tourist 8:

1. First Encounter and Impressions: I first heard of Taihao Mausoleum and Fuxi culture in a university course on East Asian culture, where the teacher mentioned that Fuxi is the cultural ancestor of China and has had a significant impact on East Asian culture. My first visit was this year, as a cultural exchange scholar, I came to China for traditional culture research. The most profound impression was the ancient architectural complex of Taihao Mausoleum, which was magnificent and grand, along with the huge Bagua diagram, full of mysterious charm. I believe Fuxi culture is not only a cultural treasure of China but also an important part of East Asian culture.

2. Perception of core cultural symbols: After the visit, I felt that the Bagua and the dragon totem best represent Fuxi culture. The Bagua is Fuxi's core creation, and its concept of yin-yang balance not only holds an important position in Chinese philosophy but also has certain manifestations in traditional Korean culture, such as the Bagua elements on the Korean national flag. The dragon totem is a symbol of the Chinese nation and a common cultural symbol among many East Asian ethnic groups. As the "Dragon Master," Fuxi endowed the dragon totem with new connotations, making it a bond connecting the cultures of various East Asian ethnic groups.

3. Emotional and Spiritual Connection: A profound inspiration. Fuxi's pioneering spirit and inclusive mindset deeply moved me. Despite primitive conditions, he invented numerous innovations that transformed human life—a spirit of bold innovation worthy of emulation by all. Moreover, Fuxi culture demonstrates remarkable inclusiveness, not only assimilating cultural elements from diverse regions but also exerting far-reaching influence on neighboring cultures. This inclusive ethos holds significant relevance for contemporary global cultural exchange and integration.

4. Cultural and Creative Product Experience: I am very interested in the cultural and creative products here and have bought many of them, including Bagua-shaped ornaments, dragon-patterned handicrafts, and books themed on Fuxi culture. What attracted me was a Bagua-patterned ceramic tea set, which is exquisitely designed, blending the charm of China's traditional culture with practicality. I believe drinking tea with this set can evoke a sense of tranquility and harmony, while also allowing one to appreciate the profound depth of Fuxi culture.

5. Purchase and Sharing Motivation: Some of these cultural and creative products are bought for myself as a memento of this cultural research, while others are intended as gifts for my family and friends. I will tell them that these are cultural and creative products from China's Taihao Mausoleum, featuring Bagua and dragon totems as important symbols of Fuxi culture. Fuxi is the cultural progenitor of China, and his culture has had a profound impact on East Asian culture. I hope these cultural and creative products will help them gain a deeper understanding of China's traditional culture.

6. Visionary Cultural Innovation: I envision creating a cultural product that blends Fuxi culture with Korean traditions, such as a pendant incorporating Bagua (Eight Trigrams) and Taiji (Yin-Yang) symbols. The Taiji represents a cornerstone of Korean heritage, while Bagua embodies the essence of Fuxi philosophy. This fusion not only showcases the profound wisdom of Fuxi culture but also highlights the cultural exchange between China and Korea. The design should be compact and elegant for portability, while also possessing collectible value.

7. Reflections on Cultural Heritage: I believe cultural exchange and international collaboration are excellent approaches. By organizing international cultural seminars and exhibitions, we can introduce Fuxi culture to more countries and regions. Furthermore, strengthening cultural cooperation between East Asian nations like China and South Korea will enable joint research and preservation of Fuxi culture. This would establish Fuxi culture as a cultural bridge connecting East Asian ethnic groups, thereby promoting the prosperity and development of East Asian culture.

8. Summary of Overall Value: As a researcher of East Asian culture, I have always been committed to exploring the common roots of the cultures of various ethnic groups in East Asia. This visit to Taihao Mausoleum has deeply impressed upon me that Fuxi culture is not only a cultural treasure of China, but also a shared cultural wealth of all ethnic groups in East Asia. It has made me realize more clearly that there are profound cultural ties among the ethnic groups in East Asia, and we should strengthen cultural exchanges to jointly inherit and promote the excellent traditional culture.

Tourist 9:

First Encounter and Impressions: My home is in Huaiyang, and I grew up near the Taihao Mausoleum. My first visit to the Taihao Mausoleum was probably when I was just learning to walk, accompanying my parents. The most profound initial impression was the temple fair at the Taihao Mausoleum. During the annual temple fair, the area is crowded with people, offering a variety of snacks, toys, and lively performances.

2. Perception of Core Cultural Symbols: As a native of Huaiyang, I believe the Bagua (Eight Trigrams) and the ancient cypresses at Taihao Mausoleum best embody Fuxi culture. The Bagua, created by Fuxi himself, stands as a source of pride for Huaiyang, attracting countless visitors annually. The cypresses at Taihao Mausoleum, according to elders, are thousands of years old. They have witnessed the mausoleum's transformations and the enduring legacy of Fuxi culture. These ancient trees serve as guardian deities, protecting our ancestors and, by extension, the people of Huaiyang.

3. Emotional and Spiritual Connection: There is undoubtedly a resonance. Fuxi, our cultural progenitor, made significant contributions by teaching us farming, weaving, and marriage, enabling us to live a happy life. Whenever I see the increasing number of visitors at Taihao Mausoleum, I feel particularly delighted, as it signifies that Fuxi culture is being recognized and cherished by more and more people.

4. Cultural and Creative Product Experience: As a regular visitor to Taihao Mausoleum, I'm well-acquainted with its cultural and creative products. This time, what caught my eye was a Fuxi-themed skateboard featuring Bagua patterns and dragon motifs. Its stylish design appealed to young people like us. Another standout was a Bagua-shaped headphone with excellent sound quality and a uniquely attractive design.

5. Purchase and Sharing Motivation: I bought this skateboard primarily for personal use. I often take it to parks and squares to play.

6. The Ideal Cultural Innovation: If I were to design, I would create an esports mouse themed around Fuxi culture. With esports being a popular pastime among young people today, mice have become essential gear. The design would incorporate Fuxi cultural elements like Bagua (Eight Trigrams) and dragon totems, while also featuring special functions such as customizable buttons and lighting effects, ensuring both aesthetics and functionality. The key features would be a high-tech feel, suitability for esports players, and the ability to promote Fuxi culture.

7. Reflections on Cultural Inheritance: I believe communication among young people is a crucial approach. We can utilize new media platforms such as TikTok, Kuaishou, and Xiaohongshu to create engaging short videos, for example, showcasing cultural and creative products themed around Fuxi culture or sharing the beauty and stories of Taihao Mausoleum, to help more young people understand Fuxi culture. Additionally, we can organize Fuxi culture-themed activities, such as skateboarding competitions and e-sports tournaments, to attract more young people to participate, ensuring the inheritance and promotion of Fuxi culture among the younger generation.

8. Summary of Overall Value: This visit to Taihao Mausoleum has given me the most valuable takeaway—a profound sense of responsibility. As a young man from Huaiyang, my previous understanding of Fuxi culture was superficial. Through in-depth interviews and research, I have gained a deeper appreciation for its significance. I feel it is my duty to preserve and promote Fuxi culture, helping more people understand our cultural ancestor and Huaiyang's heritage.

Visitor 10:

1. First Encounter and Impressions: I first heard of Taihao Mausoleum over thirty years ago from my parents, who described it as the sacred temple of Fuxi. This year, I visited it with my family. The most striking feature was the Ancestral Hall, where the towering statue of Fuxi with his benevolent gaze evoked profound reverence. Outside, the incense smoke was thick, and the pervasive scent of sandalwood created a serene atmosphere.

2. Perception of core cultural symbols: After visiting, I feel that the Eight Trigrams best represent Fuxi culture. The Eight Trigrams are Fuxi's core invention, embodying the laws of change in all things in the universe, and are the essence of China's traditional culture.

3. Emotional and Spiritual Connection: A profound resonance. As the cultural progenitor, Fuxi's selfless dedication and innovative spirit deeply moved me. His teachings on farming, which solved people's basic needs, stand as a monumental contribution to humanity. Now a teacher, I see Fuxi's story as a reminder that education should cultivate students' creativity and spirit of service, empowering them to contribute meaningfully to society.

4. Cultural and Creative Product Experience: I noticed several cultural and creative products. This time, I bought a comic book about the legend of Fuxi and a Bagua-shaped pen holder. The comic book features exquisite illustrations and a vivid story, making it ideal for students. The pen holder is minimalist in design, with a clear Bagua pattern, serving both practical and decorative purposes for the desk in the office. What attracted me most is how these items allow me to better understand Fuxi culture while also serving as teaching tools to help my students learn about it.

5. Purchase and Sharing Motivation: The comic book is for my students. In class, I will share the story of Fuxi with them, helping them grasp Fuxi culture through visual storytelling. I hope they will be inspired by Fuxi's legacy to study diligently and grow into creative, dedicated individuals. The pen holder is for myself. When colleagues ask, I'll introduce them to Taihao Mausoleum and Fuxi culture, suggesting they explore these sites as well.

6. The Ideal Cultural and Creative Project: I envision creating a bookmark set themed around Fuxi culture. The bookmarks could feature diverse designs—such as Bagua trigrams, dragon totems, or statues of Fuxi—each adorned with his famous sayings. The set should be compact and elegant, tailored for students, while subtly immersing them in Fuxi culture during reading, inspiring them to study diligently.

7. Reflections on Cultural Heritage: I believe education is the most effective way to preserve Fuxi culture. Schools should integrate Fuxi culture into their curriculum through classroom instruction and extracurricular activities, enabling students to systematically explore this cultural legacy. Teachers should leverage diverse teaching resources—such as cultural and creative products, comic books, and documentaries—to help students intuitively appreciate the charm of Fuxi culture. Parents should also collaborate with schools by sharing stories about Fuxi with their children, helping them understand China's excellent traditional culture from an early age.

8. Summary of Overall Value: As an educator, I have been actively seeking more effective teaching methods to inspire students 'interest in traditional culture. During my visit to Taihao Mausoleum, I not only gained deeper insights into Fuxi culture but also discovered valuable teaching resources, such as cultural and creative products and illustrated storybooks. These materials can make my lessons more engaging and help students better understand and preserve China's outstanding traditional culture.

Visitor 11:

1. First Encounter and Impressions: As a native of Huaiyang, I first visited Taihao Mausoleum during my first grade of elementary school when the school organized a spring outing. The most vivid memory was the lively street vendors inside the mausoleum—some selling snacks, others toys and souvenirs, creating a bustling atmosphere. The round Bagua altar, adorned with black-and-white patterns, particularly captivated me. My teacher once remarked that these were the Bagua symbols drawn by Fuxi, adding an air of mystique. From that moment, Taihao Mausoleum became a place I found utterly fascinating.

2. Perception of Core Cultural Symbols: I now consider the dragon totem and the Eight Trigrams as the most emblematic representations of Fuxi culture. The dragon totem exudes an awe-inspiring presence, as we are all descendants of the dragon. Every time we encounter dragon carvings, we feel a profound sense of pride. The Eight Trigrams hold a unique charm—though their exact meaning remains elusive, they seem to embody profound wisdom. Additionally, legends about Fuxi, such as his creation of humans from clay and his design of the Eight Trigrams, are both fascinating and deeply inspiring.

3. Emotional and Spiritual Connection: Some Inspirational Insights. Fuxi, the legendary ancestor, could conceive so many ideas and create so many miracles in ancient times—truly remarkable. Now in high school, I face immense academic pressure and sometimes feel overwhelmed. Yet, when I think of Fuxi's creative spirit, these challenges seem insignificant. His legacy motivates me to study diligently and strive to become a capable individual who can contribute to society.

4. Cultural and Creative Products Experience: I'm a big fan of the cultural and creative products from Taihao Mausoleum. This time, I bought a Bagua-shaped badge and a Fuxi-themed phone case. The badge's design is exquisitely crafted, making it a perfect accessory for a schoolbag. The phone case's pattern is trendy, featuring a Q-version (a popular Chinese cartoon style) of Fuxi drawing the Bagua, which resonates deeply with young people like us. What drew me in was their aesthetic appeal—aligning with our tastes while proudly representing Huaiyang's cultural heritage, which fills me with pride.

5. Purchase and Sharing Motivation: I bought these badges and phone cases for personal use, and I wear them daily. When classmates ask, I explain they are cultural and creative products from Huaiyang's Taihao Mausoleum. As Fuxi is revered as our cultural progenitor, and Taihao Mausoleum holds sacred significance, I hope they'll visit Huaiyang and explore this historic site when they have time.

6. The Ideal Cultural Innovation: If I were to design, I would create a Fuxi-themed blind box. The box would contain Q-version figurines of Fuxi and Nuwa, along with small figurines shaped like the Eight Trigrams and dragon totems. Each box would also include a card featuring Fuxi's legendary stories. The key features are to make it cute and engaging, capturing the attention of young people while allowing them to learn about Fuxi culture through collecting these blind boxes.

7. Reflections on Cultural Heritage: I believe Fuxi culture can be effectively passed down through anime and video games. As younger generations today are deeply engrossed in these media formats, integrating Fuxi culture into them—such as creating an anime series or developing a game centered around Fuxi—would help more young people discover this ancient wisdom. Additionally, schools could organize more Fuxi culture-themed activities, like speech contests and handmade poster competitions, to deepen our understanding of this cultural legacy.

8. Summary of Overall Value: The most precious takeaway from this visit to Taihao Mausoleum is a profound sense of pride. As a native of Huaiyang, I previously knew little about Taihao Mausoleum and Fuxi culture. Through interviews, I gained a deeper appreciation for the historical significance of Taihao Mausoleum and the profound depth of Fuxi culture. I am proud to be a Huaiyang native and honored to have such a great cultural ancestor. I hope more people will visit Huaiyang and Taihao Mausoleum in the future to learn about our Fuxi culture.

Visitor 12:

1. First Encounter and Impressions: I first heard of Taihao Mausoleum in a history class at university, where the teacher mentioned the legendary era of ancient China and referred to Fuxi and Taihao Mausoleum. My first visit was during a trip to Henan with friends, where I took the opportunity to see it. The most profound impression was the distinctive ancient architecture of Taihao Mausoleum, with upturned eaves, carved beams, and painted rafters, exuding the charm of traditional Chinese architecture. There was also the massive Bagua diagram, which evoked a sense of mysterious power.

2. Perception of core cultural symbols: After visiting, I feel that the humanistic spirit of Bagua and Fuxi best represents Fuxi culture. Bagua is Fuxi's core creation, and its theory of Yin and Yang not only forms the foundation of Chinese philosophy but also exerts a profound influence on Chinese medicine, martial arts, art, and other fields. Fuxi's humanistic spirit, such as his contributions to human civilization and his role in establishing families and society, is an important source of the Chinese national spirit. This humanistic spirit endows Fuxi culture with strong vitality and influence.

3. Emotional and Spiritual Connection: A Deep Resonance. Fuxi's creative and selfless spirit has profoundly inspired me. As a media professional, I constantly engage with diverse information while pursuing continuous learning and innovation. Fuxi's story teaches me that only through relentless innovation can we create exceptional works, and only through selfless dedication can we earn societal recognition. His legacy motivates me to work with greater diligence and dedication.

4. Cultural and Creative Product Experience: I noticed several cultural and creative products and purchased a Bagua-shaped figurine along with an illustrated book on Fuxi culture. The figurine, crafted from exquisite jade, serves both as a decorative piece and a symbol of good fortune. The book features beautiful illustrations and detailed descriptions, offering a deeper understanding of Fuxi culture. What particularly attracted me was how these items allowed me to better appreciate the charm of Fuxi culture while also serving as souvenirs for my trip.

5. Purchasing and Sharing Motivation: The decorative figurine was bought for personal keepsake, while the art album was intended as a gift for my colleague. I explained that this is a cultural product from Taihao Mausoleum, featuring the story and cultural legacy of Fuxi, the cultural progenitor. I hope he can use this album to deepen his understanding of China's outstanding traditional culture, thereby enriching our media work with cultural depth.

6. The Ideal Cultural Innovation: If I were to design one, I would create a USB drive featuring a documentary on Fuxi culture. The drive could contain a documentary that vividly narrates Fuxi's legendary stories and cultural significance through on-location filming and animation. Its design could be inspired by the Bagua (Eight Trigrams) or dragon totem, combining aesthetic appeal with practicality. The key features would be its high cultural and collectible value, making it perfect for enthusiasts of traditional culture to collect and enjoy.

7. Reflections on Cultural Heritage: I believe the power of media is immense. Through various media platforms such as television, newspapers, and the internet, we can promote Fuxi culture to make more people aware of it. We can produce high-quality documentaries, animations, and TV series to vividly showcase the charm of Fuxi culture. Additionally, we can utilize new media platforms like WeChat, Weibo, and TikTok to organize interactive activities, attracting more people to participate in the inheritance and promotion of Fuxi culture.

8. Summary of Overall Value: The most valuable takeaway from this Taihao Mausoleum journey was the profound cultural immersion. As a media professional, I am exposed to diverse cultural elements, yet Fuxi culture left the deepest impression on me. It is not merely a traditional heritage but a crystallization of wisdom and a spiritual force. This journey has deepened my appreciation for China's outstanding traditional culture and reinforced my sense of responsibility and mission—to help more people understand and preserve this cultural legacy through my work.

**Visitor 13:**

1. First Encounter and Impressions: I first heard of Taihao Mausoleum and Fuxi Culture twenty years ago when I came to China for my studies, and my Chinese teacher told me about it. This year marks my first visit as a cultural researcher conducting fieldwork in China. The most profound impression was the vast scale of Taihao Mausoleum and its profound cultural heritage, with elements related to Fuxi Culture visible everywhere. Especially the statue of Fuxi in the Ancestral Hall, which evokes a sense of solemnity and sanctity. I believe Fuxi Culture is an important part of China's traditional culture and has also had a certain influence on Japanese culture.

2. Perception of core cultural symbols: After the visit, I felt that the Bagua and the dragon totem best represent Fuxi culture. The Bagua is Fuxi's core creation, and its concept of yin-yang balance not only holds an important position in Chinese philosophy but also has certain manifestations in traditional Japanese culture, such as the influence of Bagua thought on the Japanese yin-yang philosophy. The dragon totem is a symbol of the Chinese nation and an important symbol in Japanese culture, with the image of the dragon appearing in many Japanese myths, legends, and artistic works. As the "Dragon Master," Fuxi endowed the dragon totem with new connotations, making it a bond connecting Chinese and Japanese cultures.

3. Emotional and Spiritual Connection: A profound inspiration. Fuxi's pioneering spirit and inclusive mindset deeply moved me. Despite primitive conditions, he invented numerous innovations that transformed human life—a spirit of bold innovation worthy of emulation by all. Moreover, Fuxi culture demonstrates remarkable inclusiveness, not only assimilating cultural elements from diverse regions but also exerting far-reaching influence on neighboring cultures. This inclusive ethos holds significant relevance for contemporary global cultural exchange and integration.

4. Cultural and Creative Product Experience: I am very interested in the cultural and creative products here and have bought many of them, including ceramic items in the shape of the Bagua, wooden products carved with dragon patterns, and books themed on Fuxi culture. What attracted me was a screen with a Bagua pattern, which is exquisitely designed, blending the charm of China's traditional culture with practicality. I believe placing it at home can create a sense of tranquility and harmony, while also allowing one to appreciate the profound depth of Fuxi culture.

5. Purchase and Sharing Motivation: These cultural and creative products are partly bought for personal use as mementos of this cultural exploration, and partly intended as gifts for my family and friends.

6. The Ideal Cultural Innovation: If I were to design, I would create a cultural product that blends Fuxi culture with Japanese culture, such as a handkerchief featuring Bagua and cherry blossoms. Cherry blossoms are Japan's national flower, while Bagua represents the core philosophy of Fuxi culture. This combination not only showcases the profound depth of Fuxi culture but also reflects the cultural exchange and integration between China and Japan. The design should be compact and elegant, ideal for carrying around, while also possessing collectible value.

7. Reflections on Cultural Heritage: I believe that cultural exchanges between China and Japan are an important way to inherit Fuxi culture. By organizing Sino-Japanese cultural seminars, exhibitions, and other activities, more Japanese and Chinese people can learn about Fuxi culture. At the same time, we can strengthen cultural cooperation between the two countries, jointly research and inherit Fuxi culture, making it a cultural bridge connecting the people of China and Japan, and promoting friendly exchanges and cultural prosperity between the two countries.

8. Overall Value Summary: The most precious gain from this trip to Taihao Mausoleum was a cultural resonance. As a cultural researcher, I have always been committed to exploring the common roots of Chinese and Japanese cultures. This visit to Taihao Mausoleum made me deeply realize that Fuxi culture is not only a cultural treasure of China, but also a shared cultural wealth of the people of both countries. It made me more aware of the profound cultural ties between China and Japan, and we should strengthen cultural exchanges, jointly inherit and promote excellent traditional culture, and promote the friendly development of both countries.

**Visitor 14:**

1. First Encounter and Impressions: My hometown is Tianshui, Gansu Province, the birthplace of Fuxi. From childhood, I heard stories about Fuxi from the elders. I first learned of Taihao Mausoleum in my twenties, when village elders told me it was Fuxi's sacred temple. This year, I visited for the first time with my family. The most striking impression was the Ancestral Hall of Taihao Mausoleum, where the towering statue of Fuxi bore a striking resemblance to the one in our local Fuxi Temple, evoking a sense of familiarity. Outside the hall, the incense smoke was particularly thick, reflecting the deep reverence people hold for Fuxi.

2. Perception of core cultural symbols: As a native of Tianshui, I believe the legends of the Eight Trigrams and Fuxi's birth best represent Fuxi culture. The Eight Trigrams are Fuxi's core creation and the origin of China philosophy. In Tianshui, there are many attractions related to the Eight Trigrams, such as Guatai Mountain, where it is said that Fuxi drew the Eight Trigrams. There is also the legend of Fuxi's birth, which tells that Fuxi was conceived by his mother Huaxu after she stepped on a giant's footprint in Leize. This legend is full of mystery and also reflects people's reverence and worship for Fuxi.

3. Emotional and Spiritual Connection: A profound resonance. As the cultural progenitor of humanity, Fuxi made monumental contributions by teaching us farming, weaving, and marriage, enabling us to live fulfilling lives. Being a native of Tianshui, I feel a profound responsibility to preserve and promote Fuxi culture. It brings me immense joy to see the growing number of visitors to Taihao Mausoleum and Tianshui Fuxi Temple, as it signifies that Fuxi culture is gaining wider recognition and appreciation.

4. Cultural and Creative Product Experience: I noticed several cultural and creative products and ended up buying a Bagua-shaped jade pendant and a book about the legend of Fuxi. The pendant, crafted from Hetian jade, is exquisitely made and believed to bring good fortune when worn. The book is richly illustrated with detailed stories, making it a fascinating read. What truly captivated me was the deeper meaning behind them—the pendant's ability to bring peace and the book's insights into our ancestors' stories.

5. Reasons for Purchase and Sharing: The jade pendant was bought for personal keepsake, hoping to bless my family with peace. The book is for my grandson, and I want to tell him this is the story of Fuxi, our Chinese ancestor who made great contributions to our nation. His birthplace is in Tianshui, and I hope he will study diligently, learn about our traditional culture, and grow up to be a valuable member of society.

6. The Ideal Cultural and Creative Product: If I were to design one, I would create a calendar themed around Fuxi culture. The calendar could feature cultural elements such as Fuxi's legendary stories, Bagua patterns, and dragon totems, along with dates of festivals and anniversaries related to Fuxi culture, such as his birthday. The key features would be practicality, aesthetic appeal, and suitability for all age groups, while also allowing people to learn about Fuxi culture through its use.

7. Reflections on Cultural Heritage: I believe collaborative inheritance is a crucial approach. Both Tianshui and Zhoukou are significant birthplaces of Fuxi culture. We can enhance cooperation between the two regions to jointly organize the Fuxi Cultural Tourism Festival and grand sacrificial ceremonies.

8. Summary of Overall Value: The most valuable takeaway from this visit to Taihao Mausoleum was a profound sense of cultural identity. As a native of Tianshui, I have always taken pride in Fuxi culture. This visit to Taihao Mausoleum made me realize that Fuxi culture is not only a cultural treasure of Tianshui and Zhoukou, but also a shared heritage of the Chinese nation. It deepened my understanding that we are all descendants of the dragon, sharing a common cultural roots. We should unite to preserve and promote the excellent traditional culture of China.

**Visitor 15:**

1. First Encounter and Impressions: I first heard of Taihao Mausoleum four years ago when I watched a documentary about China's traditional culture with my friends, which mentioned Taihao Mausoleum and Fuxi culture. This was my first visit, specifically traveling to Henan to see Taihao Mausoleum. The most profound impression was the ancient architectural complex of Taihao Mausoleum, which was incredibly magnificent, along with the huge Bagua diagram, full of mysterious charm. I think Taihao Mausoleum is a place with rich cultural heritage, well worth a visit.

2. Perception of Core Cultural Symbols: After the visit, I believe the dragon totem and Fuxi's creative spirit best represent Fuxi culture. The dragon totem is a symbol of the Chinese nation, and every time I see dragon carvings, I feel a sense of pride.

3. Emotional and spiritual connection: A profound resonance. It's truly remarkable how Fuxi, in such primitive conditions, could achieve so many innovations. As a designer myself, I constantly need to innovate in my work, and sometimes I hit a creative block, feeling stuck. But whenever I think of Fuxi's pioneering spirit, I realize my challenges are nothing compared to his. With persistence, I'm sure I'll find solutions.

4. Cultural and Creative Products Experience: I'm particularly fond of the cultural and creative products from Taihao Mausoleum. This time, I purchased a Bagua-shaped notebook and a canvas bag with dragon motifs. The notebook's minimalist design features a clear Bagua pattern, perfect for daily design notes. The canvas bag's trendy design and vibrant colors make it ideal for everyday use. What drew me in was their practicality and cultural depth, allowing me to experience the charm of Fuxi culture in both work and life.

5. Motivation for purchase and sharing: I bought both a notebook and a canvas bag for personal use, and I use them daily.

6. The Ideal Cultural Creation: If I were to design, I would create an illustration collection themed around Fuxi culture. The illustrations could adopt a modern painting style to vividly depict Fuxi's legendary stories and the essence of Fuxi culture. Each illustration could be accompanied by a brief textual description to enhance readers' understanding. The collection should be aesthetically pleasing and refined, possessing high artistic and collectible value, making it ideal for enthusiasts of illustrations and traditional culture.

7. Reflections on Cultural Heritage: I believe design serves as an excellent medium for preserving Fuxi culture. By integrating its elements into contemporary products and art forms—such as cultural and creative merchandise, illustrations, animations, and games—we can make this ancient wisdom more relatable to modern life, inspiring younger generations to embrace and appreciate it. Furthermore, hosting design competitions centered on Fuxi culture could encourage more designers to actively participate in its preservation and promotion.

8. Summary of Overall Value: The most valuable takeaway from this visit to Taihao Mausoleum was a surge of design inspiration. As a designer, I constantly seek fresh creative ideas. This journey not only deepened my understanding of Fuxi culture but also revealed numerous design inspirations within its elements. These insights will enrich my designs with cultural depth and help better promote China's outstanding traditional culture.

**Visitor 16:**

1. First Encounter and Impressions: I first heard of Taihao Mausoleum in a university folklore course, where the teacher mentioned China's folk beliefs and referred to Taihao Mausoleum and Fuxi culture. This was my first visit, and I came to Henan with classmates for a folklore research trip. The most profound impression was the temple fair culture of Taihao Mausoleum. Although we didn't attend the fair when we arrived, we could still feel the strong folk atmosphere. There was also the Bagua Altar, with its clear Bagua diagrams, which gave people a sense of mysterious power.

2. Perception of core cultural symbols: After visiting, I feel that the Bagua and the sacrificial culture of Taihao Mausoleum best represent the Fuxi culture. The Bagua is Fuxi's core creation, the essence of China's traditional culture, and an important part of the sacrificial culture of Taihao Mausoleum. The sacrificial culture of Taihao Mausoleum has a long history, with grand sacrificial ceremonies held every year. People from all over the country come here to worship Fuxi. This sacrificial culture is not only a tribute and veneration to Fuxi but also a continuation and promotion of China's excellent traditional culture.

3. Emotional and Spiritual Connection: A profound inspiration. Fuxi's pioneering spirit and selfless dedication deeply moved me. His tireless efforts for human civilization's progress are truly commendable. As a folklore studies student aspiring to research and preserve folk culture, Fuxi's story has strengthened my resolve and conviction.

4. Cultural and Creative Product Experience: I noticed several cultural and creative products and purchased a Bagua-shaped keychain and a book on the sacrificial culture of Taihao Mausoleum. The keychain is exquisitely designed and looks great on a key, while the book offers rich content, detailing the history and current state of the sacrificial culture at Taihao Mausoleum, deepening my understanding of its folk traditions. What attracted me most was how these items helped me better understand Fuxi culture and the folk traditions of Taihao Mausoleum, while also serving as a keepsake for my research.

5. Motivation for Purchase and Sharing: The keychain was bought as a keepsake, while the book was intended as a gift to my mentor. It introduces the sacrificial culture of Taihao Mausoleum, which I hope will provide valuable references for his research. Additionally, I will elaborate on the Fuxi culture and folk traditions of Taihao Mausoleum in my research report to help more people understand this historical site.

6. The Ideal Cultural Creation: I envision creating a folk-themed planner centered on Fuxi culture. This planner would document the temple fairs, sacrificial rituals, and folk legends of Taihao Mausoleum, while also featuring custom stickers and seals inspired by these traditions. Designed to be both culturally significant and practical, it would serve as an essential resource for folklore enthusiasts and researchers, while also helping the public better understand the rich folk culture of Taihao Mausoleum.

7. Reflections on Cultural Heritage: Folklore research and documentation serve as vital means to preserve Fuxi culture. Through in-depth investigations, we can examine the current state of Fuxi culture and folk traditions at Taihao Mausoleum, documenting invaluable legends, customs, and skills. Furthermore, these findings can be compiled into books, academic papers, and documentaries, enabling broader public engagement with Taihao Mausoleum's cultural legacy.

8. Summary of Overall Value: The most valuable outcome of my visit to Taihao Mausoleum was the research findings. As a folklore studies student, conducting fieldwork at Taihao Mausoleum deepened my understanding of Fuxi culture and its local traditions. I gathered a wealth of valuable materials that will not only strengthen my graduation thesis but also contribute to the study and preservation of Taihao Mausoleum's folk culture.

**Visitor 17:**

1. First Encounter and Impressions: I first heard of Taihao Mausoleum in my teens from my parents, who described it as the shrine of Fuxi. My first visit came in my twenties when I traveled there with my husband. The most striking feature was the Ancestral Hall, where the statue of Fuxi stood majestically with a serene gaze. Outside the hall, ancient cypresses were said to be over a thousand years old, as recounted by the elders.

2. Perception of Core Cultural Symbols: In my view, the Bagua and the statue of Fuxi best represent Fuxi culture. The Bagua was drawn by Fuxi, containing inexhaustible principles. Although ordinary people may not understand profound scholarship, they all recognize the Bagua as a benevolent symbol that brings protection and peace.

3. Emotional and spiritual connection: profound resonance. Fuxi, the cultural progenitor of humanity, brings me immense peace of mind whenever I visit Taihao Mausoleum to pay homage to him, especially as I grow older.

4. Cultural and creative product experience: Though I'm older and not very familiar with such items, I ended up buying a small figurine shaped like a gossip this time.

5. Purchase and Sharing Motivation: The small figurine is meant as a gift for my great-grandchild. I'll tell him the Bagua diagram on it was drawn by Fuxi, the legendary ancestor, to bless his healthy growth. I hope he'll grow up to be a successful person and never forget our ancestors.

6. The Ideal Cultural Innovation: If I were to design one, I would create a peace charm themed around Fuxi culture. This charm could hold fragrant herbs like mugwort and sandalwood, believed to ward off evil spirits and prevent epidemics. I would embroider it with Bagua patterns, dragon totems, or portraits of Fuxi, combining practical utility with cultural promotion. Key features include exquisite craftsmanship, long-lasting fragrance, and suitability for all ages—especially children—to safeguard their health and well-being.

7. Reflections on Cultural Heritage: I believe sacrificial rituals and family traditions are the most effective ways to preserve our heritage. Every year, the grand ceremony at Taihao Mausoleum is held with great fanfare, inviting more people to honor Fuxi and learn about his cultural legacy. Families also play a vital role—elders should share stories of Fuxi with their children, helping them understand their roots from an early age. This is how Fuxi culture can be passed down through generations. I often tell my great-grandson stories about Fuxi, hoping he will remember our ancestors.

8. Summary of Overall Value: The most precious takeaway from this visit to Taihao Mausoleum is a profound sense of inner peace. Now that I am older and in poorer health, every time I come to Taihao Mausoleum to pay homage to Fuxi, I feel an extraordinary tranquility, as if all my ailments have diminished. Fuxi culture is like a benevolent elder, safeguarding both our Chinese nation and each of us. I hope this cultural legacy will endure forever, blessing our descendants with peace and happiness.

**Visitor 18:**

1. First Encounter and Impression: I first heard of Taihao Mausoleum five years ago when I watched a documentary about the ancient imperial tombs of China with my friends, which mentioned Taihao Mausoleum. This is my first visit, as I came to Henan on a business trip and took the opportunity to come and see it.

2. Perception of core cultural symbols: After visiting, I feel that the dragon totem and the Eight Trigrams best represent Fuxi culture. The dragon totem is a symbol of the Chinese nation, while Fuxi is the "Dragon Master," and the two are inseparably linked; the Eight Trigrams are Fuxi's core creation, rich in philosophical ideas, and have had a profound impact on the culture and society of China.

3. Emotional and Spiritual Connection: A Thought-Provoking Perspective. Fuxi's pioneering spirit is profoundly inspiring. Despite his primitive circumstances, he invented numerous innovations that transformed human life. This innovative and daring spirit is particularly valuable for today's entrepreneurs. To thrive in the market, continuous innovation remains essential throughout the entrepreneurial journey.

4. Cultural and Creative Product Experience: I noticed several cultural and creative products, primarily souvenirs featuring Bagua (Chinese Eight Trigrams) and dragon motifs, such as keychains, bookmarks, and decorative figurines. What particularly caught my eye was a Bagua-shaped car air freshener, which combines practicality with cultural significance through its unique design. As a frequent driver, this product serves dual purposes: purifying the cabin air and preserving a memento of the journey.

5. Purchase and Sharing Motivation: I bought this gossip-themed car fragrance primarily for personal use. It serves as a meaningful keepsake and is believed to bring good luck during travels.

6. The Ideal Cultural and Creative Gift: A business gift set themed around Fuxi culture. The set includes a fountain pen with Bagua patterns, a dragon-patterned business card holder, and a leather notebook. Designed to be minimalist yet elegant, it aligns with the aesthetic preferences of professionals. Key features include practicality and sophistication, meeting both business needs and promoting Fuxi culture, making it an ideal corporate gift for clients.

7. Reflections on Cultural Heritage: I believe the integration of commerce and culture is an excellent approach. Elements of Fuxi culture can be incorporated into everyday products.

8. Summary of overall value: I believe that in future work, we should learn from Fuxi's innovative spirit, dare to experiment, and constantly break through to achieve greater success.

**Visitor 19:**

1. First Encounter and Impressions: I'm from Zhoukou, and my first visit to Taihao Mausoleum was with classmates. What struck me most was the Bagua Pool (Eight Trigrams Pool) inside the mausoleum—its crystal-clear waters and the sight of children feeding fish nearby. It felt truly magical, realizing that the stories of our ancestors actually unfolded right here in our neighborhood.

2. Perception of Core Cultural Symbols: I now consider the Eight Trigrams and the title of "Cultural Ancestor" to best embody Fuxi's legacy. The Eight Trigrams transcend mere patterns—they encapsulate the principles governing all creation. As Zhoukou natives, we take pride in Fuxi's creation of these trigrams. The title "Cultural Ancestor" stands as the ultimate tribute to his role in guiding humanity from primitive ignorance to civilization. This identity is deeply ingrained in our national psyche, and wherever we go, we feel this cultural connection.

3. Emotional and Spiritual Connection: Naturally, there's resonance! As a current teacher-training student aspiring to become an educator, I find inspiration in Fuxi's legacy. The ancient sage taught farming and marriage customs, essentially being humanity's earliest' educators 'who pioneered civilization through wisdom. This realization makes me understand that teaching isn't merely knowledge transmission—it's cultural inheritance. Like Fuxi, I feel a profound sense of mission to influence more people through my own efforts.

4. Cultural and Creative Product Experience: I always visit cultural and creative stores during my visits. This time, I was drawn to a hand-drawn picture book titled "The Legend of Fuxi" and a canvas bag featuring Bagua patterns. The picture book vividly tells the story of Fuxi creating the Bagua and teaching farming, making it perfect for children. The canvas bag's minimalist design, with its light-toned Bagua motifs, made my classmates curious when I asked where I bought it. What captivated me was how these items were not only visually appealing but also meaningful, allowing me to share Fuxi culture with more people.

5. Purchase and Sharing Motivation: The picture book is intended as a gift from a future teacher to students. I will tell them this is the story of Fuxi, the cultural progenitor of Zhoukou, who was the earliest 'teacher.' I hope they can learn courage and innovation from the story. The canvas bag is for personal use.

6. The Ideal Cultural and Creative Product: If I were to design one, I would create a "Back-to-School Gift Set" themed around Fuxi culture. The set would include a homework notebook featuring Bagua patterns, a Q-version bookmark of Fuxi, and an eraser engraved with the characters "Inheritance". The notebook's inner pages could be illustrated with short stories about Fuxi, the bookmark could be detachable, and the eraser would have a dragon totem design. The key features are to make it cute and practical, suitable for elementary school students, so they can experience Fuxi culture from their first day of school and feel that traditional culture is close to them.

7. Reflections on Cultural Heritage: I believe integrating education with local culture is the optimal approach. Schools could incorporate Fuxi culture into their curriculum. For instance, primary schools in Zhoukou offer a weekly "Fuxi Culture Class," where children learn about their hometown's heritage through storytelling, handicrafts, and visits to Taihao Mausoleum. Additionally, university student volunteers could be organized to serve as tour guides at Taihao Mausoleum, sharing Fuxi's stories in a youthful and engaging manner, making the content more accessible to visitors.

8. Summary of Overall Value: As a native of Zhoukou and a student majoring in education, my previous understanding of Fuxi culture was limited to its role as an ancestral symbol. This visit to Taihao Mausoleum has made me realize that Fuxi culture is not only a source of pride for my hometown but also a legacy I must pass on as a future teacher. This sense of cultural responsibility will continue to motivate me to study diligently and become an outstanding educator.

**Visitor 20:**

1. First Encounter and Impressions: I first heard of Taihao Mausoleum over thirty years ago when I first moved to Zhengzhou. My mother-in-law told me it was the shrine of Fuxi, the "root" of our Henan people, and that we must visit it. My first trip was with my husband. Back then, transportation was inconvenient, and we spent hours in the car. What struck me most was the incense smoke in the Ancestral Hall, where everyone worshipped with deep devotion. That profound reverence for our ancestors instantly moved me.

2. Perception of Core Cultural Symbols: In my view, the dragon totem and the ancient architecture of Taihao Mausoleum best embody Fuxi culture. The dragon symbolizes the Chinese nation, and Fuxi is revered as the "Dragon Master" —we are all descendants of the dragon. Every time I see the dragon carvings in the mausoleum, I feel a profound sense of familiarity. Moreover, the ancient structures of Taihao Mausoleum, preserved intact for millennia, are like living history. Each brick and tile tells the story of Fuxi, more powerful than any written words.

3. Emotional and Spiritual Connection: As the cultural progenitor, Fuxi's selfless dedication deeply moved me. He taught people farming and weaving without seeking any reward, solely to ensure a better life for future generations. Now as a homemaker, I have devoted my life to my family. Though ordinary, I believe this aligns with Fuxi's spirit—both are about family and descendants, and such devotion is truly worthwhile.

4. Cultural and Creative Product Experience: I always pick up souvenirs whenever I visit. This time, I bought a silk scarf featuring the legendary Fuxi statue and a ceramic teacup shaped like the Bagua. The scarf's intricate design and bold colors make it a perfect match for everyday outfits, while the teacup's exquisite craftsmanship turns it into a daily companion for drinking at home. What truly captivates me is how these items combine practicality with cultural significance, offering a tangible connection to our ancestors' blessings.

5. Reasons for purchase and sharing: The silk scarf was a gift for my daughter. Wearing it not only looks stylish but also brings blessings from our ancestors. The teacup was bought for myself. When neighbors ask about it, I introduce them to the Taihao Mausoleum and suggest they visit to experience its cultural ambiance.

6. The Ideal Cultural and Creative Product: Embroidered Pillow. Choose a soft, comfortable fabric for the pillow, embroidered with Bagua patterns, dragon motifs, or depictions of Fuxi teaching farming. Opt for warm, inviting colors that complement your sofa. The ideal pillow should be both functional and aesthetically pleasing, serving as a decorative piece while promoting Fuxi culture and allowing every household to experience its warmth.

7. Reflections on Cultural Heritage: I believe family transmission is the most vital approach. Elders should share more stories of Fuxi with their children, helping them understand their roots and appreciate the contributions of our ancestors. Additionally, taking children to Taihao Mausoleum for annual worship allows them to experience the cultural ambiance firsthand, ensuring the continuity of Fuxi culture across generations. I now frequently tell my grandson stories about Fuxi, hoping he will remember our ancestors.

8. Overall Value Summary: Witnessing the children grow more sensible and passionate about traditional culture fills me with profound joy—this is the blessing bestowed upon us by Fuxi culture.

**Visitor 21:**

1. First Encounter and Impressions: I first heard of Taihao Mausoleum in my twenties during a trip to Zhoukou with friends, where locals told me about it. This year, I visited for the first time with my family. What struck me most was the profound cultural atmosphere of Taihao Mausoleum, where elements of Fuxi culture are ubiquitous—Bazi diagrams, dragon carvings, and statues of Fuxi. The statue of Fuxi in the Ancestral Hall stands particularly awe-inspiring, its towering and majestic presence evoking a sense of reverence.

2. Core cultural symbol perception: I believe the Eight Trigrams best represent Fuxi culture, embodying the cosmic laws governing all things.

3. Emotional and Spiritual Connection: A Sense of Resonance. As the progenitor of human civilization, Fuxi's selfless dedication and innovative spirit deeply moved me. Now a physician, I dedicate myself to saving lives and healing the wounded daily. Fuxi's story reinforces my understanding that a doctor's duty is to serve patients and contribute to society. His creative spirit also inspires me to continuously learn, innovate, and enhance my medical expertise to better serve patients.

4. Cultural and Creative Product Experience: I noticed several such items and ended up buying a jade pendant shaped like a Chinese zodiac bagua (a traditional Chinese symbol) and a book about the legend of Fuxi. The pendant is believed to bring good luck, while the book is packed with detailed stories and colorful illustrations, making it a fascinating read.

5. Reasons for Purchase and Sharing: The jade pendant was a gift for my husband, a police officer whose job is high-risk. I hope it will bring him safety. The book is for my son, who is now in college. I want to tell him this is the story of Fuxi, our ancestor and the founding father of the Chinese nation, who made great contributions to our people. I hope he studies hard and becomes a valuable member of society in the future.

6. Ideal Cultural and Creative Product: A safety buckle engraved with Bagua patterns, dragon totems, or portraits of Fuxi, with the central buckle designed as movable to symbolize the balance of yin and yang. Key features include exquisite craftsmanship, auspicious symbolism, and suitability for individuals of all age groups, particularly those engaged in high-risk occupations or under significant stress, to safeguard their health and well-being.

7. Reflections on Cultural Heritage: I believe all sectors of society should actively participate in preserving Fuxi culture.

8. Summary of Overall Value: The most valuable takeaway from this visit to Taihao Mausoleum is a spiritual empowerment. As a physician, I often face significant work pressure and frequently experience fatigue. This visit to Taihao Mausoleum, where I learned about Fuxi's innovative spirit and dedication, has reinvigorated my energy. I believe that in my future work, I should emulate Fuxi's spirit, continuously improve my medical expertise, better serve patients, and contribute to society.

**Visitor 22:**

1. First Encounter and Impressions: I first heard of Taihao Mausoleum in a university tourism management course, where the teacher mentioned China's cultural tourism attractions and talked about Taihao Mausoleum and Fuxi culture. This was my first visit, specifically to Henan for a cultural tourism project survey. The most profound impression was that Taihao Mausoleum boasts abundant tourism resources, featuring ancient architectural complexes, profound cultural heritage, and vibrant temple fair culture. Particularly, the massive Bagua diagram evokes a sense of mysterious power, making it highly suitable for developing cultural tourism.

2. Perception of core cultural symbols: After visiting, I believe the Bagua, dragon totem, and temple fair culture best represent Fuxi culture. The Bagua is Fuxi's core creation and the essence of China's traditional culture, with high cultural value; the dragon totem is a symbol of the Chinese nation, highly recognizable, and suitable as a cultural tourism symbol; the temple fair culture is a unique cultural phenomenon of Taihao Mausoleum, attracting a large number of tourists every year, with high tourism value. The combination of these three elements constitutes the core competitiveness of Taihao Mausoleum's cultural tourism.

3. Emotional and Spiritual Connection: Profound Inspiration. Fuxi's pioneering spirit and inclusive mindset deeply moved me. Despite primitive conditions, he invented numerous innovations that transformed human life—a spirit of bold innovation worthy of emulation by tourism professionals. Moreover, Fuxi culture demonstrates remarkable inclusiveness, not only assimilating cultural elements from diverse regions but also exerting profound influence on neighboring nations. This inclusive ethos holds significant implications for developing cultural tourism and creating globally competitive tourist destinations.

4. Cultural and Creative Products Experience: I was particularly drawn to the local cultural and creative products and purchased several items, including Bagua-shaped figurines, dragon-patterned handicrafts, and books on Fuxi culture. The standout was a Bagua-themed souvenir set featuring keychains, bookmarks, and postcards. Its exquisite design combined cultural significance with practicality, making it an ideal travel keepsake that allows visitors to carry the cultural essence of Taihao Mausoleum with them.

5. Purchase and Sharing Motivation: These cultural and creative products are partly for personal use as mementos of this field trip, and partly intended as gifts for my colleagues and superiors. We hope these items will enhance their understanding of Taihao Mausoleum, thereby providing valuable references for our cultural tourism project collaboration.

6. The Ideal Cultural and Creative Experience: If I were to design it, I would create an immersive travel package centered on Fuxi culture. The package would include VR headsets, Fuxi-themed game cards, and hand-drawn maps. Visitors could use VR to experience firsthand Fuxi's legendary creation of the Eight Trigrams and his teachings on farming. The game cards would allow participation in interactive cultural games, while the hand-drawn maps would guide them through the scenic spots and cultural significance of Taihao Mausoleum. The key features are strong interactivity and immersive experiences, enabling visitors to fully appreciate the cultural allure of Taihao Mausoleum.

7. Reflections on Cultural Heritage: I believe cultural tourism is the most effective way to preserve Fuxi culture. By establishing the Taihao Mausoleum as a cultural tourism destination, we can attract more visitors to explore and learn about Fuxi culture. Developing immersive experiences, folk performances, and cultural merchandise themed around Fuxi can enhance tourists' engagement with its charm. Additionally, collaborating with nearby attractions to create Fuxi-themed itineraries will help spread this cultural legacy more widely.

8. Overall Value Summary: The most valuable takeaway from this Taihao Mausoleum trip was the inspiration for a travel project.
