# Supplementary material for: From Cultural Symbols to User Value Construction:A Grounded Theory Study of Heritage-Based Creative Products
Source: Research Square preprint supplement (doi:10.21203/rs.3.rs-8448462/v1), 2026-01-29
Supplement: Supplementary file 5 [file 9929b1f76f139695b7d89aa9.docx]

Archive with 25 entries (17 files):
- ./
- [Content_Types].xml
- _rels/
- _rels/.rels
- customXml/
- customXml/_rels/
- customXml/_rels/item1.xml.rels
- customXml/item1.xml
- customXml/itemProps1.xml
- docProps/
- docProps/app.xml
- docProps/core.xml
- docProps/custom.xml
- word/
- word/_rels/
- word/_rels/document.xml.rels
- word/document.xml
- word/endnotes.xml
- word/fontTable.xml
- word/footer1.xml
- word/footnotes.xml
- word/settings.xml
- word/styles.xml
- word/theme/
- word/theme/theme1.xml
