# Supplementary material for: From Cultural Symbols to User Value Construction:A Grounded Theory Study of Heritage-Based Creative Products
Source: Research Square preprint supplement (doi:10.21203/rs.3.rs-8448462/v1), 2026-01-29
Supplement: Supplementary file 5 [file 9929b1f76f139695b7d89aa9.docx › customXml/item1.xml]

<?xml version="1.0" encoding="UTF-8" standalone="yes"?>
<s:customData xmlns="http://www.wps.cn/officeDocument/2013/wpsCustomData" xmlns:s="http://www.wps.cn/officeDocument/2013/wpsCustomData"><customSectProps/><customShpExts><customShpInfo spid="_x0000_s1026" textRotate="1"/></customShpExts></s:customData>
