# Supplementary material for: From Cultural Symbols to User Value Construction:A Grounded Theory Study of Heritage-Based Creative Products
Source: Research Square preprint supplement (doi:10.21203/rs.3.rs-8448462/v1), 2026-01-29
Supplement: Supplementary file 5 [file 9929b1f76f139695b7d89aa9.docx › customXml/itemProps1.xml]

<?xml version="1.0" encoding="UTF-8" standalone="yes"?>
<ds:datastoreItem ds:itemID="{B1977F7D-205B-4081-913C-38D41E755F92}" xmlns:ds="http://schemas.openxmlformats.org/officeDocument/2006/customXml"><ds:schemaRefs><ds:schemaRef ds:uri="http://www.wps.cn/officeDocument/2013/wpsCustomData"/></ds:schemaRefs></ds:datastoreItem>
