# Supplementary material for: From Cultural Symbols to User Value Construction:A Grounded Theory Study of Heritage-Based Creative Products
Source: Research Square preprint supplement (doi:10.21203/rs.3.rs-8448462/v1), 2026-01-29
Supplement: Supplementary file 5 [file 9929b1f76f139695b7d89aa9.docx › docProps/app.xml]

<?xml version="1.0" encoding="UTF-8" standalone="yes"?>
<Properties xmlns="http://schemas.openxmlformats.org/officeDocument/2006/extended-properties" xmlns:vt="http://schemas.openxmlformats.org/officeDocument/2006/docPropsVTypes"><Template>Normal.dotm</Template><Pages>3</Pages><Words>0</Words><Characters>0</Characters><Lines>0</Lines><Paragraphs>0</Paragraphs><TotalTime>7</TotalTime><ScaleCrop>false</ScaleCrop><LinksUpToDate>false</LinksUpToDate><CharactersWithSpaces>0</CharactersWithSpaces><Application>WPS Office_7.3.1.8967_F1E327BC-269C-435d-A152-05C5408002CA</Application><DocSecurity>0</DocSecurity></Properties>
