# Supplementary material for: From Cultural Symbols to User Value Construction:A Grounded Theory Study of Heritage-Based Creative Products
Source: Research Square preprint supplement (doi:10.21203/rs.3.rs-8448462/v1), 2026-01-29
Supplement: Supplementary file 5 [file 9929b1f76f139695b7d89aa9.docx › docProps/core.xml]

<?xml version="1.0" encoding="UTF-8" standalone="yes"?>
<cp:coreProperties xmlns:cp="http://schemas.openxmlformats.org/package/2006/metadata/core-properties" xmlns:dc="http://purl.org/dc/elements/1.1/" xmlns:dcterms="http://purl.org/dc/terms/" xmlns:dcmitype="http://purl.org/dc/dcmitype/" xmlns:xsi="http://www.w3.org/2001/XMLSchema-instance"><dcterms:created xsi:type="dcterms:W3CDTF">2025-12-25T17:44:00Z</dcterms:created><dc:creator>豆腐</dc:creator><cp:lastModifiedBy>豆腐</cp:lastModifiedBy><dcterms:modified xsi:type="dcterms:W3CDTF">2025-12-25T17:53:40Z</dcterms:modified><cp:revision>1</cp:revision></cp:coreProperties>
