# Supplementary material for: From Cultural Symbols to User Value Construction:A Grounded Theory Study of Heritage-Based Creative Products
Source: Research Square preprint supplement (doi:10.21203/rs.3.rs-8448462/v1), 2026-01-29
Supplement: Supplementary file 5 [file 9929b1f76f139695b7d89aa9.docx › docProps/custom.xml]

<?xml version="1.0" encoding="UTF-8" standalone="yes"?>
<Properties xmlns="http://schemas.openxmlformats.org/officeDocument/2006/custom-properties" xmlns:vt="http://schemas.openxmlformats.org/officeDocument/2006/docPropsVTypes"><property fmtid="{D5CDD505-2E9C-101B-9397-08002B2CF9AE}" pid="2" name="KSOProductBuildVer"><vt:lpwstr>2052-7.3.1.8967</vt:lpwstr></property><property fmtid="{D5CDD505-2E9C-101B-9397-08002B2CF9AE}" pid="3" name="ICV"><vt:lpwstr>D04FF26964C46F1463074D698B0B5CBF_41</vt:lpwstr></property></Properties>
