# Supplementary material for: From Cultural Symbols to User Value Construction:A Grounded Theory Study of Heritage-Based Creative Products
Source: Research Square preprint supplement (doi:10.21203/rs.3.rs-8448462/v1), 2026-01-29
Supplement: Supplementary file 5 [file 9929b1f76f139695b7d89aa9.docx › word/document.xml]

<?xml version="1.0" encoding="UTF-8" standalone="yes"?><w:document xmlns:wpc="http://schemas.microsoft.com/office/word/2010/wordprocessingCanvas" xmlns:mc="http://schemas.openxmlformats.org/markup-compatibility/2006" xmlns:o="urn:schemas-microsoft-com:office:office" xmlns:r="http://schemas.openxmlformats.org/officeDocument/2006/relationships" xmlns:m="http://schemas.openxmlformats.org/officeDocument/2006/math" xmlns:v="urn:schemas-microsoft-com:vml" xmlns:wp14="http://schemas.microsoft.com/office/word/2010/wordprocessingDrawing" xmlns:wp="http://schemas.openxmlformats.org/drawingml/2006/wordprocessingDrawing" xmlns:w="http://schemas.openxmlformats.org/wordprocessingml/2006/main" xmlns:w14="http://schemas.microsoft.com/office/word/2010/wordml" xmlns:w10="urn:schemas-microsoft-com:office:word" xmlns:w15="http://schemas.microsoft.com/office/word/2012/wordml" xmlns:wpg="http://schemas.microsoft.com/office/word/2010/wordprocessingGroup" xmlns:wpi="http://schemas.microsoft.com/office/word/2010/wordprocessingInk" xmlns:wne="http://schemas.microsoft.com/office/word/2006/wordml" xmlns:wps="http://schemas.microsoft.com/office/word/2010/wordprocessingShape" xmlns:wpsCustomData="http://www.wps.cn/officeDocument/2013/wpsCustomData" mc:Ignorable="w14 w15 wp14"><w:body><w:p w14:paraId="3602B8A3"><w:pPr><w:bidi w:val="0"></w:bidi><w:rPr><w:rFonts w:hint="eastAsia"></w:rFonts><w:lang w:val="en-US" w:eastAsia="zh-CN"></w:lang></w:rPr></w:pPr></w:p><w:p w14:paraId="145AEABC"><w:pPr><w:bidi w:val="0"></w:bidi><w:jc w:val="center"></w:jc><w:rPr><w:rFonts w:hint="default"></w:rFonts><w:lang w:val="en-US" w:eastAsia="zh-CN"></w:lang></w:rPr></w:pPr><w:r><w:rPr><w:rFonts w:hint="eastAsia"></w:rFonts><w:lang w:val="en-US" w:eastAsia="zh-CN"></w:lang></w:rPr><w:t>Table1 Open encoding process</w:t></w:r><w:bookmarkStart w:id="0" w:name="_GoBack"></w:bookmarkStart><w:bookmarkEnd w:id="0"></w:bookmarkEnd></w:p><w:tbl><w:tblPr><w:tblStyle w:val="7"></w:tblStyle><w:tblW w:w="9235" w:type="dxa"></w:tblW><w:jc w:val="center"></w:jc><w:tblBorders><w:top w:val="single" w:color="008000" w:sz="12" w:space="0"></w:top><w:left w:val="none" w:color="auto" w:sz="0" w:space="0"></w:left><w:bottom w:val="single" w:color="auto" w:sz="18" w:space="0"></w:bottom><w:right w:val="none" w:color="auto" w:sz="0" w:space="0"></w:right><w:insideH w:val="none" w:color="auto" w:sz="0" w:space="0"></w:insideH><w:insideV w:val="none" w:color="auto" w:sz="0" w:space="0"></w:insideV></w:tblBorders><w:tblLayout w:type="fixed"></w:tblLayout><w:tblCellMar><w:top w:w="0" w:type="dxa"></w:top><w:left w:w="108" w:type="dxa"></w:left><w:bottom w:w="0" w:type="dxa"></w:bottom><w:right w:w="108" w:type="dxa"></w:right></w:tblCellMar></w:tblPr><w:tblGrid><w:gridCol w:w="1571"></w:gridCol><w:gridCol w:w="2034"></w:gridCol><w:gridCol w:w="1755"></w:gridCol><w:gridCol w:w="3875"></w:gridCol></w:tblGrid><w:tr w14:paraId="2C159415"><w:tblPrEx><w:tblBorders><w:top w:val="single" w:color="008000" w:sz="12" w:space="0"></w:top><w:left w:val="none" w:color="auto" w:sz="0" w:space="0"></w:left><w:bottom w:val="single" w:color="auto" w:sz="18" w:space="0"></w:bottom><w:right w:val="none" w:color="auto" w:sz="0" w:space="0"></w:right><w:insideH w:val="none" w:color="auto" w:sz="0" w:space="0"></w:insideH><w:insideV w:val="none" w:color="auto" w:sz="0" w:space="0"></w:insideV></w:tblBorders></w:tblPrEx><w:trPr><w:trHeight w:val="375" w:hRule="atLeast"></w:trHeight><w:jc w:val="center"></w:jc></w:trPr><w:tc><w:tcPr><w:tcW w:w="5360" w:type="dxa"></w:tcW><w:gridSpan w:val="3"></w:gridSpan><w:tcBorders><w:top w:val="single" w:color="auto" w:sz="18" w:space="0"></w:top><w:bottom w:val="single" w:color="auto" w:sz="18" w:space="0"></w:bottom></w:tcBorders><w:noWrap w:val="0"></w:noWrap><w:vAlign w:val="center"></w:vAlign></w:tcPr><w:p w14:paraId="7B963FE2"><w:pPr><w:bidi w:val="0"></w:bidi><w:rPr><w:rFonts w:hint="default"></w:rFonts><w:sz w:val="16"></w:sz><w:szCs w:val="20"></w:szCs><w:lang w:val="en-US" w:eastAsia="zh-CN"></w:lang></w:rPr></w:pPr><w:r><w:rPr><w:rFonts w:hint="default"></w:rFonts><w:sz w:val="16"></w:sz><w:szCs w:val="20"></w:szCs><w:lang w:val="en-US" w:eastAsia="zh-CN"></w:lang></w:rPr><w:t>open coding</w:t></w:r></w:p></w:tc><w:tc><w:tcPr><w:tcW w:w="3875" w:type="dxa"></w:tcW><w:vMerge w:val="restart"></w:vMerge><w:tcBorders><w:top w:val="single" w:color="auto" w:sz="18" w:space="0"></w:top></w:tcBorders><w:noWrap w:val="0"></w:noWrap><w:vAlign w:val="center"></w:vAlign></w:tcPr><w:p w14:paraId="1F468AE5"><w:pPr><w:bidi w:val="0"></w:bidi><w:rPr><w:rFonts w:hint="default"></w:rFonts><w:sz w:val="16"></w:sz><w:szCs w:val="20"></w:szCs><w:lang w:val="en-US" w:eastAsia="zh-CN"></w:lang></w:rPr></w:pPr><w:r><w:rPr><w:rFonts w:hint="default"></w:rFonts><w:sz w:val="16"></w:sz><w:szCs w:val="20"></w:szCs><w:lang w:val="en-US" w:eastAsia="zh-CN"></w:lang></w:rPr><w:t>Original textual materials</w:t></w:r></w:p></w:tc></w:tr><w:tr w14:paraId="19E6CDA4"><w:tblPrEx><w:tblBorders><w:top w:val="single" w:color="008000" w:sz="12" w:space="0"></w:top><w:left w:val="none" w:color="auto" w:sz="0" w:space="0"></w:left><w:bottom w:val="single" w:color="auto" w:sz="18" w:space="0"></w:bottom><w:right w:val="none" w:color="auto" w:sz="0" w:space="0"></w:right><w:insideH w:val="none" w:color="auto" w:sz="0" w:space="0"></w:insideH><w:insideV w:val="none" w:color="auto" w:sz="0" w:space="0"></w:insideV></w:tblBorders></w:tblPrEx><w:trPr><w:trHeight w:val="375" w:hRule="atLeast"></w:trHeight><w:jc w:val="center"></w:jc></w:trPr><w:tc><w:tcPr><w:tcW w:w="1571" w:type="dxa"></w:tcW><w:tcBorders><w:top w:val="single" w:color="auto" w:sz="18" w:space="0"></w:top><w:bottom w:val="nil"></w:bottom><w:right w:val="nil"></w:right></w:tcBorders><w:shd w:val="clear" w:color="auto" w:fill="auto"></w:shd><w:noWrap w:val="0"></w:noWrap><w:vAlign w:val="center"></w:vAlign></w:tcPr><w:p w14:paraId="19532040"><w:pPr><w:bidi w:val="0"></w:bidi><w:rPr><w:rFonts w:hint="default"></w:rFonts><w:sz w:val="16"></w:sz><w:szCs w:val="20"></w:szCs><w:lang w:val="en-US" w:eastAsia="zh-CN"></w:lang></w:rPr></w:pPr><w:r><w:rPr><w:rFonts w:hint="default"></w:rFonts><w:sz w:val="16"></w:sz><w:szCs w:val="20"></w:szCs><w:lang w:val="en-US" w:eastAsia="zh-CN"></w:lang></w:rPr><w:t>The initial categorization of 15</w:t></w:r><w:r><w:rPr><w:rFonts w:hint="eastAsia"></w:rFonts><w:sz w:val="16"></w:sz><w:szCs w:val="20"></w:szCs><w:lang w:val="en-US" w:eastAsia="zh-CN"></w:lang></w:rPr><w:t></w:t></w:r></w:p></w:tc><w:tc><w:tcPr><w:tcW w:w="2034" w:type="dxa"></w:tcW><w:tcBorders><w:top w:val="single" w:color="auto" w:sz="18" w:space="0"></w:top><w:left w:val="nil"></w:left><w:bottom w:val="nil"></w:bottom><w:right w:val="nil"></w:right></w:tcBorders><w:shd w:val="clear" w:color="auto" w:fill="auto"></w:shd><w:noWrap w:val="0"></w:noWrap><w:vAlign w:val="center"></w:vAlign></w:tcPr><w:p w14:paraId="583B711E"><w:pPr><w:bidi w:val="0"></w:bidi><w:rPr><w:rFonts w:hint="default"></w:rFonts><w:sz w:val="16"></w:sz><w:szCs w:val="20"></w:szCs><w:lang w:val="en-US" w:eastAsia="zh-CN"></w:lang></w:rPr></w:pPr><w:r><w:rPr><w:rFonts w:hint="default"></w:rFonts><w:sz w:val="16"></w:sz><w:szCs w:val="20"></w:szCs><w:lang w:val="en-US" w:eastAsia="zh-CN"></w:lang></w:rPr><w:t>Conceptualize 35</w:t></w:r><w:r><w:rPr><w:rFonts w:hint="eastAsia"></w:rFonts><w:sz w:val="16"></w:sz><w:szCs w:val="20"></w:szCs><w:lang w:val="en-US" w:eastAsia="zh-CN"></w:lang></w:rPr><w:t></w:t></w:r></w:p></w:tc><w:tc><w:tcPr><w:tcW w:w="1755" w:type="dxa"></w:tcW><w:tcBorders><w:top w:val="single" w:color="auto" w:sz="18" w:space="0"></w:top><w:left w:val="nil"></w:left><w:bottom w:val="nil"></w:bottom></w:tcBorders><w:shd w:val="clear" w:color="auto" w:fill="auto"></w:shd><w:noWrap w:val="0"></w:noWrap><w:vAlign w:val="center"></w:vAlign></w:tcPr><w:p w14:paraId="56D5356A"><w:pPr><w:bidi w:val="0"></w:bidi><w:rPr><w:rFonts w:hint="default"></w:rFonts><w:sz w:val="16"></w:sz><w:szCs w:val="20"></w:szCs><w:lang w:val="en-US" w:eastAsia="zh-CN"></w:lang></w:rPr></w:pPr><w:r><w:rPr><w:rFonts w:hint="default"></w:rFonts><w:sz w:val="16"></w:sz><w:szCs w:val="20"></w:szCs><w:lang w:val="en-US" w:eastAsia="zh-CN"></w:lang></w:rPr><w:t>64 tags</w:t></w:r><w:r><w:rPr><w:rFonts w:hint="eastAsia"></w:rFonts><w:sz w:val="16"></w:sz><w:szCs w:val="20"></w:szCs><w:lang w:val="en-US" w:eastAsia="zh-CN"></w:lang></w:rPr><w:t></w:t></w:r></w:p></w:tc><w:tc><w:tcPr><w:tcW w:w="3875" w:type="dxa"></w:tcW><w:vMerge w:val="continue"></w:vMerge><w:tcBorders><w:bottom w:val="nil"></w:bottom></w:tcBorders><w:shd w:val="clear" w:color="auto" w:fill="auto"></w:shd><w:noWrap w:val="0"></w:noWrap><w:vAlign w:val="center"></w:vAlign></w:tcPr><w:p w14:paraId="0CF36F8D"><w:pPr><w:bidi w:val="0"></w:bidi><w:rPr><w:rFonts w:hint="default"></w:rFonts><w:sz w:val="16"></w:sz><w:szCs w:val="20"></w:szCs><w:lang w:val="en-US" w:eastAsia="zh-CN"></w:lang></w:rPr></w:pPr></w:p></w:tc></w:tr><w:tr w14:paraId="7CFBC4C2"><w:tblPrEx><w:tblBorders><w:top w:val="single" w:color="008000" w:sz="12" w:space="0"></w:top><w:left w:val="none" w:color="auto" w:sz="0" w:space="0"></w:left><w:bottom w:val="single" w:color="auto" w:sz="18" w:space="0"></w:bottom><w:right w:val="none" w:color="auto" w:sz="0" w:space="0"></w:right><w:insideH w:val="none" w:color="auto" w:sz="0" w:space="0"></w:insideH><w:insideV w:val="none" w:color="auto" w:sz="0" w:space="0"></w:insideV></w:tblBorders></w:tblPrEx><w:trPr><w:trHeight w:val="90" w:hRule="atLeast"></w:trHeight><w:jc w:val="center"></w:jc></w:trPr><w:tc><w:tcPr><w:tcW w:w="1571" w:type="dxa"></w:tcW><w:tcBorders><w:top w:val="nil"></w:top><w:bottom w:val="nil"></w:bottom></w:tcBorders><w:noWrap w:val="0"></w:noWrap><w:vAlign w:val="center"></w:vAlign></w:tcPr><w:p w14:paraId="60AA4BF7"><w:pPr><w:bidi w:val="0"></w:bidi><w:rPr><w:rFonts w:hint="default"></w:rFonts><w:sz w:val="16"></w:sz><w:szCs w:val="20"></w:szCs><w:lang w:val="en-US" w:eastAsia="zh-CN"></w:lang></w:rPr></w:pPr><w:r><w:rPr><w:rFonts w:hint="default"></w:rFonts><w:sz w:val="16"></w:sz><w:szCs w:val="20"></w:szCs><w:lang w:val="en-US" w:eastAsia="zh-CN"></w:lang></w:rPr><w:t>FF1 Belonging Satisfaction (F2, F15, F16)</w:t></w:r></w:p><w:p w14:paraId="740B0505"><w:pPr><w:bidi w:val="0"></w:bidi><w:rPr><w:rFonts w:hint="default"></w:rFonts><w:sz w:val="16"></w:sz><w:szCs w:val="20"></w:szCs><w:lang w:val="en-US" w:eastAsia="zh-CN"></w:lang></w:rPr></w:pPr><w:r><w:rPr><w:rFonts w:hint="default"></w:rFonts><w:sz w:val="16"></w:sz><w:szCs w:val="20"></w:szCs><w:lang w:val="en-US" w:eastAsia="zh-CN"></w:lang></w:rPr><w:t>FF2 policy support (F6, F31)</w:t></w:r></w:p><w:p w14:paraId="14DE0F09"><w:pPr><w:bidi w:val="0"></w:bidi><w:rPr><w:rFonts w:hint="default"></w:rFonts><w:sz w:val="16"></w:sz><w:szCs w:val="20"></w:szCs><w:lang w:val="en-US" w:eastAsia="zh-CN"></w:lang></w:rPr></w:pPr><w:r><w:rPr><w:rFonts w:hint="default"></w:rFonts><w:sz w:val="16"></w:sz><w:szCs w:val="20"></w:szCs><w:lang w:val="en-US" w:eastAsia="zh-CN"></w:lang></w:rPr><w:t>FF3 Trend Tags (F10, F28)</w:t></w:r></w:p><w:p w14:paraId="72DE6B92"><w:pPr><w:bidi w:val="0"></w:bidi><w:rPr><w:rFonts w:hint="default"></w:rFonts><w:sz w:val="16"></w:sz><w:szCs w:val="20"></w:szCs><w:lang w:val="en-US" w:eastAsia="zh-CN"></w:lang></w:rPr></w:pPr><w:r><w:rPr><w:rFonts w:hint="default"></w:rFonts><w:sz w:val="16"></w:sz><w:szCs w:val="20"></w:szCs><w:lang w:val="en-US" w:eastAsia="zh-CN"></w:lang></w:rPr><w:t>FF4 Creative Design (F3, F17, F27)</w:t></w:r></w:p><w:p w14:paraId="50DD4E12"><w:pPr><w:bidi w:val="0"></w:bidi><w:rPr><w:rFonts w:hint="default"></w:rFonts><w:sz w:val="16"></w:sz><w:szCs w:val="20"></w:szCs><w:lang w:val="en-US" w:eastAsia="zh-CN"></w:lang></w:rPr></w:pPr><w:r><w:rPr><w:rFonts w:hint="default"></w:rFonts><w:sz w:val="16"></w:sz><w:szCs w:val="20"></w:szCs><w:lang w:val="en-US" w:eastAsia="zh-CN"></w:lang></w:rPr><w:t>FF5 Cultural Identity (F12, F19, F26)</w:t></w:r></w:p><w:p w14:paraId="404E314D"><w:pPr><w:bidi w:val="0"></w:bidi><w:rPr><w:rFonts w:hint="default"></w:rFonts><w:sz w:val="16"></w:sz><w:szCs w:val="20"></w:szCs><w:lang w:val="en-US" w:eastAsia="zh-CN"></w:lang></w:rPr></w:pPr><w:r><w:rPr><w:rFonts w:hint="default"></w:rFonts><w:sz w:val="16"></w:sz><w:szCs w:val="20"></w:szCs><w:lang w:val="en-US" w:eastAsia="zh-CN"></w:lang></w:rPr><w:t>FF6 Gift Economy (F4, F14)</w:t></w:r></w:p><w:p w14:paraId="5809E708"><w:pPr><w:bidi w:val="0"></w:bidi><w:rPr><w:rFonts w:hint="default"></w:rFonts><w:sz w:val="16"></w:sz><w:szCs w:val="20"></w:szCs><w:lang w:val="en-US" w:eastAsia="zh-CN"></w:lang></w:rPr></w:pPr><w:r><w:rPr><w:rFonts w:hint="default"></w:rFonts><w:sz w:val="16"></w:sz><w:szCs w:val="20"></w:szCs><w:lang w:val="en-US" w:eastAsia="zh-CN"></w:lang></w:rPr><w:t>FF7 Color Aesthetics (F21, F32)</w:t></w:r></w:p><w:p w14:paraId="7C221FCF"><w:pPr><w:bidi w:val="0"></w:bidi><w:rPr><w:rFonts w:hint="default"></w:rFonts><w:sz w:val="16"></w:sz><w:szCs w:val="20"></w:szCs><w:lang w:val="en-US" w:eastAsia="zh-CN"></w:lang></w:rPr></w:pPr><w:r><w:rPr><w:rFonts w:hint="default"></w:rFonts><w:sz w:val="16"></w:sz><w:szCs w:val="20"></w:szCs><w:lang w:val="en-US" w:eastAsia="zh-CN"></w:lang></w:rPr><w:t>FF8 nostalgia (F8, F25, F30)</w:t></w:r></w:p><w:p w14:paraId="787683EE"><w:pPr><w:bidi w:val="0"></w:bidi><w:rPr><w:rFonts w:hint="default"></w:rFonts><w:sz w:val="16"></w:sz><w:szCs w:val="20"></w:szCs><w:lang w:val="en-US" w:eastAsia="zh-CN"></w:lang></w:rPr></w:pPr><w:r><w:rPr><w:rFonts w:hint="default"></w:rFonts><w:sz w:val="16"></w:sz><w:szCs w:val="20"></w:szCs><w:lang w:val="en-US" w:eastAsia="zh-CN"></w:lang></w:rPr><w:t>FF9 Environmental Protection (F9, F33)</w:t></w:r></w:p><w:p w14:paraId="115B73EB"><w:pPr><w:bidi w:val="0"></w:bidi><w:rPr><w:rFonts w:hint="default"></w:rFonts><w:sz w:val="16"></w:sz><w:szCs w:val="20"></w:szCs><w:lang w:val="en-US" w:eastAsia="zh-CN"></w:lang></w:rPr></w:pPr><w:r><w:rPr><w:rFonts w:hint="default"></w:rFonts><w:sz w:val="16"></w:sz><w:szCs w:val="20"></w:szCs><w:lang w:val="en-US" w:eastAsia="zh-CN"></w:lang></w:rPr><w:t>FF10s refined aesthetic (F7, F5)</w:t></w:r></w:p><w:p w14:paraId="5FA9346A"><w:pPr><w:bidi w:val="0"></w:bidi><w:rPr><w:rFonts w:hint="default"></w:rFonts><w:sz w:val="16"></w:sz><w:szCs w:val="20"></w:szCs><w:lang w:val="en-US" w:eastAsia="zh-CN"></w:lang></w:rPr></w:pPr><w:r><w:rPr><w:rFonts w:hint="default"></w:rFonts><w:sz w:val="16"></w:sz><w:szCs w:val="20"></w:szCs><w:lang w:val="en-US" w:eastAsia="zh-CN"></w:lang></w:rPr><w:t>FF11 is a great value for money (F22, F34)</w:t></w:r></w:p><w:p w14:paraId="42CAFC81"><w:pPr><w:bidi w:val="0"></w:bidi><w:rPr><w:rFonts w:hint="default"></w:rFonts><w:sz w:val="16"></w:sz><w:szCs w:val="20"></w:szCs><w:lang w:val="en-US" w:eastAsia="zh-CN"></w:lang></w:rPr></w:pPr><w:r><w:rPr><w:rFonts w:hint="default"></w:rFonts><w:sz w:val="16"></w:sz><w:szCs w:val="20"></w:szCs><w:lang w:val="en-US" w:eastAsia="zh-CN"></w:lang></w:rPr><w:t>FF12 group interaction (F11, F13)</w:t></w:r></w:p><w:p w14:paraId="62CDC0AB"><w:pPr><w:bidi w:val="0"></w:bidi><w:rPr><w:rFonts w:hint="default"></w:rFonts><w:sz w:val="16"></w:sz><w:szCs w:val="20"></w:szCs><w:lang w:val="en-US" w:eastAsia="zh-CN"></w:lang></w:rPr></w:pPr><w:r><w:rPr><w:rFonts w:hint="default"></w:rFonts><w:sz w:val="16"></w:sz><w:szCs w:val="20"></w:szCs><w:lang w:val="en-US" w:eastAsia="zh-CN"></w:lang></w:rPr><w:t>FF13 product materials (F23, F35)</w:t></w:r></w:p><w:p w14:paraId="5A5082BF"><w:pPr><w:bidi w:val="0"></w:bidi><w:rPr><w:rFonts w:hint="default"></w:rFonts><w:sz w:val="16"></w:sz><w:szCs w:val="20"></w:szCs><w:lang w:val="en-US" w:eastAsia="zh-CN"></w:lang></w:rPr></w:pPr><w:r><w:rPr><w:rFonts w:hint="default"></w:rFonts><w:sz w:val="16"></w:sz><w:szCs w:val="20"></w:szCs><w:lang w:val="en-US" w:eastAsia="zh-CN"></w:lang></w:rPr><w:t>FF14 Experience (F18, F29)</w:t></w:r></w:p><w:p w14:paraId="5A0369C7"><w:pPr><w:bidi w:val="0"></w:bidi><w:rPr><w:rFonts w:hint="default"></w:rFonts><w:sz w:val="16"></w:sz><w:szCs w:val="20"></w:szCs><w:lang w:val="en-US" w:eastAsia="zh-CN"></w:lang></w:rPr></w:pPr><w:r><w:rPr><w:rFonts w:hint="default"></w:rFonts><w:sz w:val="16"></w:sz><w:szCs w:val="20"></w:szCs><w:lang w:val="en-US" w:eastAsia="zh-CN"></w:lang></w:rPr><w:t>FF15 Cultural Exchange (F1, F20, F24)</w:t></w:r></w:p><w:p w14:paraId="64FA67BE"><w:pPr><w:bidi w:val="0"></w:bidi><w:rPr><w:rFonts w:hint="default"></w:rFonts><w:sz w:val="16"></w:sz><w:szCs w:val="20"></w:szCs><w:lang w:val="en-US" w:eastAsia="zh-CN"></w:lang></w:rPr></w:pPr></w:p></w:tc><w:tc><w:tcPr><w:tcW w:w="2034" w:type="dxa"></w:tcW><w:tcBorders><w:top w:val="nil"></w:top><w:bottom w:val="nil"></w:bottom></w:tcBorders><w:noWrap w:val="0"></w:noWrap><w:vAlign w:val="center"></w:vAlign></w:tcPr><w:p w14:paraId="0BAFCED2"><w:pPr><w:bidi w:val="0"></w:bidi><w:rPr><w:rFonts w:hint="default"></w:rFonts><w:sz w:val="16"></w:sz><w:szCs w:val="20"></w:szCs><w:lang w:val="en-US" w:eastAsia="zh-CN"></w:lang></w:rPr></w:pPr><w:r><w:rPr><w:rFonts w:hint="default"></w:rFonts><w:sz w:val="16"></w:sz><w:szCs w:val="20"></w:szCs><w:lang w:val="en-US" w:eastAsia="zh-CN"></w:lang></w:rPr><w:t>F1 regional cultural characteristics (f3, f17)</w:t></w:r></w:p><w:p w14:paraId="326B1CA4"><w:pPr><w:bidi w:val="0"></w:bidi><w:rPr><w:rFonts w:hint="default"></w:rFonts><w:sz w:val="16"></w:sz><w:szCs w:val="20"></w:szCs><w:lang w:val="en-US" w:eastAsia="zh-CN"></w:lang></w:rPr></w:pPr><w:r><w:rPr><w:rFonts w:hint="default"></w:rFonts><w:sz w:val="16"></w:sz><w:szCs w:val="20"></w:szCs><w:lang w:val="en-US" w:eastAsia="zh-CN"></w:lang></w:rPr><w:t>F2 emotional belonging satisfaction (f5, f20, f34)</w:t></w:r></w:p><w:p w14:paraId="048BD88D"><w:pPr><w:bidi w:val="0"></w:bidi><w:rPr><w:rFonts w:hint="default"></w:rFonts><w:sz w:val="16"></w:sz><w:szCs w:val="20"></w:szCs><w:lang w:val="en-US" w:eastAsia="zh-CN"></w:lang></w:rPr></w:pPr><w:r><w:rPr><w:rFonts w:hint="default"></w:rFonts><w:sz w:val="16"></w:sz><w:szCs w:val="20"></w:szCs><w:lang w:val="en-US" w:eastAsia="zh-CN"></w:lang></w:rPr><w:t>F3 Innovative Design Awareness (f10, f24)</w:t></w:r></w:p><w:p w14:paraId="3D10EC2D"><w:pPr><w:bidi w:val="0"></w:bidi><w:rPr><w:rFonts w:hint="default"></w:rFonts><w:sz w:val="16"></w:sz><w:szCs w:val="20"></w:szCs><w:lang w:val="en-US" w:eastAsia="zh-CN"></w:lang></w:rPr></w:pPr><w:r><w:rPr><w:rFonts w:hint="default"></w:rFonts><w:sz w:val="16"></w:sz><w:szCs w:val="20"></w:szCs><w:lang w:val="en-US" w:eastAsia="zh-CN"></w:lang></w:rPr><w:t>The F4 generations creative approach is rather unconventional (f15).</w:t></w:r></w:p><w:p w14:paraId="1E056414"><w:pPr><w:bidi w:val="0"></w:bidi><w:rPr><w:rFonts w:hint="default"></w:rFonts><w:sz w:val="16"></w:sz><w:szCs w:val="20"></w:szCs><w:lang w:val="en-US" w:eastAsia="zh-CN"></w:lang></w:rPr></w:pPr><w:r><w:rPr><w:rFonts w:hint="default"></w:rFonts><w:sz w:val="16"></w:sz><w:szCs w:val="20"></w:szCs><w:lang w:val="en-US" w:eastAsia="zh-CN"></w:lang></w:rPr><w:t>F5 Packaging Importance (f26)</w:t></w:r></w:p><w:p w14:paraId="0828FCB5"><w:pPr><w:bidi w:val="0"></w:bidi><w:rPr><w:rFonts w:hint="default"></w:rFonts><w:sz w:val="16"></w:sz><w:szCs w:val="20"></w:szCs><w:lang w:val="en-US" w:eastAsia="zh-CN"></w:lang></w:rPr></w:pPr><w:r><w:rPr><w:rFonts w:hint="default"></w:rFonts><w:sz w:val="16"></w:sz><w:szCs w:val="20"></w:szCs><w:lang w:val="en-US" w:eastAsia="zh-CN"></w:lang></w:rPr><w:t>F6 policy document support (f1)</w:t></w:r></w:p><w:p w14:paraId="694FC107"><w:pPr><w:bidi w:val="0"></w:bidi><w:rPr><w:rFonts w:hint="default"></w:rFonts><w:sz w:val="16"></w:sz><w:szCs w:val="20"></w:szCs><w:lang w:val="en-US" w:eastAsia="zh-CN"></w:lang></w:rPr></w:pPr><w:r><w:rPr><w:rFonts w:hint="default"></w:rFonts><w:sz w:val="16"></w:sz><w:szCs w:val="20"></w:szCs><w:lang w:val="en-US" w:eastAsia="zh-CN"></w:lang></w:rPr><w:t>F7: Intangible Cultural Heritage – Rough Handicrafts (f35)</w:t></w:r></w:p><w:p w14:paraId="54F45C6A"><w:pPr><w:bidi w:val="0"></w:bidi><w:rPr><w:rFonts w:hint="default"></w:rFonts><w:sz w:val="16"></w:sz><w:szCs w:val="20"></w:szCs><w:lang w:val="en-US" w:eastAsia="zh-CN"></w:lang></w:rPr></w:pPr><w:r><w:rPr><w:rFonts w:hint="default"></w:rFonts><w:sz w:val="16"></w:sz><w:szCs w:val="20"></w:szCs><w:lang w:val="en-US" w:eastAsia="zh-CN"></w:lang></w:rPr><w:t>The F8 product evokes nostalgic memories of its predecessors (F8, F63).</w:t></w:r></w:p><w:p w14:paraId="6C741CFB"><w:pPr><w:bidi w:val="0"></w:bidi><w:rPr><w:rFonts w:hint="default"></w:rFonts><w:sz w:val="16"></w:sz><w:szCs w:val="20"></w:szCs><w:lang w:val="en-US" w:eastAsia="zh-CN"></w:lang></w:rPr></w:pPr><w:r><w:rPr><w:rFonts w:hint="default"></w:rFonts><w:sz w:val="16"></w:sz><w:szCs w:val="20"></w:szCs><w:lang w:val="en-US" w:eastAsia="zh-CN"></w:lang></w:rPr><w:t>Use of F9 sustainable materials (f13, f18)</w:t></w:r></w:p><w:p w14:paraId="45F0E256"><w:pPr><w:bidi w:val="0"></w:bidi><w:rPr><w:rFonts w:hint="default"></w:rFonts><w:sz w:val="16"></w:sz><w:szCs w:val="20"></w:szCs><w:lang w:val="en-US" w:eastAsia="zh-CN"></w:lang></w:rPr></w:pPr><w:r><w:rPr><w:rFonts w:hint="default"></w:rFonts><w:sz w:val="16"></w:sz><w:szCs w:val="20"></w:szCs><w:lang w:val="en-US" w:eastAsia="zh-CN"></w:lang></w:rPr><w:t>F10 China-fashion style (f31, f37)</w:t></w:r></w:p><w:p w14:paraId="694485A4"><w:pPr><w:bidi w:val="0"></w:bidi><w:rPr><w:rFonts w:hint="default"></w:rFonts><w:sz w:val="16"></w:sz><w:szCs w:val="20"></w:szCs><w:lang w:val="en-US" w:eastAsia="zh-CN"></w:lang></w:rPr></w:pPr><w:r><w:rPr><w:rFonts w:hint="default"></w:rFonts><w:sz w:val="16"></w:sz><w:szCs w:val="20"></w:szCs><w:lang w:val="en-US" w:eastAsia="zh-CN"></w:lang></w:rPr><w:t>F11 Gift Give (f7, f36)</w:t></w:r></w:p><w:p w14:paraId="2D27239F"><w:pPr><w:bidi w:val="0"></w:bidi><w:rPr><w:rFonts w:hint="default"></w:rFonts><w:sz w:val="16"></w:sz><w:szCs w:val="20"></w:szCs><w:lang w:val="en-US" w:eastAsia="zh-CN"></w:lang></w:rPr></w:pPr><w:r><w:rPr><w:rFonts w:hint="default"></w:rFonts><w:sz w:val="16"></w:sz><w:szCs w:val="20"></w:szCs><w:lang w:val="en-US" w:eastAsia="zh-CN"></w:lang></w:rPr><w:t>F12 actively promotes culture (f22, f40)</w:t></w:r></w:p><w:p w14:paraId="6A4159A2"><w:pPr><w:bidi w:val="0"></w:bidi><w:rPr><w:rFonts w:hint="default"></w:rFonts><w:sz w:val="16"></w:sz><w:szCs w:val="20"></w:szCs><w:lang w:val="en-US" w:eastAsia="zh-CN"></w:lang></w:rPr></w:pPr><w:r><w:rPr><w:rFonts w:hint="default"></w:rFonts><w:sz w:val="16"></w:sz><w:szCs w:val="20"></w:szCs><w:lang w:val="en-US" w:eastAsia="zh-CN"></w:lang></w:rPr><w:t>F13 Social Purpose Purchase (f23)</w:t></w:r></w:p><w:p w14:paraId="7959A690"><w:pPr><w:bidi w:val="0"></w:bidi><w:rPr><w:rFonts w:hint="default"></w:rFonts><w:sz w:val="16"></w:sz><w:szCs w:val="20"></w:szCs><w:lang w:val="en-US" w:eastAsia="zh-CN"></w:lang></w:rPr></w:pPr><w:r><w:rPr><w:rFonts w:hint="default"></w:rFonts><w:sz w:val="16"></w:sz><w:szCs w:val="20"></w:szCs><w:lang w:val="en-US" w:eastAsia="zh-CN"></w:lang></w:rPr><w:t>F14 Novel and unique (f14, f25)</w:t></w:r></w:p><w:p w14:paraId="125D8A0C"><w:pPr><w:bidi w:val="0"></w:bidi><w:rPr><w:rFonts w:hint="default"></w:rFonts><w:sz w:val="16"></w:sz><w:szCs w:val="20"></w:szCs><w:lang w:val="en-US" w:eastAsia="zh-CN"></w:lang></w:rPr></w:pPr><w:r><w:rPr><w:rFonts w:hint="default"></w:rFonts><w:sz w:val="16"></w:sz><w:szCs w:val="20"></w:szCs><w:lang w:val="en-US" w:eastAsia="zh-CN"></w:lang></w:rPr><w:t>F15 Psychological Pleasure (f19)</w:t></w:r></w:p><w:p w14:paraId="6A10B09E"><w:pPr><w:bidi w:val="0"></w:bidi><w:rPr><w:rFonts w:hint="default"></w:rFonts><w:sz w:val="16"></w:sz><w:szCs w:val="20"></w:szCs><w:lang w:val="en-US" w:eastAsia="zh-CN"></w:lang></w:rPr></w:pPr><w:r><w:rPr><w:rFonts w:hint="default"></w:rFonts><w:sz w:val="16"></w:sz><w:szCs w:val="20"></w:szCs><w:lang w:val="en-US" w:eastAsia="zh-CN"></w:lang></w:rPr><w:t>F16 Achievement (f28)</w:t></w:r></w:p><w:p w14:paraId="21F63670"><w:pPr><w:bidi w:val="0"></w:bidi><w:rPr><w:rFonts w:hint="default"></w:rFonts><w:sz w:val="16"></w:sz><w:szCs w:val="20"></w:szCs><w:lang w:val="en-US" w:eastAsia="zh-CN"></w:lang></w:rPr></w:pPr><w:r><w:rPr><w:rFonts w:hint="default"></w:rFonts><w:sz w:val="16"></w:sz><w:szCs w:val="20"></w:szCs><w:lang w:val="en-US" w:eastAsia="zh-CN"></w:lang></w:rPr><w:t>F17 Personalized Products (f52, f53)</w:t></w:r></w:p><w:p w14:paraId="64672E4F"><w:pPr><w:bidi w:val="0"></w:bidi><w:rPr><w:rFonts w:hint="default"></w:rFonts><w:sz w:val="16"></w:sz><w:szCs w:val="20"></w:szCs><w:lang w:val="en-US" w:eastAsia="zh-CN"></w:lang></w:rPr></w:pPr><w:r><w:rPr><w:rFonts w:hint="default"></w:rFonts><w:sz w:val="16"></w:sz><w:szCs w:val="20"></w:szCs><w:lang w:val="en-US" w:eastAsia="zh-CN"></w:lang></w:rPr><w:t>F18 User Experience Focus (f12, f46)</w:t></w:r><w:r><w:rPr><w:rFonts w:hint="eastAsia"></w:rFonts><w:sz w:val="16"></w:sz><w:szCs w:val="20"></w:szCs><w:lang w:val="en-US" w:eastAsia="zh-CN"></w:lang></w:rPr><w:t></w:t></w:r><w:r><w:rPr><w:rFonts w:hint="default"></w:rFonts><w:sz w:val="16"></w:sz><w:szCs w:val="20"></w:szCs><w:lang w:val="en-US" w:eastAsia="zh-CN"></w:lang></w:rPr><w:t></w:t></w:r></w:p><w:p w14:paraId="123D604D"><w:pPr><w:bidi w:val="0"></w:bidi><w:rPr><w:rFonts w:hint="default"></w:rFonts><w:sz w:val="16"></w:sz><w:szCs w:val="20"></w:szCs><w:lang w:val="en-US" w:eastAsia="zh-CN"></w:lang></w:rPr></w:pPr></w:p></w:tc><w:tc><w:tcPr><w:tcW w:w="1755" w:type="dxa"></w:tcW><w:tcBorders><w:top w:val="nil"></w:top><w:bottom w:val="nil"></w:bottom></w:tcBorders><w:noWrap w:val="0"></w:noWrap><w:vAlign w:val="center"></w:vAlign></w:tcPr><w:p w14:paraId="1D05283E"><w:pPr><w:bidi w:val="0"></w:bidi><w:rPr><w:rFonts w:hint="default"></w:rFonts><w:sz w:val="16"></w:sz><w:szCs w:val="20"></w:szCs><w:lang w:val="en-US" w:eastAsia="zh-CN"></w:lang></w:rPr></w:pPr><w:r><w:rPr><w:rFonts w:hint="default"></w:rFonts><w:sz w:val="16"></w:sz><w:szCs w:val="20"></w:szCs><w:lang w:val="en-US" w:eastAsia="zh-CN"></w:lang></w:rPr><w:t>f1 national policy support</w:t></w:r></w:p><w:p w14:paraId="32861D0A"><w:pPr><w:bidi w:val="0"></w:bidi><w:rPr><w:rFonts w:hint="default"></w:rFonts><w:sz w:val="16"></w:sz><w:szCs w:val="20"></w:szCs><w:lang w:val="en-US" w:eastAsia="zh-CN"></w:lang></w:rPr></w:pPr><w:r><w:rPr><w:rFonts w:hint="default"></w:rFonts><w:sz w:val="16"></w:sz><w:szCs w:val="20"></w:szCs><w:lang w:val="en-US" w:eastAsia="zh-CN"></w:lang></w:rPr><w:t>f2 attribute of international cultural exchange</w:t></w:r></w:p><w:p w14:paraId="5CB135A2"><w:pPr><w:bidi w:val="0"></w:bidi><w:rPr><w:rFonts w:hint="default"></w:rFonts><w:sz w:val="16"></w:sz><w:szCs w:val="20"></w:szCs><w:lang w:val="en-US" w:eastAsia="zh-CN"></w:lang></w:rPr></w:pPr><w:r><w:rPr><w:rFonts w:hint="default"></w:rFonts><w:sz w:val="16"></w:sz><w:szCs w:val="20"></w:szCs><w:lang w:val="en-US" w:eastAsia="zh-CN"></w:lang></w:rPr><w:t>f3 Regional Traditional Culture Characteristics</w:t></w:r></w:p><w:p w14:paraId="5E924AF1"><w:pPr><w:bidi w:val="0"></w:bidi><w:rPr><w:rFonts w:hint="default"></w:rFonts><w:sz w:val="16"></w:sz><w:szCs w:val="20"></w:szCs><w:lang w:val="en-US" w:eastAsia="zh-CN"></w:lang></w:rPr></w:pPr><w:r><w:rPr><w:rFonts w:hint="default"></w:rFonts><w:sz w:val="16"></w:sz><w:szCs w:val="20"></w:szCs><w:lang w:val="en-US" w:eastAsia="zh-CN"></w:lang></w:rPr><w:t>The Regionalism of the Folk Culture in F4</w:t></w:r></w:p><w:p w14:paraId="37C52A40"><w:pPr><w:bidi w:val="0"></w:bidi><w:rPr><w:rFonts w:hint="default"></w:rFonts><w:sz w:val="16"></w:sz><w:szCs w:val="20"></w:szCs><w:lang w:val="en-US" w:eastAsia="zh-CN"></w:lang></w:rPr></w:pPr><w:r><w:rPr><w:rFonts w:hint="default"></w:rFonts><w:sz w:val="16"></w:sz><w:szCs w:val="20"></w:szCs><w:lang w:val="en-US" w:eastAsia="zh-CN"></w:lang></w:rPr><w:t>f5 Emotional resonance and a sense of belonging</w:t></w:r></w:p><w:p w14:paraId="579A1EB4"><w:pPr><w:bidi w:val="0"></w:bidi><w:rPr><w:rFonts w:hint="default"></w:rFonts><w:sz w:val="16"></w:sz><w:szCs w:val="20"></w:szCs><w:lang w:val="en-US" w:eastAsia="zh-CN"></w:lang></w:rPr></w:pPr><w:r><w:rPr><w:rFonts w:hint="default"></w:rFonts><w:sz w:val="16"></w:sz><w:szCs w:val="20"></w:szCs><w:lang w:val="en-US" w:eastAsia="zh-CN"></w:lang></w:rPr><w:t>f6 Product is a Cultural Carrier</w:t></w:r></w:p><w:p w14:paraId="40D75056"><w:pPr><w:bidi w:val="0"></w:bidi><w:rPr><w:rFonts w:hint="default"></w:rFonts><w:sz w:val="16"></w:sz><w:szCs w:val="20"></w:szCs><w:lang w:val="en-US" w:eastAsia="zh-CN"></w:lang></w:rPr></w:pPr><w:r><w:rPr><w:rFonts w:hint="default"></w:rFonts><w:sz w:val="16"></w:sz><w:szCs w:val="20"></w:szCs><w:lang w:val="en-US" w:eastAsia="zh-CN"></w:lang></w:rPr><w:t>f7 Promote social interaction</w:t></w:r></w:p><w:p w14:paraId="145E6210"><w:pPr><w:bidi w:val="0"></w:bidi><w:rPr><w:rFonts w:hint="default"></w:rFonts><w:sz w:val="16"></w:sz><w:szCs w:val="20"></w:szCs><w:lang w:val="en-US" w:eastAsia="zh-CN"></w:lang></w:rPr></w:pPr><w:r><w:rPr><w:rFonts w:hint="default"></w:rFonts><w:sz w:val="16"></w:sz><w:szCs w:val="20"></w:szCs><w:lang w:val="en-US" w:eastAsia="zh-CN"></w:lang></w:rPr><w:t>f8 Technology Integration to Increase Vitality</w:t></w:r></w:p><w:p w14:paraId="4EDAD486"><w:pPr><w:bidi w:val="0"></w:bidi><w:rPr><w:rFonts w:hint="default"></w:rFonts><w:sz w:val="16"></w:sz><w:szCs w:val="20"></w:szCs><w:lang w:val="en-US" w:eastAsia="zh-CN"></w:lang></w:rPr></w:pPr><w:r><w:rPr><w:rFonts w:hint="default"></w:rFonts><w:sz w:val="16"></w:sz><w:szCs w:val="20"></w:szCs><w:lang w:val="en-US" w:eastAsia="zh-CN"></w:lang></w:rPr><w:t>The Color Concept of f9 Expresses Cultural Connotation</w:t></w:r></w:p><w:p w14:paraId="061F6FF8"><w:pPr><w:bidi w:val="0"></w:bidi><w:rPr><w:rFonts w:hint="default"></w:rFonts><w:sz w:val="16"></w:sz><w:szCs w:val="20"></w:szCs><w:lang w:val="en-US" w:eastAsia="zh-CN"></w:lang></w:rPr></w:pPr><w:r><w:rPr><w:rFonts w:hint="default"></w:rFonts><w:sz w:val="16"></w:sz><w:szCs w:val="20"></w:szCs><w:lang w:val="en-US" w:eastAsia="zh-CN"></w:lang></w:rPr><w:t>f10 Innovative and Creative Works</w:t></w:r></w:p><w:p w14:paraId="12EFE546"><w:pPr><w:bidi w:val="0"></w:bidi><w:rPr><w:rFonts w:hint="default"></w:rFonts><w:sz w:val="16"></w:sz><w:szCs w:val="20"></w:szCs><w:lang w:val="en-US" w:eastAsia="zh-CN"></w:lang></w:rPr></w:pPr><w:r><w:rPr><w:rFonts w:hint="default"></w:rFonts><w:sz w:val="16"></w:sz><w:szCs w:val="20"></w:szCs><w:lang w:val="en-US" w:eastAsia="zh-CN"></w:lang></w:rPr><w:t>f11 Environmental Protection Material Packaging Production</w:t></w:r></w:p><w:p w14:paraId="70E52628"><w:pPr><w:bidi w:val="0"></w:bidi><w:rPr><w:rFonts w:hint="default"></w:rFonts><w:sz w:val="16"></w:sz><w:szCs w:val="20"></w:szCs><w:lang w:val="en-US" w:eastAsia="zh-CN"></w:lang></w:rPr></w:pPr><w:r><w:rPr><w:rFonts w:hint="default"></w:rFonts><w:sz w:val="16"></w:sz><w:szCs w:val="20"></w:szCs><w:lang w:val="en-US" w:eastAsia="zh-CN"></w:lang></w:rPr><w:t>The f12 is more refined in its production.</w:t></w:r></w:p><w:p w14:paraId="372EFE5F"><w:pPr><w:bidi w:val="0"></w:bidi><w:rPr><w:rFonts w:hint="default"></w:rFonts><w:sz w:val="16"></w:sz><w:szCs w:val="20"></w:szCs><w:lang w:val="en-US" w:eastAsia="zh-CN"></w:lang></w:rPr></w:pPr><w:r><w:rPr><w:rFonts w:hint="default"></w:rFonts><w:sz w:val="16"></w:sz><w:szCs w:val="20"></w:szCs><w:lang w:val="en-US" w:eastAsia="zh-CN"></w:lang></w:rPr><w:t>F13: Super Materials for Easy Explanation</w:t></w:r></w:p><w:p w14:paraId="66433824"><w:pPr><w:bidi w:val="0"></w:bidi><w:rPr><w:rFonts w:hint="default"></w:rFonts><w:sz w:val="16"></w:sz><w:szCs w:val="20"></w:szCs><w:lang w:val="en-US" w:eastAsia="zh-CN"></w:lang></w:rPr></w:pPr><w:r><w:rPr><w:rFonts w:hint="default"></w:rFonts><w:sz w:val="16"></w:sz><w:szCs w:val="20"></w:szCs><w:lang w:val="en-US" w:eastAsia="zh-CN"></w:lang></w:rPr><w:t>f14 Innovative products are the core competitiveness</w:t></w:r></w:p><w:p w14:paraId="657B9CA6"><w:pPr><w:bidi w:val="0"></w:bidi><w:rPr><w:rFonts w:hint="default"></w:rFonts><w:sz w:val="16"></w:sz><w:szCs w:val="20"></w:szCs><w:lang w:val="en-US" w:eastAsia="zh-CN"></w:lang></w:rPr></w:pPr><w:r><w:rPr><w:rFonts w:hint="default"></w:rFonts><w:sz w:val="16"></w:sz><w:szCs w:val="20"></w:szCs><w:lang w:val="en-US" w:eastAsia="zh-CN"></w:lang></w:rPr><w:t>F15: Deconstructing and Reconstructing Intangible Cultural Heritage to Innovate Trendy Products</w:t></w:r></w:p><w:p w14:paraId="54F6AE9C"><w:pPr><w:bidi w:val="0"></w:bidi><w:rPr><w:rFonts w:hint="default"></w:rFonts><w:sz w:val="16"></w:sz><w:szCs w:val="20"></w:szCs><w:lang w:val="en-US" w:eastAsia="zh-CN"></w:lang></w:rPr></w:pPr><w:r><w:rPr><w:rFonts w:hint="default"></w:rFonts><w:sz w:val="16"></w:sz><w:szCs w:val="20"></w:szCs><w:lang w:val="en-US" w:eastAsia="zh-CN"></w:lang></w:rPr><w:t>The Modern Expression of Traditional Culture</w:t></w:r></w:p><w:p w14:paraId="58268EAA"><w:pPr><w:bidi w:val="0"></w:bidi><w:rPr><w:rFonts w:hint="default"></w:rFonts><w:sz w:val="16"></w:sz><w:szCs w:val="20"></w:szCs><w:lang w:val="en-US" w:eastAsia="zh-CN"></w:lang></w:rPr></w:pPr><w:r><w:rPr><w:rFonts w:hint="default"></w:rFonts><w:sz w:val="16"></w:sz><w:szCs w:val="20"></w:szCs><w:lang w:val="en-US" w:eastAsia="zh-CN"></w:lang></w:rPr><w:t>f17 Handicrafts Value</w:t></w:r></w:p><w:p w14:paraId="16CDAEC6"><w:pPr><w:bidi w:val="0"></w:bidi><w:rPr><w:rFonts w:hint="default"></w:rFonts><w:sz w:val="16"></w:sz><w:szCs w:val="20"></w:szCs><w:lang w:val="en-US" w:eastAsia="zh-CN"></w:lang></w:rPr></w:pPr><w:r><w:rPr><w:rFonts w:hint="default"></w:rFonts><w:sz w:val="16"></w:sz><w:szCs w:val="20"></w:szCs><w:lang w:val="en-US" w:eastAsia="zh-CN"></w:lang></w:rPr><w:t>F18 Sustainable Development Concept</w:t></w:r></w:p><w:p w14:paraId="25725418"><w:pPr><w:bidi w:val="0"></w:bidi><w:rPr><w:rFonts w:hint="default"></w:rFonts><w:sz w:val="16"></w:sz><w:szCs w:val="20"></w:szCs><w:lang w:val="en-US" w:eastAsia="zh-CN"></w:lang></w:rPr></w:pPr></w:p></w:tc><w:tc><w:tcPr><w:tcW w:w="3875" w:type="dxa"></w:tcW><w:tcBorders><w:top w:val="nil"></w:top><w:bottom w:val="nil"></w:bottom></w:tcBorders><w:noWrap w:val="0"></w:noWrap><w:vAlign w:val="center"></w:vAlign></w:tcPr><w:p w14:paraId="6F3DCB63"><w:pPr><w:bidi w:val="0"></w:bidi><w:rPr><w:rFonts w:hint="default"></w:rFonts><w:sz w:val="16"></w:sz><w:szCs w:val="20"></w:szCs><w:lang w:val="en-US" w:eastAsia="zh-CN"></w:lang></w:rPr></w:pPr><w:r><w:rPr><w:rFonts w:hint="default"></w:rFonts><w:sz w:val="16"></w:sz><w:szCs w:val="20"></w:szCs><w:lang w:val="en-US" w:eastAsia="zh-CN"></w:lang></w:rPr><w:t>With the strong support of social environment and national policy, Chinas cultural industry has gradually risen and presented a vigorous development trend, and cultural creative products have been increasingly concerned by the public and entered into the public life.</w:t></w:r></w:p><w:p w14:paraId="3A3A9106"><w:pPr><w:bidi w:val="0"></w:bidi><w:rPr><w:rFonts w:hint="default"></w:rFonts><w:sz w:val="16"></w:sz><w:szCs w:val="20"></w:szCs><w:lang w:val="en-US" w:eastAsia="zh-CN"></w:lang></w:rPr></w:pPr><w:r><w:rPr><w:rFonts w:hint="default"></w:rFonts><w:sz w:val="16"></w:sz><w:szCs w:val="20"></w:szCs><w:lang w:val="en-US" w:eastAsia="zh-CN"></w:lang></w:rPr><w:t>Chinas cultural IPs are accelerating their global expansion, while localized adaptations of international IPs (such as Disneys China-themed series) are fostering two-way cultural exchanges (f2).</w:t></w:r></w:p><w:p w14:paraId="05064150"><w:pPr><w:bidi w:val="0"></w:bidi><w:rPr><w:rFonts w:hint="default"></w:rFonts><w:sz w:val="16"></w:sz><w:szCs w:val="20"></w:szCs><w:lang w:val="en-US" w:eastAsia="zh-CN"></w:lang></w:rPr></w:pPr><w:r><w:rPr><w:rFonts w:hint="default"></w:rFonts><w:sz w:val="16"></w:sz><w:szCs w:val="20"></w:szCs><w:lang w:val="en-US" w:eastAsia="zh-CN"></w:lang></w:rPr><w:t>While fulfilling peoples spiritual needs, it showcases regional traditions (f3)</w:t></w:r></w:p><w:p w14:paraId="68252E3B"><w:pPr><w:bidi w:val="0"></w:bidi><w:rPr><w:rFonts w:hint="default"></w:rFonts><w:sz w:val="16"></w:sz><w:szCs w:val="20"></w:szCs><w:lang w:val="en-US" w:eastAsia="zh-CN"></w:lang></w:rPr></w:pPr><w:r><w:rPr><w:rFonts w:hint="default"></w:rFonts><w:sz w:val="16"></w:sz><w:szCs w:val="20"></w:szCs><w:lang w:val="en-US" w:eastAsia="zh-CN"></w:lang></w:rPr><w:t>Differences in various cultural aspects such as folklore and architectural landscapes (f4)</w:t></w:r></w:p><w:p w14:paraId="6E868F9F"><w:pPr><w:bidi w:val="0"></w:bidi><w:rPr><w:rFonts w:hint="default"></w:rFonts><w:sz w:val="16"></w:sz><w:szCs w:val="20"></w:szCs><w:lang w:val="en-US" w:eastAsia="zh-CN"></w:lang></w:rPr></w:pPr><w:r><w:rPr><w:rFonts w:hint="default"></w:rFonts><w:sz w:val="16"></w:sz><w:szCs w:val="20"></w:szCs><w:lang w:val="en-US" w:eastAsia="zh-CN"></w:lang></w:rPr><w:t>The commemorative nature of cultural and creative products evokes emotional experiences and memories in users, fostering emotional resonance and a sense of belonging (f5).</w:t></w:r></w:p><w:p w14:paraId="0E12FE78"><w:pPr><w:bidi w:val="0"></w:bidi><w:rPr><w:rFonts w:hint="default"></w:rFonts><w:sz w:val="16"></w:sz><w:szCs w:val="20"></w:szCs><w:lang w:val="en-US" w:eastAsia="zh-CN"></w:lang></w:rPr></w:pPr><w:r><w:rPr><w:rFonts w:hint="default"></w:rFonts><w:sz w:val="16"></w:sz><w:szCs w:val="20"></w:szCs><w:lang w:val="en-US" w:eastAsia="zh-CN"></w:lang></w:rPr><w:t>Unlike ordinary commodities, cultural and creative products require emotional connection with consumers. Through narrative-driven design, they become vehicles for cultural storytelling (f6).</w:t></w:r></w:p><w:p w14:paraId="41775FE8"><w:pPr><w:bidi w:val="0"></w:bidi><w:rPr><w:rFonts w:hint="default"></w:rFonts><w:sz w:val="16"></w:sz><w:szCs w:val="20"></w:szCs><w:lang w:val="en-US" w:eastAsia="zh-CN"></w:lang></w:rPr></w:pPr><w:r><w:rPr><w:rFonts w:hint="default"></w:rFonts><w:sz w:val="16"></w:sz><w:szCs w:val="20"></w:szCs><w:lang w:val="en-US" w:eastAsia="zh-CN"></w:lang></w:rPr><w:t>The exchange of cultural and creative gifts can bridge interpersonal gaps, strengthen emotional bonds, and serve as a vital social connector. (f7)</w:t></w:r></w:p><w:p w14:paraId="06673EA2"><w:pPr><w:bidi w:val="0"></w:bidi><w:rPr><w:rFonts w:hint="default"></w:rFonts><w:sz w:val="16"></w:sz><w:szCs w:val="20"></w:szCs><w:lang w:val="en-US" w:eastAsia="zh-CN"></w:lang></w:rPr></w:pPr><w:r><w:rPr><w:rFonts w:hint="default"></w:rFonts><w:sz w:val="16"></w:sz><w:szCs w:val="20"></w:szCs><w:lang w:val="en-US" w:eastAsia="zh-CN"></w:lang></w:rPr><w:t>The fusion of AR/VR technology with physical cultural and creative products will create a groundbreaking experience (f8)</w:t></w:r></w:p><w:p w14:paraId="06CE40F1"><w:pPr><w:bidi w:val="0"></w:bidi><w:rPr><w:rFonts w:hint="default"></w:rFonts><w:sz w:val="16"></w:sz><w:szCs w:val="20"></w:szCs><w:lang w:val="en-US" w:eastAsia="zh-CN"></w:lang></w:rPr></w:pPr><w:r><w:rPr><w:rFonts w:hint="default"></w:rFonts><w:sz w:val="16"></w:sz><w:szCs w:val="20"></w:szCs><w:lang w:val="en-US" w:eastAsia="zh-CN"></w:lang></w:rPr><w:t>100% of college students are attracted by the cultural connotations behind the Forbidden City. These products, which integrate traditional cultural elements with modern design concepts, resonate with the emotional expressions of college students and convey the essence of China (f9).</w:t></w:r></w:p><w:p w14:paraId="094A0ECD"><w:pPr><w:bidi w:val="0"></w:bidi><w:rPr><w:rFonts w:hint="default"></w:rFonts><w:sz w:val="16"></w:sz><w:szCs w:val="20"></w:szCs><w:lang w:val="en-US" w:eastAsia="zh-CN"></w:lang></w:rPr></w:pPr><w:r><w:rPr><w:rFonts w:hint="default"></w:rFonts><w:sz w:val="16"></w:sz><w:szCs w:val="20"></w:szCs><w:lang w:val="en-US" w:eastAsia="zh-CN"></w:lang></w:rPr><w:t>While pursuing innovation, we must also adhere to a people-first principle, integrate a long-term design vision, and emphasize human-centered design concepts and user experience (f10).</w:t></w:r></w:p><w:p w14:paraId="793242E7"><w:pPr><w:bidi w:val="0"></w:bidi><w:rPr><w:rFonts w:hint="default"></w:rFonts><w:sz w:val="16"></w:sz><w:szCs w:val="20"></w:szCs><w:lang w:val="en-US" w:eastAsia="zh-CN"></w:lang></w:rPr></w:pPr><w:r><w:rPr><w:rFonts w:hint="default"></w:rFonts><w:sz w:val="16"></w:sz><w:szCs w:val="20"></w:szCs><w:lang w:val="en-US" w:eastAsia="zh-CN"></w:lang></w:rPr><w:t>In product design and manufacturing, emphasis should be placed on reducing resource consumption by adopting eco-friendly and efficient processes to minimize ecological impact, thereby implementing the principles of sustainable development (f11).</w:t></w:r></w:p><w:p w14:paraId="491D6A34"><w:pPr><w:bidi w:val="0"></w:bidi><w:rPr><w:rFonts w:hint="default"></w:rFonts><w:sz w:val="16"></w:sz><w:szCs w:val="20"></w:szCs><w:lang w:val="en-US" w:eastAsia="zh-CN"></w:lang></w:rPr></w:pPr><w:r><w:rPr><w:rFonts w:hint="default"></w:rFonts><w:sz w:val="16"></w:sz><w:szCs w:val="20"></w:szCs><w:lang w:val="en-US" w:eastAsia="zh-CN"></w:lang></w:rPr><w:t>Craftsmen pay meticulous attention to every detail to ensure the products are exquisitely crafted and of superior quality (f12)</w:t></w:r></w:p><w:p w14:paraId="4DB2096E"><w:pPr><w:bidi w:val="0"></w:bidi><w:rPr><w:rFonts w:hint="default"></w:rFonts><w:sz w:val="16"></w:sz><w:szCs w:val="20"></w:szCs><w:lang w:val="en-US" w:eastAsia="zh-CN"></w:lang></w:rPr></w:pPr><w:r><w:rPr><w:rFonts w:hint="default"></w:rFonts><w:sz w:val="16"></w:sz><w:szCs w:val="20"></w:szCs><w:lang w:val="en-US" w:eastAsia="zh-CN"></w:lang></w:rPr><w:t>The innovative composite material not only facilitates cultural interpretation but also elevates the products aesthetic appeal (f13).</w:t></w:r></w:p><w:p w14:paraId="15B79747"><w:pPr><w:bidi w:val="0"></w:bidi><w:rPr><w:rFonts w:hint="default"></w:rFonts><w:sz w:val="16"></w:sz><w:szCs w:val="20"></w:szCs><w:lang w:val="en-US" w:eastAsia="zh-CN"></w:lang></w:rPr></w:pPr><w:r><w:rPr><w:rFonts w:hint="default"></w:rFonts><w:sz w:val="16"></w:sz><w:szCs w:val="20"></w:szCs><w:lang w:val="en-US" w:eastAsia="zh-CN"></w:lang></w:rPr><w:t>Innovative design is the key factor for cultural and creative products to stand out in the market competition (f14).</w:t></w:r></w:p><w:p w14:paraId="543BE210"><w:pPr><w:bidi w:val="0"></w:bidi><w:rPr><w:rFonts w:hint="default"></w:rFonts><w:sz w:val="16"></w:sz><w:szCs w:val="20"></w:szCs><w:lang w:val="en-US" w:eastAsia="zh-CN"></w:lang></w:rPr></w:pPr><w:r><w:rPr><w:rFonts w:hint="default"></w:rFonts><w:sz w:val="16"></w:sz><w:szCs w:val="20"></w:szCs><w:lang w:val="en-US" w:eastAsia="zh-CN"></w:lang></w:rPr><w:t>By deconstructing and reconstructing intangible cultural heritage, we create trendy products (f15) that align with modern aesthetics.</w:t></w:r></w:p><w:p w14:paraId="25DE3A9C"><w:pPr><w:bidi w:val="0"></w:bidi><w:rPr><w:rFonts w:hint="default"></w:rFonts><w:sz w:val="16"></w:sz><w:szCs w:val="20"></w:szCs><w:lang w:val="en-US" w:eastAsia="zh-CN"></w:lang></w:rPr></w:pPr><w:r><w:rPr><w:rFonts w:hint="default"></w:rFonts><w:sz w:val="16"></w:sz><w:szCs w:val="20"></w:szCs><w:lang w:val="en-US" w:eastAsia="zh-CN"></w:lang></w:rPr><w:t>Reinterpret and express traditional cultural elements through modern design language (f16)</w:t></w:r></w:p><w:p w14:paraId="33FE2E81"><w:pPr><w:bidi w:val="0"></w:bidi><w:rPr><w:rFonts w:hint="default"></w:rFonts><w:sz w:val="16"></w:sz><w:szCs w:val="20"></w:szCs><w:lang w:val="en-US" w:eastAsia="zh-CN"></w:lang></w:rPr></w:pPr><w:r><w:rPr><w:rFonts w:hint="default"></w:rFonts><w:sz w:val="16"></w:sz><w:szCs w:val="20"></w:szCs><w:lang w:val="en-US" w:eastAsia="zh-CN"></w:lang></w:rPr><w:t>Traditional handicrafts embody unique cultural values and artistic charm (f17).</w:t></w:r></w:p><w:p w14:paraId="6ADB6938"><w:pPr><w:bidi w:val="0"></w:bidi><w:rPr><w:rFonts w:hint="default"></w:rFonts><w:sz w:val="16"></w:sz><w:szCs w:val="20"></w:szCs><w:lang w:val="en-US" w:eastAsia="zh-CN"></w:lang></w:rPr></w:pPr><w:r><w:rPr><w:rFonts w:hint="default"></w:rFonts><w:sz w:val="16"></w:sz><w:szCs w:val="20"></w:szCs><w:lang w:val="en-US" w:eastAsia="zh-CN"></w:lang></w:rPr><w:t>During the design process, full consideration was given to environmental protection and sustainable resource utilization (f18).</w:t></w:r></w:p></w:tc></w:tr><w:tr w14:paraId="4FDE1AEE"><w:tblPrEx><w:tblBorders><w:top w:val="single" w:color="008000" w:sz="12" w:space="0"></w:top><w:left w:val="none" w:color="auto" w:sz="0" w:space="0"></w:left><w:bottom w:val="single" w:color="auto" w:sz="18" w:space="0"></w:bottom><w:right w:val="none" w:color="auto" w:sz="0" w:space="0"></w:right><w:insideH w:val="none" w:color="auto" w:sz="0" w:space="0"></w:insideH><w:insideV w:val="none" w:color="auto" w:sz="0" w:space="0"></w:insideV></w:tblBorders></w:tblPrEx><w:trPr><w:trHeight w:val="13517" w:hRule="atLeast"></w:trHeight><w:jc w:val="center"></w:jc></w:trPr><w:tc><w:tcPr><w:tcW w:w="1571" w:type="dxa"></w:tcW><w:tcBorders><w:top w:val="nil"></w:top><w:bottom w:val="nil"></w:bottom></w:tcBorders><w:shd w:val="clear" w:color="auto" w:fill="auto"></w:shd><w:noWrap w:val="0"></w:noWrap><w:vAlign w:val="center"></w:vAlign></w:tcPr><w:p w14:paraId="3FF2F480"><w:pPr><w:bidi w:val="0"></w:bidi><w:rPr><w:rFonts w:hint="default"></w:rFonts><w:sz w:val="16"></w:sz><w:szCs w:val="20"></w:szCs><w:lang w:val="en-US" w:eastAsia="zh-CN"></w:lang></w:rPr></w:pPr></w:p></w:tc><w:tc><w:tcPr><w:tcW w:w="2034" w:type="dxa"></w:tcW><w:tcBorders><w:top w:val="nil"></w:top><w:bottom w:val="nil"></w:bottom></w:tcBorders><w:shd w:val="clear" w:color="auto" w:fill="auto"></w:shd><w:noWrap w:val="0"></w:noWrap><w:vAlign w:val="center"></w:vAlign></w:tcPr><w:p w14:paraId="6BE59376"><w:pPr><w:bidi w:val="0"></w:bidi><w:rPr><w:rFonts w:hint="default"></w:rFonts><w:sz w:val="16"></w:sz><w:szCs w:val="20"></w:szCs><w:lang w:val="en-US" w:eastAsia="zh-CN"></w:lang></w:rPr></w:pPr><w:r><w:rPr><w:rFonts w:hint="default"></w:rFonts><w:sz w:val="16"></w:sz><w:szCs w:val="20"></w:szCs><w:lang w:val="en-US" w:eastAsia="zh-CN"></w:lang></w:rPr><w:t>F19 Cultural Connotation and Attraction (f54, f51)</w:t></w:r></w:p><w:p w14:paraId="529CC65C"><w:pPr><w:bidi w:val="0"></w:bidi><w:rPr><w:rFonts w:hint="default"></w:rFonts><w:sz w:val="16"></w:sz><w:szCs w:val="20"></w:szCs><w:lang w:val="en-US" w:eastAsia="zh-CN"></w:lang></w:rPr></w:pPr><w:r><w:rPr><w:rFonts w:hint="default"></w:rFonts><w:sz w:val="16"></w:sz><w:szCs w:val="20"></w:szCs><w:lang w:val="en-US" w:eastAsia="zh-CN"></w:lang></w:rPr><w:t>F20 International Cultural Exchange (f2, f30)</w:t></w:r></w:p><w:p w14:paraId="41675989"><w:pPr><w:bidi w:val="0"></w:bidi><w:rPr><w:rFonts w:hint="default"></w:rFonts><w:sz w:val="16"></w:sz><w:szCs w:val="20"></w:szCs><w:lang w:val="en-US" w:eastAsia="zh-CN"></w:lang></w:rPr></w:pPr><w:r><w:rPr><w:rFonts w:hint="default"></w:rFonts><w:sz w:val="16"></w:sz><w:szCs w:val="20"></w:szCs><w:lang w:val="en-US" w:eastAsia="zh-CN"></w:lang></w:rPr><w:t>F21 Aesthetic Colors (f9, f29)</w:t></w:r></w:p><w:p w14:paraId="69B3ECCB"><w:pPr><w:bidi w:val="0"></w:bidi><w:rPr><w:rFonts w:hint="default"></w:rFonts><w:sz w:val="16"></w:sz><w:szCs w:val="20"></w:szCs><w:lang w:val="en-US" w:eastAsia="zh-CN"></w:lang></w:rPr></w:pPr><w:r><w:rPr><w:rFonts w:hint="default"></w:rFonts><w:sz w:val="16"></w:sz><w:szCs w:val="20"></w:szCs><w:lang w:val="en-US" w:eastAsia="zh-CN"></w:lang></w:rPr><w:t>F22: Consumer Value Perception (f43, f27)</w:t></w:r></w:p><w:p w14:paraId="7420701A"><w:pPr><w:bidi w:val="0"></w:bidi><w:rPr><w:rFonts w:hint="default"></w:rFonts><w:sz w:val="16"></w:sz><w:szCs w:val="20"></w:szCs><w:lang w:val="en-US" w:eastAsia="zh-CN"></w:lang></w:rPr></w:pPr><w:r><w:rPr><w:rFonts w:hint="default"></w:rFonts><w:sz w:val="16"></w:sz><w:szCs w:val="20"></w:szCs><w:lang w:val="en-US" w:eastAsia="zh-CN"></w:lang></w:rPr><w:t>F23 User Experience Optimization (f50, f47)</w:t></w:r></w:p><w:p w14:paraId="7C526C55"><w:pPr><w:bidi w:val="0"></w:bidi><w:rPr><w:rFonts w:hint="default"></w:rFonts><w:sz w:val="16"></w:sz><w:szCs w:val="20"></w:szCs><w:lang w:val="en-US" w:eastAsia="zh-CN"></w:lang></w:rPr></w:pPr><w:r><w:rPr><w:rFonts w:hint="default"></w:rFonts><w:sz w:val="16"></w:sz><w:szCs w:val="20"></w:szCs><w:lang w:val="en-US" w:eastAsia="zh-CN"></w:lang></w:rPr><w:t>F24 Cultural Differences Display (f4, f44)</w:t></w:r></w:p><w:p w14:paraId="2010EFF4"><w:pPr><w:bidi w:val="0"></w:bidi><w:rPr><w:rFonts w:hint="default"></w:rFonts><w:sz w:val="16"></w:sz><w:szCs w:val="20"></w:szCs><w:lang w:val="en-US" w:eastAsia="zh-CN"></w:lang></w:rPr></w:pPr><w:r><w:rPr><w:rFonts w:hint="default"></w:rFonts><w:sz w:val="16"></w:sz><w:szCs w:val="20"></w:szCs><w:lang w:val="en-US" w:eastAsia="zh-CN"></w:lang></w:rPr><w:t>F25 Emotional memory trigger (f38)</w:t></w:r></w:p><w:p w14:paraId="204F65A9"><w:pPr><w:bidi w:val="0"></w:bidi><w:rPr><w:rFonts w:hint="default"></w:rFonts><w:sz w:val="16"></w:sz><w:szCs w:val="20"></w:szCs><w:lang w:val="en-US" w:eastAsia="zh-CN"></w:lang></w:rPr></w:pPr><w:r><w:rPr><w:rFonts w:hint="default"></w:rFonts><w:sz w:val="16"></w:sz><w:szCs w:val="20"></w:szCs><w:lang w:val="en-US" w:eastAsia="zh-CN"></w:lang></w:rPr><w:t>F26 Awareness of cultural preservation (f33, f56)</w:t></w:r></w:p><w:p w14:paraId="7D5A5C22"><w:pPr><w:bidi w:val="0"></w:bidi><w:rPr><w:rFonts w:hint="default"></w:rFonts><w:sz w:val="16"></w:sz><w:szCs w:val="20"></w:szCs><w:lang w:val="en-US" w:eastAsia="zh-CN"></w:lang></w:rPr></w:pPr><w:r><w:rPr><w:rFonts w:hint="default"></w:rFonts><w:sz w:val="16"></w:sz><w:szCs w:val="20"></w:szCs><w:lang w:val="en-US" w:eastAsia="zh-CN"></w:lang></w:rPr><w:t>The F27 design concept integrates (F21, F39, F55)</w:t></w:r></w:p><w:p w14:paraId="0934400A"><w:pPr><w:bidi w:val="0"></w:bidi><w:rPr><w:rFonts w:hint="default"></w:rFonts><w:sz w:val="16"></w:sz><w:szCs w:val="20"></w:szCs><w:lang w:val="en-US" w:eastAsia="zh-CN"></w:lang></w:rPr></w:pPr><w:r><w:rPr><w:rFonts w:hint="default"></w:rFonts><w:sz w:val="16"></w:sz><w:szCs w:val="20"></w:szCs><w:lang w:val="en-US" w:eastAsia="zh-CN"></w:lang></w:rPr><w:t>The characteristics of the F28 era are reflected in F45 and F48.</w:t></w:r></w:p><w:p w14:paraId="2FBD50A1"><w:pPr><w:bidi w:val="0"></w:bidi><w:rPr><w:rFonts w:hint="default"></w:rFonts><w:sz w:val="16"></w:sz><w:szCs w:val="20"></w:szCs><w:lang w:val="en-US" w:eastAsia="zh-CN"></w:lang></w:rPr></w:pPr><w:r><w:rPr><w:rFonts w:hint="default"></w:rFonts><w:sz w:val="16"></w:sz><w:szCs w:val="20"></w:szCs><w:lang w:val="en-US" w:eastAsia="zh-CN"></w:lang></w:rPr><w:t>F29 Innovative Technology Applications (f32, f42.f42)</w:t></w:r></w:p><w:p w14:paraId="04A997A6"><w:pPr><w:bidi w:val="0"></w:bidi><w:rPr><w:rFonts w:hint="default"></w:rFonts><w:sz w:val="16"></w:sz><w:szCs w:val="20"></w:szCs><w:lang w:val="en-US" w:eastAsia="zh-CN"></w:lang></w:rPr></w:pPr><w:r><w:rPr><w:rFonts w:hint="default"></w:rFonts><w:sz w:val="16"></w:sz><w:szCs w:val="20"></w:szCs><w:lang w:val="en-US" w:eastAsia="zh-CN"></w:lang></w:rPr><w:t>F30 Traditional Modern Balance (f16, f49)</w:t></w:r></w:p><w:p w14:paraId="46288A1A"><w:pPr><w:bidi w:val="0"></w:bidi><w:rPr><w:rFonts w:hint="default"></w:rFonts><w:sz w:val="16"></w:sz><w:szCs w:val="20"></w:szCs><w:lang w:val="en-US" w:eastAsia="zh-CN"></w:lang></w:rPr></w:pPr><w:r><w:rPr><w:rFonts w:hint="default"></w:rFonts><w:sz w:val="16"></w:sz><w:szCs w:val="20"></w:szCs><w:lang w:val="en-US" w:eastAsia="zh-CN"></w:lang></w:rPr><w:t>F31 Financial Support (f57, f58)</w:t></w:r></w:p><w:p w14:paraId="4DC1C817"><w:pPr><w:bidi w:val="0"></w:bidi><w:rPr><w:rFonts w:hint="default"></w:rFonts><w:sz w:val="16"></w:sz><w:szCs w:val="20"></w:szCs><w:lang w:val="en-US" w:eastAsia="zh-CN"></w:lang></w:rPr></w:pPr><w:r><w:rPr><w:rFonts w:hint="default"></w:rFonts><w:sz w:val="16"></w:sz><w:szCs w:val="20"></w:szCs><w:lang w:val="en-US" w:eastAsia="zh-CN"></w:lang></w:rPr><w:t>F32 Color Emotional Symbol (f59, f64)</w:t></w:r></w:p><w:p w14:paraId="7F134676"><w:pPr><w:bidi w:val="0"></w:bidi><w:rPr><w:rFonts w:hint="default"></w:rFonts><w:sz w:val="16"></w:sz><w:szCs w:val="20"></w:szCs><w:lang w:val="en-US" w:eastAsia="zh-CN"></w:lang></w:rPr></w:pPr><w:r><w:rPr><w:rFonts w:hint="default"></w:rFonts><w:sz w:val="16"></w:sz><w:szCs w:val="20"></w:szCs><w:lang w:val="en-US" w:eastAsia="zh-CN"></w:lang></w:rPr><w:t>Rational utilization of F33 resources (f11, f60)</w:t></w:r></w:p><w:p w14:paraId="762AD012"><w:pPr><w:bidi w:val="0"></w:bidi><w:rPr><w:rFonts w:hint="default"></w:rFonts><w:sz w:val="16"></w:sz><w:szCs w:val="20"></w:szCs><w:lang w:val="en-US" w:eastAsia="zh-CN"></w:lang></w:rPr></w:pPr><w:r><w:rPr><w:rFonts w:hint="default"></w:rFonts><w:sz w:val="16"></w:sz><w:szCs w:val="20"></w:szCs><w:lang w:val="en-US" w:eastAsia="zh-CN"></w:lang></w:rPr><w:t>F34 meets consumer needs (f61)</w:t></w:r></w:p><w:p w14:paraId="5D11FC79"><w:pPr><w:bidi w:val="0"></w:bidi><w:rPr><w:rFonts w:hint="default"></w:rFonts><w:sz w:val="16"></w:sz><w:szCs w:val="20"></w:szCs><w:lang w:val="en-US" w:eastAsia="zh-CN"></w:lang></w:rPr></w:pPr><w:r><w:rPr><w:rFonts w:hint="default"></w:rFonts><w:sz w:val="16"></w:sz><w:szCs w:val="20"></w:szCs><w:lang w:val="en-US" w:eastAsia="zh-CN"></w:lang></w:rPr><w:t>F35 carries cultural connotations (f6, f62)</w:t></w:r></w:p></w:tc><w:tc><w:tcPr><w:tcW w:w="1755" w:type="dxa"></w:tcW><w:tcBorders><w:top w:val="nil"></w:top><w:bottom w:val="nil"></w:bottom></w:tcBorders><w:shd w:val="clear" w:color="auto" w:fill="auto"></w:shd><w:noWrap w:val="0"></w:noWrap><w:vAlign w:val="center"></w:vAlign></w:tcPr><w:p w14:paraId="3B5F30C4"><w:pPr><w:bidi w:val="0"></w:bidi><w:rPr><w:rFonts w:hint="default"></w:rFonts><w:sz w:val="16"></w:sz><w:szCs w:val="20"></w:szCs><w:lang w:val="en-US" w:eastAsia="zh-CN"></w:lang></w:rPr></w:pPr><w:r><w:rPr><w:rFonts w:hint="default"></w:rFonts><w:sz w:val="16"></w:sz><w:szCs w:val="20"></w:szCs><w:lang w:val="en-US" w:eastAsia="zh-CN"></w:lang></w:rPr><w:t>F19 Emotional Design</w:t></w:r></w:p><w:p w14:paraId="24C0F434"><w:pPr><w:bidi w:val="0"></w:bidi><w:rPr><w:rFonts w:hint="default"></w:rFonts><w:sz w:val="16"></w:sz><w:szCs w:val="20"></w:szCs><w:lang w:val="en-US" w:eastAsia="zh-CN"></w:lang></w:rPr></w:pPr><w:r><w:rPr><w:rFonts w:hint="default"></w:rFonts><w:sz w:val="16"></w:sz><w:szCs w:val="20"></w:szCs><w:lang w:val="en-US" w:eastAsia="zh-CN"></w:lang></w:rPr><w:t>f20 Construction of Cultural Identity</w:t></w:r></w:p><w:p w14:paraId="5FE15F62"><w:pPr><w:bidi w:val="0"></w:bidi><w:rPr><w:rFonts w:hint="default"></w:rFonts><w:sz w:val="16"></w:sz><w:szCs w:val="20"></w:szCs><w:lang w:val="en-US" w:eastAsia="zh-CN"></w:lang></w:rPr></w:pPr><w:r><w:rPr><w:rFonts w:hint="default"></w:rFonts><w:sz w:val="16"></w:sz><w:szCs w:val="20"></w:szCs><w:lang w:val="en-US" w:eastAsia="zh-CN"></w:lang></w:rPr><w:t>f21 Modern Design with Traditional Elements</w:t></w:r></w:p><w:p w14:paraId="2C62BE8C"><w:pPr><w:bidi w:val="0"></w:bidi><w:rPr><w:rFonts w:hint="default"></w:rFonts><w:sz w:val="16"></w:sz><w:szCs w:val="20"></w:szCs><w:lang w:val="en-US" w:eastAsia="zh-CN"></w:lang></w:rPr></w:pPr><w:r><w:rPr><w:rFonts w:hint="default"></w:rFonts><w:sz w:val="16"></w:sz><w:szCs w:val="20"></w:szCs><w:lang w:val="en-US" w:eastAsia="zh-CN"></w:lang></w:rPr><w:t>f22 Social Impact</w:t></w:r></w:p><w:p w14:paraId="18838C2F"><w:pPr><w:bidi w:val="0"></w:bidi><w:rPr><w:rFonts w:hint="default"></w:rFonts><w:sz w:val="16"></w:sz><w:szCs w:val="20"></w:szCs><w:lang w:val="en-US" w:eastAsia="zh-CN"></w:lang></w:rPr></w:pPr><w:r><w:rPr><w:rFonts w:hint="default"></w:rFonts><w:sz w:val="16"></w:sz><w:szCs w:val="20"></w:szCs><w:lang w:val="en-US" w:eastAsia="zh-CN"></w:lang></w:rPr><w:t>f23 Cultural Communication Media</w:t></w:r></w:p><w:p w14:paraId="306CF3F3"><w:pPr><w:bidi w:val="0"></w:bidi><w:rPr><w:rFonts w:hint="default"></w:rFonts><w:sz w:val="16"></w:sz><w:szCs w:val="20"></w:szCs><w:lang w:val="en-US" w:eastAsia="zh-CN"></w:lang></w:rPr></w:pPr><w:r><w:rPr><w:rFonts w:hint="default"></w:rFonts><w:sz w:val="16"></w:sz><w:szCs w:val="20"></w:szCs><w:lang w:val="en-US" w:eastAsia="zh-CN"></w:lang></w:rPr><w:t>F24 Technological Innovation</w:t></w:r></w:p><w:p w14:paraId="0BCFF280"><w:pPr><w:bidi w:val="0"></w:bidi><w:rPr><w:rFonts w:hint="default"></w:rFonts><w:sz w:val="16"></w:sz><w:szCs w:val="20"></w:szCs><w:lang w:val="en-US" w:eastAsia="zh-CN"></w:lang></w:rPr></w:pPr><w:r><w:rPr><w:rFonts w:hint="default"></w:rFonts><w:sz w:val="16"></w:sz><w:szCs w:val="20"></w:szCs><w:lang w:val="en-US" w:eastAsia="zh-CN"></w:lang></w:rPr><w:t>f25 Personalized Expression</w:t></w:r></w:p><w:p w14:paraId="4EB68300"><w:pPr><w:bidi w:val="0"></w:bidi><w:rPr><w:rFonts w:hint="default"></w:rFonts><w:sz w:val="16"></w:sz><w:szCs w:val="20"></w:szCs><w:lang w:val="en-US" w:eastAsia="zh-CN"></w:lang></w:rPr></w:pPr><w:r><w:rPr><w:rFonts w:hint="default"></w:rFonts><w:sz w:val="16"></w:sz><w:szCs w:val="20"></w:szCs><w:lang w:val="en-US" w:eastAsia="zh-CN"></w:lang></w:rPr><w:t>F26: Cross-cultural understanding</w:t></w:r></w:p><w:p w14:paraId="511EA570"><w:pPr><w:bidi w:val="0"></w:bidi><w:rPr><w:rFonts w:hint="default"></w:rFonts><w:sz w:val="16"></w:sz><w:szCs w:val="20"></w:szCs><w:lang w:val="en-US" w:eastAsia="zh-CN"></w:lang></w:rPr></w:pPr><w:r><w:rPr><w:rFonts w:hint="default"></w:rFonts><w:sz w:val="16"></w:sz><w:szCs w:val="20"></w:szCs><w:lang w:val="en-US" w:eastAsia="zh-CN"></w:lang></w:rPr><w:t>F27: Enhanced consumer experience</w:t></w:r></w:p><w:p w14:paraId="3EF1A507"><w:pPr><w:bidi w:val="0"></w:bidi><w:rPr><w:rFonts w:hint="default"></w:rFonts><w:sz w:val="16"></w:sz><w:szCs w:val="20"></w:szCs><w:lang w:val="en-US" w:eastAsia="zh-CN"></w:lang></w:rPr></w:pPr><w:r><w:rPr><w:rFonts w:hint="default"></w:rFonts><w:sz w:val="16"></w:sz><w:szCs w:val="20"></w:szCs><w:lang w:val="en-US" w:eastAsia="zh-CN"></w:lang></w:rPr><w:t>f28 Cultural Confidence</w:t></w:r></w:p><w:p w14:paraId="16A575F7"><w:pPr><w:bidi w:val="0"></w:bidi><w:rPr><w:rFonts w:hint="default"></w:rFonts><w:sz w:val="16"></w:sz><w:szCs w:val="20"></w:szCs><w:lang w:val="en-US" w:eastAsia="zh-CN"></w:lang></w:rPr></w:pPr><w:r><w:rPr><w:rFonts w:hint="default"></w:rFonts><w:sz w:val="16"></w:sz><w:szCs w:val="20"></w:szCs><w:lang w:val="en-US" w:eastAsia="zh-CN"></w:lang></w:rPr><w:t>f29 Aesthetics and Art</w:t></w:r></w:p><w:p w14:paraId="36949C30"><w:pPr><w:bidi w:val="0"></w:bidi><w:rPr><w:rFonts w:hint="default"></w:rFonts><w:sz w:val="16"></w:sz><w:szCs w:val="20"></w:szCs><w:lang w:val="en-US" w:eastAsia="zh-CN"></w:lang></w:rPr></w:pPr><w:r><w:rPr><w:rFonts w:hint="default"></w:rFonts><w:sz w:val="16"></w:sz><w:szCs w:val="20"></w:szCs><w:lang w:val="en-US" w:eastAsia="zh-CN"></w:lang></w:rPr><w:t>f30 Social and Cultural Contributions</w:t></w:r></w:p><w:p w14:paraId="64910C0D"><w:pPr><w:bidi w:val="0"></w:bidi><w:rPr><w:rFonts w:hint="default"></w:rFonts><w:sz w:val="16"></w:sz><w:szCs w:val="20"></w:szCs><w:lang w:val="en-US" w:eastAsia="zh-CN"></w:lang></w:rPr></w:pPr><w:r><w:rPr><w:rFonts w:hint="default"></w:rFonts><w:sz w:val="16"></w:sz><w:szCs w:val="20"></w:szCs><w:lang w:val="en-US" w:eastAsia="zh-CN"></w:lang></w:rPr><w:t>f31 China-fashion cultural symbols usage</w:t></w:r></w:p><w:p w14:paraId="16723E4E"><w:pPr><w:bidi w:val="0"></w:bidi><w:rPr><w:rFonts w:hint="default"></w:rFonts><w:sz w:val="16"></w:sz><w:szCs w:val="20"></w:szCs><w:lang w:val="en-US" w:eastAsia="zh-CN"></w:lang></w:rPr></w:pPr><w:r><w:rPr><w:rFonts w:hint="default"></w:rFonts><w:sz w:val="16"></w:sz><w:szCs w:val="20"></w:szCs><w:lang w:val="en-US" w:eastAsia="zh-CN"></w:lang></w:rPr><w:t>f32 Business Model Innovation</w:t></w:r></w:p><w:p w14:paraId="5BF6DE75"><w:pPr><w:bidi w:val="0"></w:bidi><w:rPr><w:rFonts w:hint="default"></w:rFonts><w:sz w:val="16"></w:sz><w:szCs w:val="20"></w:szCs><w:lang w:val="en-US" w:eastAsia="zh-CN"></w:lang></w:rPr></w:pPr><w:r><w:rPr><w:rFonts w:hint="default"></w:rFonts><w:sz w:val="16"></w:sz><w:szCs w:val="20"></w:szCs><w:lang w:val="en-US" w:eastAsia="zh-CN"></w:lang></w:rPr><w:t>f33 Skill inheritance and development</w:t></w:r></w:p><w:p w14:paraId="55DB18D9"><w:pPr><w:bidi w:val="0"></w:bidi><w:rPr><w:rFonts w:hint="default"></w:rFonts><w:sz w:val="16"></w:sz><w:szCs w:val="20"></w:szCs><w:lang w:val="en-US" w:eastAsia="zh-CN"></w:lang></w:rPr></w:pPr><w:r><w:rPr><w:rFonts w:hint="default"></w:rFonts><w:sz w:val="16"></w:sz><w:szCs w:val="20"></w:szCs><w:lang w:val="en-US" w:eastAsia="zh-CN"></w:lang></w:rPr><w:t>f34 identity symbol</w:t></w:r></w:p><w:p w14:paraId="6C68B1F5"><w:pPr><w:bidi w:val="0"></w:bidi><w:rPr><w:rFonts w:hint="default"></w:rFonts><w:sz w:val="16"></w:sz><w:szCs w:val="20"></w:szCs><w:lang w:val="en-US" w:eastAsia="zh-CN"></w:lang></w:rPr></w:pPr><w:r><w:rPr><w:rFonts w:hint="default"></w:rFonts><w:sz w:val="16"></w:sz><w:szCs w:val="20"></w:szCs><w:lang w:val="en-US" w:eastAsia="zh-CN"></w:lang></w:rPr><w:t>The Aesthetic Education Value of F35</w:t></w:r></w:p><w:p w14:paraId="7664B1CE"><w:pPr><w:bidi w:val="0"></w:bidi><w:rPr><w:rFonts w:hint="default"></w:rFonts><w:sz w:val="16"></w:sz><w:szCs w:val="20"></w:szCs><w:lang w:val="en-US" w:eastAsia="zh-CN"></w:lang></w:rPr></w:pPr><w:r><w:rPr><w:rFonts w:hint="default"></w:rFonts><w:sz w:val="16"></w:sz><w:szCs w:val="20"></w:szCs><w:lang w:val="en-US" w:eastAsia="zh-CN"></w:lang></w:rPr><w:t>f36 Target User Segmentation</w:t></w:r></w:p><w:p w14:paraId="57B70342"><w:pPr><w:bidi w:val="0"></w:bidi><w:rPr><w:rFonts w:hint="default"></w:rFonts><w:sz w:val="16"></w:sz><w:szCs w:val="20"></w:szCs><w:lang w:val="en-US" w:eastAsia="zh-CN"></w:lang></w:rPr></w:pPr><w:r><w:rPr><w:rFonts w:hint="default"></w:rFonts><w:sz w:val="16"></w:sz><w:szCs w:val="20"></w:szCs><w:lang w:val="en-US" w:eastAsia="zh-CN"></w:lang></w:rPr><w:t>f37 China-fashion cultural economy</w:t></w:r></w:p><w:p w14:paraId="7B000ECC"><w:pPr><w:bidi w:val="0"></w:bidi><w:rPr><w:rFonts w:hint="default"></w:rFonts><w:sz w:val="16"></w:sz><w:szCs w:val="20"></w:szCs><w:lang w:val="en-US" w:eastAsia="zh-CN"></w:lang></w:rPr></w:pPr><w:r><w:rPr><w:rFonts w:hint="default"></w:rFonts><w:sz w:val="16"></w:sz><w:szCs w:val="20"></w:szCs><w:lang w:val="en-US" w:eastAsia="zh-CN"></w:lang></w:rPr><w:t>f38 Nostalgic Elements Market Competitive Advantage</w:t></w:r></w:p><w:p w14:paraId="254F9DA3"><w:pPr><w:bidi w:val="0"></w:bidi><w:rPr><w:rFonts w:hint="default"></w:rFonts><w:sz w:val="16"></w:sz><w:szCs w:val="20"></w:szCs><w:lang w:val="en-US" w:eastAsia="zh-CN"></w:lang></w:rPr></w:pPr><w:r><w:rPr><w:rFonts w:hint="default"></w:rFonts><w:sz w:val="16"></w:sz><w:szCs w:val="20"></w:szCs><w:lang w:val="en-US" w:eastAsia="zh-CN"></w:lang></w:rPr><w:t>f39 Design Process Management</w:t></w:r></w:p><w:p w14:paraId="355B1024"><w:pPr><w:bidi w:val="0"></w:bidi><w:rPr><w:rFonts w:hint="default"></w:rFonts><w:sz w:val="16"></w:sz><w:szCs w:val="20"></w:szCs><w:lang w:val="en-US" w:eastAsia="zh-CN"></w:lang></w:rPr></w:pPr><w:r><w:rPr><w:rFonts w:hint="default"></w:rFonts><w:sz w:val="16"></w:sz><w:szCs w:val="20"></w:szCs><w:lang w:val="en-US" w:eastAsia="zh-CN"></w:lang></w:rPr><w:t>f40 Cultural Communication Assessment</w:t></w:r></w:p><w:p w14:paraId="7E7193D4"><w:pPr><w:bidi w:val="0"></w:bidi><w:rPr><w:rFonts w:hint="default"></w:rFonts><w:sz w:val="16"></w:sz><w:szCs w:val="20"></w:szCs><w:lang w:val="en-US" w:eastAsia="zh-CN"></w:lang></w:rPr></w:pPr><w:r><w:rPr><w:rFonts w:hint="default"></w:rFonts><w:sz w:val="16"></w:sz><w:szCs w:val="20"></w:szCs><w:lang w:val="en-US" w:eastAsia="zh-CN"></w:lang></w:rPr><w:t>f41 Innovative Evaluation</w:t></w:r></w:p><w:p w14:paraId="2536DF47"><w:pPr><w:bidi w:val="0"></w:bidi><w:rPr><w:rFonts w:hint="default"></w:rFonts><w:sz w:val="16"></w:sz><w:szCs w:val="20"></w:szCs><w:lang w:val="en-US" w:eastAsia="zh-CN"></w:lang></w:rPr></w:pPr><w:r><w:rPr><w:rFonts w:hint="default"></w:rFonts><w:sz w:val="16"></w:sz><w:szCs w:val="20"></w:szCs><w:lang w:val="en-US" w:eastAsia="zh-CN"></w:lang></w:rPr><w:t>Innovative Application of f42 Element</w:t></w:r></w:p><w:p w14:paraId="13BB9D04"><w:pPr><w:bidi w:val="0"></w:bidi><w:rPr><w:rFonts w:hint="default"></w:rFonts><w:sz w:val="16"></w:sz><w:szCs w:val="20"></w:szCs><w:lang w:val="en-US" w:eastAsia="zh-CN"></w:lang></w:rPr></w:pPr><w:r><w:rPr><w:rFonts w:hint="default"></w:rFonts><w:sz w:val="16"></w:sz><w:szCs w:val="20"></w:szCs><w:lang w:val="en-US" w:eastAsia="zh-CN"></w:lang></w:rPr><w:t>f43 Consumer Behavior</w:t></w:r></w:p><w:p w14:paraId="2306BAC1"><w:pPr><w:bidi w:val="0"></w:bidi><w:rPr><w:rFonts w:hint="default"></w:rFonts><w:sz w:val="16"></w:sz><w:szCs w:val="20"></w:szCs><w:lang w:val="en-US" w:eastAsia="zh-CN"></w:lang></w:rPr></w:pPr><w:r><w:rPr><w:rFonts w:hint="default"></w:rFonts><w:sz w:val="16"></w:sz><w:szCs w:val="20"></w:szCs><w:lang w:val="en-US" w:eastAsia="zh-CN"></w:lang></w:rPr><w:t>f44 Customary Differences</w:t></w:r></w:p></w:tc><w:tc><w:tcPr><w:tcW w:w="3875" w:type="dxa"></w:tcW><w:tcBorders><w:top w:val="nil"></w:top><w:bottom w:val="nil"></w:bottom></w:tcBorders><w:shd w:val="clear" w:color="auto" w:fill="auto"></w:shd><w:noWrap w:val="0"></w:noWrap><w:vAlign w:val="center"></w:vAlign></w:tcPr><w:p w14:paraId="729AC60F"><w:pPr><w:bidi w:val="0"></w:bidi><w:rPr><w:rFonts w:hint="default"></w:rFonts><w:sz w:val="16"></w:sz><w:szCs w:val="20"></w:szCs><w:lang w:val="en-US" w:eastAsia="zh-CN"></w:lang></w:rPr></w:pPr><w:r><w:rPr><w:rFonts w:hint="default"></w:rFonts><w:sz w:val="16"></w:sz><w:szCs w:val="20"></w:szCs><w:lang w:val="en-US" w:eastAsia="zh-CN"></w:lang></w:rPr><w:t>Focus on the emotional expression of products to make the design more humanistic (f19)</w:t></w:r></w:p><w:p w14:paraId="57C37079"><w:pPr><w:bidi w:val="0"></w:bidi><w:rPr><w:rFonts w:hint="default"></w:rFonts><w:sz w:val="16"></w:sz><w:szCs w:val="20"></w:szCs><w:lang w:val="en-US" w:eastAsia="zh-CN"></w:lang></w:rPr></w:pPr><w:r><w:rPr><w:rFonts w:hint="default"></w:rFonts><w:sz w:val="16"></w:sz><w:szCs w:val="20"></w:szCs><w:lang w:val="en-US" w:eastAsia="zh-CN"></w:lang></w:rPr><w:t>Enhance consumers cultural identity and sense of belonging through product design (f20)</w:t></w:r></w:p><w:p w14:paraId="4D4CCFC2"><w:pPr><w:bidi w:val="0"></w:bidi><w:rPr><w:rFonts w:hint="default"></w:rFonts><w:sz w:val="16"></w:sz><w:szCs w:val="20"></w:szCs><w:lang w:val="en-US" w:eastAsia="zh-CN"></w:lang></w:rPr></w:pPr><w:r><w:rPr><w:rFonts w:hint="default"></w:rFonts><w:sz w:val="16"></w:sz><w:szCs w:val="20"></w:szCs><w:lang w:val="en-US" w:eastAsia="zh-CN"></w:lang></w:rPr><w:t>Integrating traditional elements into modern product design to achieve a fusion of past and present (f21)</w:t></w:r></w:p><w:p w14:paraId="4B758528"><w:pPr><w:bidi w:val="0"></w:bidi><w:rPr><w:rFonts w:hint="default"></w:rFonts><w:sz w:val="16"></w:sz><w:szCs w:val="20"></w:szCs><w:lang w:val="en-US" w:eastAsia="zh-CN"></w:lang></w:rPr></w:pPr><w:r><w:rPr><w:rFonts w:hint="default"></w:rFonts><w:sz w:val="16"></w:sz><w:szCs w:val="20"></w:szCs><w:lang w:val="en-US" w:eastAsia="zh-CN"></w:lang></w:rPr><w:t>Cultural and creative products have a positive impact on social cultural communication and value shaping (f22)</w:t></w:r></w:p><w:p w14:paraId="657A287B"><w:pPr><w:bidi w:val="0"></w:bidi><w:rPr><w:rFonts w:hint="default"></w:rFonts><w:sz w:val="16"></w:sz><w:szCs w:val="20"></w:szCs><w:lang w:val="en-US" w:eastAsia="zh-CN"></w:lang></w:rPr></w:pPr><w:r><w:rPr><w:rFonts w:hint="default"></w:rFonts><w:sz w:val="16"></w:sz><w:szCs w:val="20"></w:szCs><w:lang w:val="en-US" w:eastAsia="zh-CN"></w:lang></w:rPr><w:t>As an important carrier of cultural communication, products promote cultural exchange (f23).</w:t></w:r></w:p><w:p w14:paraId="169F0330"><w:pPr><w:bidi w:val="0"></w:bidi><w:rPr><w:rFonts w:hint="default"></w:rFonts><w:sz w:val="16"></w:sz><w:szCs w:val="20"></w:szCs><w:lang w:val="en-US" w:eastAsia="zh-CN"></w:lang></w:rPr></w:pPr><w:r><w:rPr><w:rFonts w:hint="default"></w:rFonts><w:sz w:val="16"></w:sz><w:szCs w:val="20"></w:szCs><w:lang w:val="en-US" w:eastAsia="zh-CN"></w:lang></w:rPr><w:t>Constantly explore and innovate process technologies to enhance product quality (f24)</w:t></w:r></w:p><w:p w14:paraId="66840A74"><w:pPr><w:bidi w:val="0"></w:bidi><w:rPr><w:rFonts w:hint="default"></w:rFonts><w:sz w:val="16"></w:sz><w:szCs w:val="20"></w:szCs><w:lang w:val="en-US" w:eastAsia="zh-CN"></w:lang></w:rPr></w:pPr><w:r><w:rPr><w:rFonts w:hint="default"></w:rFonts><w:sz w:val="16"></w:sz><w:szCs w:val="20"></w:szCs><w:lang w:val="en-US" w:eastAsia="zh-CN"></w:lang></w:rPr><w:t>Product design meets consumers personalized needs and cultural expression (f25)</w:t></w:r></w:p><w:p w14:paraId="494AD2FE"><w:pPr><w:bidi w:val="0"></w:bidi><w:rPr><w:rFonts w:hint="default"></w:rFonts><w:sz w:val="16"></w:sz><w:szCs w:val="20"></w:szCs><w:lang w:val="en-US" w:eastAsia="zh-CN"></w:lang></w:rPr></w:pPr><w:r><w:rPr><w:rFonts w:hint="default"></w:rFonts><w:sz w:val="16"></w:sz><w:szCs w:val="20"></w:szCs><w:lang w:val="en-US" w:eastAsia="zh-CN"></w:lang></w:rPr><w:t>Promote mutual understanding and respect among people from different cultural backgrounds (f26)</w:t></w:r></w:p><w:p w14:paraId="448193D0"><w:pPr><w:bidi w:val="0"></w:bidi><w:rPr><w:rFonts w:hint="default"></w:rFonts><w:sz w:val="16"></w:sz><w:szCs w:val="20"></w:szCs><w:lang w:val="en-US" w:eastAsia="zh-CN"></w:lang></w:rPr></w:pPr><w:r><w:rPr><w:rFonts w:hint="default"></w:rFonts><w:sz w:val="16"></w:sz><w:szCs w:val="20"></w:szCs><w:lang w:val="en-US" w:eastAsia="zh-CN"></w:lang></w:rPr><w:t>Enhance consumer experience and satisfaction through optimized design (f27)</w:t></w:r></w:p><w:p w14:paraId="06B75FC9"><w:pPr><w:bidi w:val="0"></w:bidi><w:rPr><w:rFonts w:hint="default"></w:rFonts><w:sz w:val="16"></w:sz><w:szCs w:val="20"></w:szCs><w:lang w:val="en-US" w:eastAsia="zh-CN"></w:lang></w:rPr></w:pPr><w:r><w:rPr><w:rFonts w:hint="default"></w:rFonts><w:sz w:val="16"></w:sz><w:szCs w:val="20"></w:szCs><w:lang w:val="en-US" w:eastAsia="zh-CN"></w:lang></w:rPr><w:t>Enhancing National Cultural Confidence and Ethnic Pride (f28)</w:t></w:r></w:p><w:p w14:paraId="7072102A"><w:pPr><w:bidi w:val="0"></w:bidi><w:rPr><w:rFonts w:hint="default"></w:rFonts><w:sz w:val="16"></w:sz><w:szCs w:val="20"></w:szCs><w:lang w:val="en-US" w:eastAsia="zh-CN"></w:lang></w:rPr></w:pPr><w:r><w:rPr><w:rFonts w:hint="default"></w:rFonts><w:sz w:val="16"></w:sz><w:szCs w:val="20"></w:szCs><w:lang w:val="en-US" w:eastAsia="zh-CN"></w:lang></w:rPr><w:t>Integrating aesthetic concepts into daily life to enhance the quality of life (f29)</w:t></w:r></w:p><w:p w14:paraId="3780F42E"><w:pPr><w:bidi w:val="0"></w:bidi><w:rPr><w:rFonts w:hint="default"></w:rFonts><w:sz w:val="16"></w:sz><w:szCs w:val="20"></w:szCs><w:lang w:val="en-US" w:eastAsia="zh-CN"></w:lang></w:rPr></w:pPr><w:r><w:rPr><w:rFonts w:hint="default"></w:rFonts><w:sz w:val="16"></w:sz><w:szCs w:val="20"></w:szCs><w:lang w:val="en-US" w:eastAsia="zh-CN"></w:lang></w:rPr><w:t>Make important contributions to the development and dissemination of social culture (f30)</w:t></w:r></w:p><w:p w14:paraId="5A76A582"><w:pPr><w:bidi w:val="0"></w:bidi><w:rPr><w:rFonts w:hint="default"></w:rFonts><w:sz w:val="16"></w:sz><w:szCs w:val="20"></w:szCs><w:lang w:val="en-US" w:eastAsia="zh-CN"></w:lang></w:rPr></w:pPr><w:r><w:rPr><w:rFonts w:hint="default"></w:rFonts><w:sz w:val="16"></w:sz><w:szCs w:val="20"></w:szCs><w:lang w:val="en-US" w:eastAsia="zh-CN"></w:lang></w:rPr><w:t>Skillfully utilize China-fashion cultural symbols to enhance product competitiveness and create economic benefits (f31)</w:t></w:r></w:p><w:p w14:paraId="6C53C7EE"><w:pPr><w:bidi w:val="0"></w:bidi><w:rPr><w:rFonts w:hint="default"></w:rFonts><w:sz w:val="16"></w:sz><w:szCs w:val="20"></w:szCs><w:lang w:val="en-US" w:eastAsia="zh-CN"></w:lang></w:rPr></w:pPr><w:r><w:rPr><w:rFonts w:hint="default"></w:rFonts><w:sz w:val="16"></w:sz><w:szCs w:val="20"></w:szCs><w:lang w:val="en-US" w:eastAsia="zh-CN"></w:lang></w:rPr><w:t>Exploring new business models to promote the development of cultural and creative industries (f32)</w:t></w:r></w:p><w:p w14:paraId="63003843"><w:pPr><w:bidi w:val="0"></w:bidi><w:rPr><w:rFonts w:hint="default"></w:rFonts><w:sz w:val="16"></w:sz><w:szCs w:val="20"></w:szCs><w:lang w:val="en-US" w:eastAsia="zh-CN"></w:lang></w:rPr></w:pPr><w:r><w:rPr><w:rFonts w:hint="default"></w:rFonts><w:sz w:val="16"></w:sz><w:szCs w:val="20"></w:szCs><w:lang w:val="en-US" w:eastAsia="zh-CN"></w:lang></w:rPr><w:t>Regional inheritors hope that traditional skills can be effectively inherited and innovatively developed, thereby enhancing cultural diversity (f33).</w:t></w:r></w:p><w:p w14:paraId="2181E928"><w:pPr><w:bidi w:val="0"></w:bidi><w:rPr><w:rFonts w:hint="default"></w:rFonts><w:sz w:val="16"></w:sz><w:szCs w:val="20"></w:szCs><w:lang w:val="en-US" w:eastAsia="zh-CN"></w:lang></w:rPr></w:pPr><w:r><w:rPr><w:rFonts w:hint="default"></w:rFonts><w:sz w:val="16"></w:sz><w:szCs w:val="20"></w:szCs><w:lang w:val="en-US" w:eastAsia="zh-CN"></w:lang></w:rPr><w:t>Products can serve as symbols of consumer identity and cultural belonging (f34).</w:t></w:r></w:p><w:p w14:paraId="13688601"><w:pPr><w:bidi w:val="0"></w:bidi><w:rPr><w:rFonts w:hint="default"></w:rFonts><w:sz w:val="16"></w:sz><w:szCs w:val="20"></w:szCs><w:lang w:val="en-US" w:eastAsia="zh-CN"></w:lang></w:rPr></w:pPr><w:r><w:rPr><w:rFonts w:hint="default"></w:rFonts><w:sz w:val="16"></w:sz><w:szCs w:val="20"></w:szCs><w:lang w:val="en-US" w:eastAsia="zh-CN"></w:lang></w:rPr><w:t>The design aims to integrate aesthetic education into the product, enhancing the publics aesthetic appreciation (f35).</w:t></w:r></w:p><w:p w14:paraId="3A468D86"><w:pPr><w:bidi w:val="0"></w:bidi><w:rPr><w:rFonts w:hint="default"></w:rFonts><w:sz w:val="16"></w:sz><w:szCs w:val="20"></w:szCs><w:lang w:val="en-US" w:eastAsia="zh-CN"></w:lang></w:rPr></w:pPr><w:r><w:rPr><w:rFonts w:hint="default"></w:rFonts><w:sz w:val="16"></w:sz><w:szCs w:val="20"></w:szCs><w:lang w:val="en-US" w:eastAsia="zh-CN"></w:lang></w:rPr><w:t>Identify target user groups, pinpoint market demands, and track design trends (f36)</w:t></w:r></w:p><w:p w14:paraId="73A4D513"><w:pPr><w:bidi w:val="0"></w:bidi><w:rPr><w:rFonts w:hint="default"></w:rFonts><w:sz w:val="16"></w:sz><w:szCs w:val="20"></w:szCs><w:lang w:val="en-US" w:eastAsia="zh-CN"></w:lang></w:rPr></w:pPr><w:r><w:rPr><w:rFonts w:hint="default"></w:rFonts><w:sz w:val="16"></w:sz><w:szCs w:val="20"></w:szCs><w:lang w:val="en-US" w:eastAsia="zh-CN"></w:lang></w:rPr><w:t>The effective development and utilization of cultural resources for China-fashion style products to create economic value (f37)</w:t></w:r></w:p><w:p w14:paraId="4902E768"><w:pPr><w:bidi w:val="0"></w:bidi><w:rPr><w:rFonts w:hint="default"></w:rFonts><w:sz w:val="16"></w:sz><w:szCs w:val="20"></w:szCs><w:lang w:val="en-US" w:eastAsia="zh-CN"></w:lang></w:rPr></w:pPr><w:r><w:rPr><w:rFonts w:hint="default"></w:rFonts><w:sz w:val="16"></w:sz><w:szCs w:val="20"></w:szCs><w:lang w:val="en-US" w:eastAsia="zh-CN"></w:lang></w:rPr><w:t>Premium handicrafts as gifts create distinctive competitive advantages in the market, thereby enhancing the competitiveness of cultural and creative products (f38).</w:t></w:r></w:p><w:p w14:paraId="72483213"><w:pPr><w:bidi w:val="0"></w:bidi><w:rPr><w:rFonts w:hint="default"></w:rFonts><w:sz w:val="16"></w:sz><w:szCs w:val="20"></w:szCs><w:lang w:val="en-US" w:eastAsia="zh-CN"></w:lang></w:rPr></w:pPr><w:r><w:rPr><w:rFonts w:hint="default"></w:rFonts><w:sz w:val="16"></w:sz><w:szCs w:val="20"></w:szCs><w:lang w:val="en-US" w:eastAsia="zh-CN"></w:lang></w:rPr><w:t>Optimize the design process to improve efficiency and quality (f39)</w:t></w:r></w:p><w:p w14:paraId="17F17683"><w:pPr><w:bidi w:val="0"></w:bidi><w:rPr><w:rFonts w:hint="default"></w:rFonts><w:sz w:val="16"></w:sz><w:szCs w:val="20"></w:szCs><w:lang w:val="en-US" w:eastAsia="zh-CN"></w:lang></w:rPr></w:pPr><w:r><w:rPr><w:rFonts w:hint="default"></w:rFonts><w:sz w:val="16"></w:sz><w:szCs w:val="20"></w:szCs><w:lang w:val="en-US" w:eastAsia="zh-CN"></w:lang></w:rPr><w:t>The act of gifting cultural products demonstrates their role in cultural dissemination (f40).</w:t></w:r></w:p><w:p w14:paraId="669433E9"><w:pPr><w:bidi w:val="0"></w:bidi><w:rPr><w:rFonts w:hint="default"></w:rFonts><w:sz w:val="16"></w:sz><w:szCs w:val="20"></w:szCs><w:lang w:val="en-US" w:eastAsia="zh-CN"></w:lang></w:rPr></w:pPr><w:r><w:rPr><w:rFonts w:hint="default"></w:rFonts><w:sz w:val="16"></w:sz><w:szCs w:val="20"></w:szCs><w:lang w:val="en-US" w:eastAsia="zh-CN"></w:lang></w:rPr><w:t>Establish an innovative evaluation system to promote product innovation (f41)</w:t></w:r></w:p><w:p w14:paraId="26D87FE1"><w:pPr><w:bidi w:val="0"></w:bidi><w:rPr><w:rFonts w:hint="default"></w:rFonts><w:sz w:val="16"></w:sz><w:szCs w:val="20"></w:szCs><w:lang w:val="en-US" w:eastAsia="zh-CN"></w:lang></w:rPr></w:pPr><w:r><w:rPr><w:rFonts w:hint="default"></w:rFonts><w:sz w:val="16"></w:sz><w:szCs w:val="20"></w:szCs><w:lang w:val="en-US" w:eastAsia="zh-CN"></w:lang></w:rPr><w:t>Exploration of Innovative Application of Traditional Elements (f42)</w:t></w:r></w:p><w:p w14:paraId="5EC77B71"><w:pPr><w:bidi w:val="0"></w:bidi><w:rPr><w:rFonts w:hint="default"></w:rFonts><w:sz w:val="16"></w:sz><w:szCs w:val="20"></w:szCs><w:lang w:val="en-US" w:eastAsia="zh-CN"></w:lang></w:rPr></w:pPr><w:r><w:rPr><w:rFonts w:hint="default"></w:rFonts><w:sz w:val="16"></w:sz><w:szCs w:val="20"></w:szCs><w:lang w:val="en-US" w:eastAsia="zh-CN"></w:lang></w:rPr><w:t>Study consumer behavior in depth to guide product design (f43)</w:t></w:r></w:p><w:p w14:paraId="0AB4F3E4"><w:pPr><w:bidi w:val="0"></w:bidi><w:rPr><w:rFonts w:hint="default"></w:rFonts><w:sz w:val="16"></w:sz><w:szCs w:val="20"></w:szCs><w:lang w:val="en-US" w:eastAsia="zh-CN"></w:lang></w:rPr></w:pPr><w:r><w:rPr><w:rFonts w:hint="default"></w:rFonts><w:sz w:val="16"></w:sz><w:szCs w:val="20"></w:szCs><w:lang w:val="en-US" w:eastAsia="zh-CN"></w:lang></w:rPr><w:t>Differences in daily life aspects such as diet, clothing, and festive celebrations. (f44)</w:t></w:r></w:p></w:tc></w:tr><w:tr w14:paraId="6BB99885"><w:tblPrEx><w:tblBorders><w:top w:val="single" w:color="008000" w:sz="12" w:space="0"></w:top><w:left w:val="none" w:color="auto" w:sz="0" w:space="0"></w:left><w:bottom w:val="single" w:color="auto" w:sz="18" w:space="0"></w:bottom><w:right w:val="none" w:color="auto" w:sz="0" w:space="0"></w:right><w:insideH w:val="none" w:color="auto" w:sz="0" w:space="0"></w:insideH><w:insideV w:val="none" w:color="auto" w:sz="0" w:space="0"></w:insideV></w:tblBorders></w:tblPrEx><w:trPr><w:trHeight w:val="13517" w:hRule="atLeast"></w:trHeight><w:jc w:val="center"></w:jc></w:trPr><w:tc><w:tcPr><w:tcW w:w="1571" w:type="dxa"></w:tcW><w:tcBorders><w:top w:val="nil"></w:top></w:tcBorders><w:shd w:val="clear" w:color="auto" w:fill="auto"></w:shd><w:noWrap w:val="0"></w:noWrap><w:vAlign w:val="center"></w:vAlign></w:tcPr><w:p w14:paraId="19D53D3E"><w:pPr><w:bidi w:val="0"></w:bidi><w:rPr><w:rFonts w:hint="default"></w:rFonts><w:sz w:val="16"></w:sz><w:szCs w:val="20"></w:szCs><w:lang w:val="en-US" w:eastAsia="zh-CN"></w:lang></w:rPr></w:pPr></w:p></w:tc><w:tc><w:tcPr><w:tcW w:w="2034" w:type="dxa"></w:tcW><w:tcBorders><w:top w:val="nil"></w:top></w:tcBorders><w:shd w:val="clear" w:color="auto" w:fill="auto"></w:shd><w:noWrap w:val="0"></w:noWrap><w:vAlign w:val="center"></w:vAlign></w:tcPr><w:p w14:paraId="14A41104"><w:pPr><w:bidi w:val="0"></w:bidi><w:rPr><w:rFonts w:hint="default"></w:rFonts><w:sz w:val="16"></w:sz><w:szCs w:val="20"></w:szCs><w:lang w:val="en-US" w:eastAsia="zh-CN"></w:lang></w:rPr></w:pPr></w:p></w:tc><w:tc><w:tcPr><w:tcW w:w="1755" w:type="dxa"></w:tcW><w:tcBorders><w:top w:val="nil"></w:top></w:tcBorders><w:shd w:val="clear" w:color="auto" w:fill="auto"></w:shd><w:noWrap w:val="0"></w:noWrap><w:vAlign w:val="center"></w:vAlign></w:tcPr><w:p w14:paraId="5B98A9D7"><w:pPr><w:bidi w:val="0"></w:bidi><w:rPr><w:rFonts w:hint="default"></w:rFonts><w:sz w:val="16"></w:sz><w:szCs w:val="20"></w:szCs><w:lang w:val="en-US" w:eastAsia="zh-CN"></w:lang></w:rPr></w:pPr><w:r><w:rPr><w:rFonts w:hint="default"></w:rFonts><w:sz w:val="16"></w:sz><w:szCs w:val="20"></w:szCs><w:lang w:val="en-US" w:eastAsia="zh-CN"></w:lang></w:rPr><w:t>f45 Technology brings new development</w:t></w:r></w:p><w:p w14:paraId="74497367"><w:pPr><w:bidi w:val="0"></w:bidi><w:rPr><w:rFonts w:hint="default"></w:rFonts><w:sz w:val="16"></w:sz><w:szCs w:val="20"></w:szCs><w:lang w:val="en-US" w:eastAsia="zh-CN"></w:lang></w:rPr></w:pPr><w:r><w:rPr><w:rFonts w:hint="default"></w:rFonts><w:sz w:val="16"></w:sz><w:szCs w:val="20"></w:szCs><w:lang w:val="en-US" w:eastAsia="zh-CN"></w:lang></w:rPr><w:t>f46 Design Quality Assessment</w:t></w:r></w:p><w:p w14:paraId="7EDF8EBA"><w:pPr><w:bidi w:val="0"></w:bidi><w:rPr><w:rFonts w:hint="default"></w:rFonts><w:sz w:val="16"></w:sz><w:szCs w:val="20"></w:szCs><w:lang w:val="en-US" w:eastAsia="zh-CN"></w:lang></w:rPr></w:pPr><w:r><w:rPr><w:rFonts w:hint="default"></w:rFonts><w:sz w:val="16"></w:sz><w:szCs w:val="20"></w:szCs><w:lang w:val="en-US" w:eastAsia="zh-CN"></w:lang></w:rPr><w:t>f47 Market Trend Analysis</w:t></w:r></w:p><w:p w14:paraId="5C6625EE"><w:pPr><w:bidi w:val="0"></w:bidi><w:rPr><w:rFonts w:hint="default"></w:rFonts><w:sz w:val="16"></w:sz><w:szCs w:val="20"></w:szCs><w:lang w:val="en-US" w:eastAsia="zh-CN"></w:lang></w:rPr></w:pPr><w:r><w:rPr><w:rFonts w:hint="default"></w:rFonts><w:sz w:val="16"></w:sz><w:szCs w:val="20"></w:szCs><w:lang w:val="en-US" w:eastAsia="zh-CN"></w:lang></w:rPr><w:t>f48 Value Expression Method</w:t></w:r></w:p><w:p w14:paraId="66ACEF06"><w:pPr><w:bidi w:val="0"></w:bidi><w:rPr><w:rFonts w:hint="default"></w:rFonts><w:sz w:val="16"></w:sz><w:szCs w:val="20"></w:szCs><w:lang w:val="en-US" w:eastAsia="zh-CN"></w:lang></w:rPr></w:pPr><w:r><w:rPr><w:rFonts w:hint="default"></w:rFonts><w:sz w:val="16"></w:sz><w:szCs w:val="20"></w:szCs><w:lang w:val="en-US" w:eastAsia="zh-CN"></w:lang></w:rPr><w:t>f49 Innovation Balance Point</w:t></w:r></w:p><w:p w14:paraId="3FC41718"><w:pPr><w:bidi w:val="0"></w:bidi><w:rPr><w:rFonts w:hint="default"></w:rFonts><w:sz w:val="16"></w:sz><w:szCs w:val="20"></w:szCs><w:lang w:val="en-US" w:eastAsia="zh-CN"></w:lang></w:rPr></w:pPr><w:r><w:rPr><w:rFonts w:hint="default"></w:rFonts><w:sz w:val="16"></w:sz><w:szCs w:val="20"></w:szCs><w:lang w:val="en-US" w:eastAsia="zh-CN"></w:lang></w:rPr><w:t>f50 User Experience Optimization</w:t></w:r></w:p><w:p w14:paraId="07C84B6A"><w:pPr><w:bidi w:val="0"></w:bidi><w:rPr><w:rFonts w:hint="default"></w:rFonts><w:sz w:val="16"></w:sz><w:szCs w:val="20"></w:szCs><w:lang w:val="en-US" w:eastAsia="zh-CN"></w:lang></w:rPr></w:pPr><w:r><w:rPr><w:rFonts w:hint="default"></w:rFonts><w:sz w:val="16"></w:sz><w:szCs w:val="20"></w:szCs><w:lang w:val="en-US" w:eastAsia="zh-CN"></w:lang></w:rPr><w:t>The F51 model of heritage and innovation</w:t></w:r></w:p><w:p w14:paraId="44B14B18"><w:pPr><w:bidi w:val="0"></w:bidi><w:rPr><w:rFonts w:hint="default"></w:rFonts><w:sz w:val="16"></w:sz><w:szCs w:val="20"></w:szCs><w:lang w:val="en-US" w:eastAsia="zh-CN"></w:lang></w:rPr></w:pPr><w:r><w:rPr><w:rFonts w:hint="default"></w:rFonts><w:sz w:val="16"></w:sz><w:szCs w:val="20"></w:szCs><w:lang w:val="en-US" w:eastAsia="zh-CN"></w:lang></w:rPr><w:t>f52 innovative methodology</w:t></w:r></w:p><w:p w14:paraId="49E5C71B"><w:pPr><w:bidi w:val="0"></w:bidi><w:rPr><w:rFonts w:hint="default"></w:rFonts><w:sz w:val="16"></w:sz><w:szCs w:val="20"></w:szCs><w:lang w:val="en-US" w:eastAsia="zh-CN"></w:lang></w:rPr></w:pPr><w:r><w:rPr><w:rFonts w:hint="default"></w:rFonts><w:sz w:val="16"></w:sz><w:szCs w:val="20"></w:szCs><w:lang w:val="en-US" w:eastAsia="zh-CN"></w:lang></w:rPr><w:t>The uniqueness of f53 has been well received.</w:t></w:r></w:p><w:p w14:paraId="3F9B7447"><w:pPr><w:bidi w:val="0"></w:bidi><w:rPr><w:rFonts w:hint="default"></w:rFonts><w:sz w:val="16"></w:sz><w:szCs w:val="20"></w:szCs><w:lang w:val="en-US" w:eastAsia="zh-CN"></w:lang></w:rPr></w:pPr><w:r><w:rPr><w:rFonts w:hint="default"></w:rFonts><w:sz w:val="16"></w:sz><w:szCs w:val="20"></w:szCs><w:lang w:val="en-US" w:eastAsia="zh-CN"></w:lang></w:rPr><w:t>f54 Mechanism of Identity Construction</w:t></w:r></w:p><w:p w14:paraId="5543FFE3"><w:pPr><w:bidi w:val="0"></w:bidi><w:rPr><w:rFonts w:hint="default"></w:rFonts><w:sz w:val="16"></w:sz><w:szCs w:val="20"></w:szCs><w:lang w:val="en-US" w:eastAsia="zh-CN"></w:lang></w:rPr></w:pPr><w:r><w:rPr><w:rFonts w:hint="default"></w:rFonts><w:sz w:val="16"></w:sz><w:szCs w:val="20"></w:szCs><w:lang w:val="en-US" w:eastAsia="zh-CN"></w:lang></w:rPr><w:t>f55: Pathway of Fusion and Innovation</w:t></w:r></w:p><w:p w14:paraId="34C0977C"><w:pPr><w:bidi w:val="0"></w:bidi><w:rPr><w:rFonts w:hint="default"></w:rFonts><w:sz w:val="16"></w:sz><w:szCs w:val="20"></w:szCs><w:lang w:val="en-US" w:eastAsia="zh-CN"></w:lang></w:rPr></w:pPr><w:r><w:rPr><w:rFonts w:hint="default"></w:rFonts><w:sz w:val="16"></w:sz><w:szCs w:val="20"></w:szCs><w:lang w:val="en-US" w:eastAsia="zh-CN"></w:lang></w:rPr><w:t>f56 Development Mechanism</w:t></w:r></w:p><w:p w14:paraId="450A9475"><w:pPr><w:bidi w:val="0"></w:bidi><w:rPr><w:rFonts w:hint="default"></w:rFonts><w:sz w:val="16"></w:sz><w:szCs w:val="20"></w:szCs><w:lang w:val="en-US" w:eastAsia="zh-CN"></w:lang></w:rPr></w:pPr><w:r><w:rPr><w:rFonts w:hint="default"></w:rFonts><w:sz w:val="16"></w:sz><w:szCs w:val="20"></w:szCs><w:lang w:val="en-US" w:eastAsia="zh-CN"></w:lang></w:rPr><w:t>f57 National Financial Support</w:t></w:r></w:p><w:p w14:paraId="32C09916"><w:pPr><w:bidi w:val="0"></w:bidi><w:rPr><w:rFonts w:hint="default"></w:rFonts><w:sz w:val="16"></w:sz><w:szCs w:val="20"></w:szCs><w:lang w:val="en-US" w:eastAsia="zh-CN"></w:lang></w:rPr></w:pPr><w:r><w:rPr><w:rFonts w:hint="default"></w:rFonts><w:sz w:val="16"></w:sz><w:szCs w:val="20"></w:szCs><w:lang w:val="en-US" w:eastAsia="zh-CN"></w:lang></w:rPr><w:t>f58 National Industrial Support</w:t></w:r></w:p><w:p w14:paraId="32630260"><w:pPr><w:bidi w:val="0"></w:bidi><w:rPr><w:rFonts w:hint="default"></w:rFonts><w:sz w:val="16"></w:sz><w:szCs w:val="20"></w:szCs><w:lang w:val="en-US" w:eastAsia="zh-CN"></w:lang></w:rPr></w:pPr><w:r><w:rPr><w:rFonts w:hint="default"></w:rFonts><w:sz w:val="16"></w:sz><w:szCs w:val="20"></w:szCs><w:lang w:val="en-US" w:eastAsia="zh-CN"></w:lang></w:rPr><w:t>f59 Different Colors Express Different Emotions</w:t></w:r></w:p><w:p w14:paraId="3A37C5C3"><w:pPr><w:bidi w:val="0"></w:bidi><w:rPr><w:rFonts w:hint="default"></w:rFonts><w:sz w:val="16"></w:sz><w:szCs w:val="20"></w:szCs><w:lang w:val="en-US" w:eastAsia="zh-CN"></w:lang></w:rPr></w:pPr><w:r><w:rPr><w:rFonts w:hint="default"></w:rFonts><w:sz w:val="16"></w:sz><w:szCs w:val="20"></w:szCs><w:lang w:val="en-US" w:eastAsia="zh-CN"></w:lang></w:rPr><w:t>f60 Enhance the level of sustainable development</w:t></w:r></w:p><w:p w14:paraId="54A39B82"><w:pPr><w:bidi w:val="0"></w:bidi><w:rPr><w:rFonts w:hint="default"></w:rFonts><w:sz w:val="16"></w:sz><w:szCs w:val="20"></w:szCs><w:lang w:val="en-US" w:eastAsia="zh-CN"></w:lang></w:rPr></w:pPr><w:r><w:rPr><w:rFonts w:hint="default"></w:rFonts><w:sz w:val="16"></w:sz><w:szCs w:val="20"></w:szCs><w:lang w:val="en-US" w:eastAsia="zh-CN"></w:lang></w:rPr><w:t>f61 Enhance Product Competitiveness</w:t></w:r></w:p><w:p w14:paraId="51EFA1AA"><w:pPr><w:bidi w:val="0"></w:bidi><w:rPr><w:rFonts w:hint="default"></w:rFonts><w:sz w:val="16"></w:sz><w:szCs w:val="20"></w:szCs><w:lang w:val="en-US" w:eastAsia="zh-CN"></w:lang></w:rPr></w:pPr><w:r><w:rPr><w:rFonts w:hint="default"></w:rFonts><w:sz w:val="16"></w:sz><w:szCs w:val="20"></w:szCs><w:lang w:val="en-US" w:eastAsia="zh-CN"></w:lang></w:rPr><w:t>f62 Theme Fit</w:t></w:r></w:p><w:p w14:paraId="0A8A1C40"><w:pPr><w:bidi w:val="0"></w:bidi><w:rPr><w:rFonts w:hint="default"></w:rFonts><w:sz w:val="16"></w:sz><w:szCs w:val="20"></w:szCs><w:lang w:val="en-US" w:eastAsia="zh-CN"></w:lang></w:rPr></w:pPr><w:r><w:rPr><w:rFonts w:hint="default"></w:rFonts><w:sz w:val="16"></w:sz><w:szCs w:val="20"></w:szCs><w:lang w:val="en-US" w:eastAsia="zh-CN"></w:lang></w:rPr><w:t>f63 Emotional Resonance</w:t></w:r></w:p><w:p w14:paraId="236BF58D"><w:pPr><w:bidi w:val="0"></w:bidi><w:rPr><w:rFonts w:hint="default"></w:rFonts><w:sz w:val="16"></w:sz><w:szCs w:val="20"></w:szCs><w:lang w:val="en-US" w:eastAsia="zh-CN"></w:lang></w:rPr></w:pPr><w:r><w:rPr><w:rFonts w:hint="default"></w:rFonts><w:sz w:val="16"></w:sz><w:szCs w:val="20"></w:szCs><w:lang w:val="en-US" w:eastAsia="zh-CN"></w:lang></w:rPr><w:t>f64 color authenticity</w:t></w:r></w:p></w:tc><w:tc><w:tcPr><w:tcW w:w="3875" w:type="dxa"></w:tcW><w:tcBorders><w:top w:val="nil"></w:top></w:tcBorders><w:shd w:val="clear" w:color="auto" w:fill="auto"></w:shd><w:noWrap w:val="0"></w:noWrap><w:vAlign w:val="center"></w:vAlign></w:tcPr><w:p w14:paraId="5D7D4997"><w:pPr><w:bidi w:val="0"></w:bidi><w:rPr><w:rFonts w:hint="default"></w:rFonts><w:sz w:val="16"></w:sz><w:szCs w:val="20"></w:szCs><w:lang w:val="en-US" w:eastAsia="zh-CN"></w:lang></w:rPr></w:pPr><w:r><w:rPr><w:rFonts w:hint="default"></w:rFonts><w:sz w:val="16"></w:sz><w:szCs w:val="20"></w:szCs><w:lang w:val="en-US" w:eastAsia="zh-CN"></w:lang></w:rPr><w:t>Different technological advancements drive distinct design evolution (f45)</w:t></w:r></w:p><w:p w14:paraId="5314EC6F"><w:pPr><w:bidi w:val="0"></w:bidi><w:rPr><w:rFonts w:hint="default"></w:rFonts><w:sz w:val="16"></w:sz><w:szCs w:val="20"></w:szCs><w:lang w:val="en-US" w:eastAsia="zh-CN"></w:lang></w:rPr></w:pPr><w:r><w:rPr><w:rFonts w:hint="default"></w:rFonts><w:sz w:val="16"></w:sz><w:szCs w:val="20"></w:szCs><w:lang w:val="en-US" w:eastAsia="zh-CN"></w:lang></w:rPr><w:t>Establish design quality evaluation standards to enhance design capabilities (f46)</w:t></w:r></w:p><w:p w14:paraId="2281803D"><w:pPr><w:bidi w:val="0"></w:bidi><w:rPr><w:rFonts w:hint="default"></w:rFonts><w:sz w:val="16"></w:sz><w:szCs w:val="20"></w:szCs><w:lang w:val="en-US" w:eastAsia="zh-CN"></w:lang></w:rPr></w:pPr><w:r><w:rPr><w:rFonts w:hint="default"></w:rFonts><w:sz w:val="16"></w:sz><w:szCs w:val="20"></w:szCs><w:lang w:val="en-US" w:eastAsia="zh-CN"></w:lang></w:rPr><w:t>Accurately grasp market trends and guide product development (f47)</w:t></w:r></w:p><w:p w14:paraId="171C4174"><w:pPr><w:bidi w:val="0"></w:bidi><w:rPr><w:rFonts w:hint="default"></w:rFonts><w:sz w:val="16"></w:sz><w:szCs w:val="20"></w:szCs><w:lang w:val="en-US" w:eastAsia="zh-CN"></w:lang></w:rPr></w:pPr><w:r><w:rPr><w:rFonts w:hint="default"></w:rFonts><w:sz w:val="16"></w:sz><w:szCs w:val="20"></w:szCs><w:lang w:val="en-US" w:eastAsia="zh-CN"></w:lang></w:rPr><w:t>Exploring the Diversified Manifestations of Cultural Values (f48)</w:t></w:r></w:p><w:p w14:paraId="443EB1A8"><w:pPr><w:bidi w:val="0"></w:bidi><w:rPr><w:rFonts w:hint="default"></w:rFonts><w:sz w:val="16"></w:sz><w:szCs w:val="20"></w:szCs><w:lang w:val="en-US" w:eastAsia="zh-CN"></w:lang></w:rPr></w:pPr><w:r><w:rPr><w:rFonts w:hint="default"></w:rFonts><w:sz w:val="16"></w:sz><w:szCs w:val="20"></w:szCs><w:lang w:val="en-US" w:eastAsia="zh-CN"></w:lang></w:rPr><w:t>Finding the best balance between tradition and modern innovation (f49)</w:t></w:r></w:p><w:p w14:paraId="005CD475"><w:pPr><w:bidi w:val="0"></w:bidi><w:rPr><w:rFonts w:hint="default"></w:rFonts><w:sz w:val="16"></w:sz><w:szCs w:val="20"></w:szCs><w:lang w:val="en-US" w:eastAsia="zh-CN"></w:lang></w:rPr></w:pPr><w:r><w:rPr><w:rFonts w:hint="default"></w:rFonts><w:sz w:val="16"></w:sz><w:szCs w:val="20"></w:szCs><w:lang w:val="en-US" w:eastAsia="zh-CN"></w:lang></w:rPr><w:t>Continuously optimize user experience and product satisfaction (f50)</w:t></w:r></w:p><w:p w14:paraId="5A7B5FA8"><w:pPr><w:bidi w:val="0"></w:bidi><w:rPr><w:rFonts w:hint="default"></w:rFonts><w:sz w:val="16"></w:sz><w:szCs w:val="20"></w:szCs><w:lang w:val="en-US" w:eastAsia="zh-CN"></w:lang></w:rPr></w:pPr><w:r><w:rPr><w:rFonts w:hint="default"></w:rFonts><w:sz w:val="16"></w:sz><w:szCs w:val="20"></w:szCs><w:lang w:val="en-US" w:eastAsia="zh-CN"></w:lang></w:rPr><w:t>Exploring Effective Models of Cultural Inheritance and Innovation (f51)</w:t></w:r></w:p><w:p w14:paraId="35B890D1"><w:pPr><w:bidi w:val="0"></w:bidi><w:rPr><w:rFonts w:hint="default"></w:rFonts><w:sz w:val="16"></w:sz><w:szCs w:val="20"></w:szCs><w:lang w:val="en-US" w:eastAsia="zh-CN"></w:lang></w:rPr></w:pPr><w:r><w:rPr><w:rFonts w:hint="default"></w:rFonts><w:sz w:val="16"></w:sz><w:szCs w:val="20"></w:szCs><w:lang w:val="en-US" w:eastAsia="zh-CN"></w:lang></w:rPr><w:t>Develop creative and personalized products for target audiences, and establish a systematic innovation methodology framework (f52).</w:t></w:r></w:p><w:p w14:paraId="48FFAC99"><w:pPr><w:bidi w:val="0"></w:bidi><w:rPr><w:rFonts w:hint="default"></w:rFonts><w:sz w:val="16"></w:sz><w:szCs w:val="20"></w:szCs><w:lang w:val="en-US" w:eastAsia="zh-CN"></w:lang></w:rPr></w:pPr><w:r><w:rPr><w:rFonts w:hint="default"></w:rFonts><w:sz w:val="16"></w:sz><w:szCs w:val="20"></w:szCs><w:lang w:val="en-US" w:eastAsia="zh-CN"></w:lang></w:rPr><w:t>Unique products enable precise and personalized market positioning (f53)</w:t></w:r></w:p><w:p w14:paraId="1BF02C8A"><w:pPr><w:bidi w:val="0"></w:bidi><w:rPr><w:rFonts w:hint="default"></w:rFonts><w:sz w:val="16"></w:sz><w:szCs w:val="20"></w:szCs><w:lang w:val="en-US" w:eastAsia="zh-CN"></w:lang></w:rPr></w:pPr><w:r><w:rPr><w:rFonts w:hint="default"></w:rFonts><w:sz w:val="16"></w:sz><w:szCs w:val="20"></w:szCs><w:lang w:val="en-US" w:eastAsia="zh-CN"></w:lang></w:rPr><w:t>The Formation and Development Mechanism of Cultural Identity</w:t></w:r></w:p><w:p w14:paraId="72FCD299"><w:pPr><w:bidi w:val="0"></w:bidi><w:rPr><w:rFonts w:hint="default"></w:rFonts><w:sz w:val="16"></w:sz><w:szCs w:val="20"></w:szCs><w:lang w:val="en-US" w:eastAsia="zh-CN"></w:lang></w:rPr></w:pPr><w:r><w:rPr><w:rFonts w:hint="default"></w:rFonts><w:sz w:val="16"></w:sz><w:szCs w:val="20"></w:szCs><w:lang w:val="en-US" w:eastAsia="zh-CN"></w:lang></w:rPr><w:t>Exploring the Fusion and Innovation Path of Traditional Culture and Modern Design</w:t></w:r></w:p><w:p w14:paraId="47580EF1"><w:pPr><w:bidi w:val="0"></w:bidi><w:rPr><w:rFonts w:hint="default"></w:rFonts><w:sz w:val="16"></w:sz><w:szCs w:val="20"></w:szCs><w:lang w:val="en-US" w:eastAsia="zh-CN"></w:lang></w:rPr></w:pPr><w:r><w:rPr><w:rFonts w:hint="default"></w:rFonts><w:sz w:val="16"></w:sz><w:szCs w:val="20"></w:szCs><w:lang w:val="en-US" w:eastAsia="zh-CN"></w:lang></w:rPr><w:t>Establishing a Sustainable Development Mechanism for Cultural and Creative Industries (f56)</w:t></w:r></w:p><w:p w14:paraId="2ACA0383"><w:pPr><w:bidi w:val="0"></w:bidi><w:rPr><w:rFonts w:hint="default"></w:rFonts><w:sz w:val="16"></w:sz><w:szCs w:val="20"></w:szCs><w:lang w:val="en-US" w:eastAsia="zh-CN"></w:lang></w:rPr></w:pPr><w:r><w:rPr><w:rFonts w:hint="default"></w:rFonts><w:sz w:val="16"></w:sz><w:szCs w:val="20"></w:szCs><w:lang w:val="en-US" w:eastAsia="zh-CN"></w:lang></w:rPr><w:t>Support the development of cultural and creative products through direct subsidies, tax reductions, and fiscal interest subsidies. (f57)</w:t></w:r></w:p><w:p w14:paraId="7A2E3655"><w:pPr><w:bidi w:val="0"></w:bidi><w:rPr><w:rFonts w:hint="default"></w:rFonts><w:sz w:val="16"></w:sz><w:szCs w:val="20"></w:szCs><w:lang w:val="en-US" w:eastAsia="zh-CN"></w:lang></w:rPr></w:pPr><w:r><w:rPr><w:rFonts w:hint="default"></w:rFonts><w:sz w:val="16"></w:sz><w:szCs w:val="20"></w:szCs><w:lang w:val="en-US" w:eastAsia="zh-CN"></w:lang></w:rPr><w:t>To support the cultural and creative industry, preferential policies have been introduced to encourage cultural heritage institutions and social organizations to collaborate in developing high-quality cultural and creative products. (f58)</w:t></w:r></w:p><w:p w14:paraId="5C66A50E"><w:pPr><w:bidi w:val="0"></w:bidi><w:rPr><w:rFonts w:hint="default"></w:rFonts><w:sz w:val="16"></w:sz><w:szCs w:val="20"></w:szCs><w:lang w:val="en-US" w:eastAsia="zh-CN"></w:lang></w:rPr></w:pPr><w:r><w:rPr><w:rFonts w:hint="default"></w:rFonts><w:sz w:val="16"></w:sz><w:szCs w:val="20"></w:szCs><w:lang w:val="en-US" w:eastAsia="zh-CN"></w:lang></w:rPr><w:t>Different colors evoke distinct emotional responses and carry specific symbolic meanings in cultural, historical, and religious contexts. (f59)</w:t></w:r></w:p><w:p w14:paraId="2BA4A2B8"><w:pPr><w:bidi w:val="0"></w:bidi><w:rPr><w:rFonts w:hint="default"></w:rFonts><w:sz w:val="16"></w:sz><w:szCs w:val="20"></w:szCs><w:lang w:val="en-US" w:eastAsia="zh-CN"></w:lang></w:rPr></w:pPr><w:r><w:rPr><w:rFonts w:hint="default"></w:rFonts><w:sz w:val="16"></w:sz><w:szCs w:val="20"></w:szCs><w:lang w:val="en-US" w:eastAsia="zh-CN"></w:lang></w:rPr><w:t>Environmental design contributes to the sustainable development of the cultural and creative industries, promoting the rational use of resources and environmentally friendly protection. (f60)</w:t></w:r></w:p><w:p w14:paraId="426DEF1D"><w:pPr><w:bidi w:val="0"></w:bidi><w:rPr><w:rFonts w:hint="default"></w:rFonts><w:sz w:val="16"></w:sz><w:szCs w:val="20"></w:szCs><w:lang w:val="en-US" w:eastAsia="zh-CN"></w:lang></w:rPr></w:pPr><w:r><w:rPr><w:rFonts w:hint="default"></w:rFonts><w:sz w:val="16"></w:sz><w:szCs w:val="20"></w:szCs><w:lang w:val="en-US" w:eastAsia="zh-CN"></w:lang></w:rPr><w:t>In the competitive market, consumers carefully weigh their options when purchasing cultural and creative products. (f61)</w:t></w:r></w:p><w:p w14:paraId="6785C64F"><w:pPr><w:bidi w:val="0"></w:bidi><w:rPr><w:rFonts w:hint="default"></w:rFonts><w:sz w:val="16"></w:sz><w:szCs w:val="20"></w:szCs><w:lang w:val="en-US" w:eastAsia="zh-CN"></w:lang></w:rPr></w:pPr><w:r><w:rPr><w:rFonts w:hint="default"></w:rFonts><w:sz w:val="16"></w:sz><w:szCs w:val="20"></w:szCs><w:lang w:val="en-US" w:eastAsia="zh-CN"></w:lang></w:rPr><w:t>Different materials have unique textures, patterns, and colors that convey specific cultural messages and emotions. (f62)</w:t></w:r></w:p><w:p w14:paraId="4594C3E6"><w:pPr><w:bidi w:val="0"></w:bidi><w:rPr><w:rFonts w:hint="default"></w:rFonts><w:sz w:val="16"></w:sz><w:szCs w:val="20"></w:szCs><w:lang w:val="en-US" w:eastAsia="zh-CN"></w:lang></w:rPr></w:pPr><w:r><w:rPr><w:rFonts w:hint="default"></w:rFonts><w:sz w:val="16"></w:sz><w:szCs w:val="20"></w:szCs><w:lang w:val="en-US" w:eastAsia="zh-CN"></w:lang></w:rPr><w:t>Nostalgia arises across cultures, groups, and age groups, aligning with modern peoples pursuit of security and belonging. (f63)</w:t></w:r></w:p><w:p w14:paraId="30C6E7C9"><w:pPr><w:bidi w:val="0"></w:bidi><w:rPr><w:rFonts w:hint="default"></w:rFonts><w:sz w:val="16"></w:sz><w:szCs w:val="20"></w:szCs><w:lang w:val="en-US" w:eastAsia="zh-CN"></w:lang></w:rPr></w:pPr><w:r><w:rPr><w:rFonts w:hint="default"></w:rFonts><w:sz w:val="16"></w:sz><w:szCs w:val="20"></w:szCs><w:lang w:val="en-US" w:eastAsia="zh-CN"></w:lang></w:rPr><w:t>The colors should be extracted from the original culture to maintain their authenticity, and then supplemented with auxiliary colors according to the demands of the times and trends to broaden their audience. (f64)</w:t></w:r></w:p></w:tc></w:tr></w:tbl><w:p w14:paraId="36198C6B"><w:pPr><w:ind w:left="0" w:leftChars="0" w:firstLine="0" w:firstLineChars="0"></w:ind></w:pPr></w:p><w:sectPr><w:footerReference r:id="rId5" w:type="default"></w:footerReference><w:pgSz w:w="11906" w:h="16838"></w:pgSz><w:pgMar w:top="720" w:right="720" w:bottom="720" w:left="720" w:header="851" w:footer="992" w:gutter="0"></w:pgMar><w:cols w:space="425" w:num="1"></w:cols><w:docGrid w:type="lines" w:linePitch="312" w:charSpace="0"></w:docGrid></w:sectPr></w:body></w:document>
