# Supplementary material for: From Cultural Symbols to User Value Construction:A Grounded Theory Study of Heritage-Based Creative Products
Source: Research Square preprint supplement (doi:10.21203/rs.3.rs-8448462/v1), 2026-01-29
Supplement: Supplementary file 5 [file 9929b1f76f139695b7d89aa9.docx › word/endnotes.xml]

<?xml version="1.0" encoding="UTF-8" standalone="yes"?>
<w:endnotes xmlns:wpc="http://schemas.microsoft.com/office/word/2010/wordprocessingCanvas" xmlns:mc="http://schemas.openxmlformats.org/markup-compatibility/2006" xmlns:o="urn:schemas-microsoft-com:office:office" xmlns:r="http://schemas.openxmlformats.org/officeDocument/2006/relationships" xmlns:m="http://schemas.openxmlformats.org/officeDocument/2006/math" xmlns:v="urn:schemas-microsoft-com:vml" xmlns:wp14="http://schemas.microsoft.com/office/word/2010/wordprocessingDrawing" xmlns:wp="http://schemas.openxmlformats.org/drawingml/2006/wordprocessingDrawing" xmlns:w="http://schemas.openxmlformats.org/wordprocessingml/2006/main" xmlns:w14="http://schemas.microsoft.com/office/word/2010/wordml" xmlns:w15="http://schemas.microsoft.com/office/word/2012/wordml" xmlns:w10="urn:schemas-microsoft-com:office:word" xmlns:wpg="http://schemas.microsoft.com/office/word/2010/wordprocessingGroup" xmlns:wpi="http://schemas.microsoft.com/office/word/2010/wordprocessingInk" xmlns:wne="http://schemas.microsoft.com/office/word/2006/wordml" xmlns:wps="http://schemas.microsoft.com/office/word/2010/wordprocessingShape" xmlns:wpsCustomData="http://www.wps.cn/officeDocument/2013/wpsCustomData" mc:Ignorable="w14 w15 wp14"><w:endnote w:type="separator" w:id="0"><w:p><w:pPr><w:ind w:firstLine="420"/></w:pPr><w:r><w:separator/></w:r></w:p></w:endnote><w:endnote w:type="continuationSeparator" w:id="1"><w:p><w:pPr><w:ind w:firstLine="420"/></w:pPr><w:r><w:continuationSeparator/></w:r></w:p></w:endnote></w:endnotes>
