# Supplementary material for: From Cultural Symbols to User Value Construction:A Grounded Theory Study of Heritage-Based Creative Products
Source: Research Square preprint supplement (doi:10.21203/rs.3.rs-8448462/v1), 2026-01-29
Supplement: Supplementary file 5 [file 9929b1f76f139695b7d89aa9.docx › word/fontTable.xml]

<?xml version="1.0" encoding="UTF-8" standalone="yes"?>
<w:fonts xmlns:mc="http://schemas.openxmlformats.org/markup-compatibility/2006" xmlns:r="http://schemas.openxmlformats.org/officeDocument/2006/relationships" xmlns:w="http://schemas.openxmlformats.org/wordprocessingml/2006/main" xmlns:w14="http://schemas.microsoft.com/office/word/2010/wordml" mc:Ignorable="w14"><w:font w:name="Times New Roman"><w:panose1 w:val="02020603050405020304"/><w:charset w:val="00"/><w:family w:val="roman"/><w:pitch w:val="variable"/><w:sig w:usb0="20007A87" w:usb1="80000000" w:usb2="00000008" w:usb3="00000000" w:csb0="000001FF" w:csb1="00000000"/></w:font><w:font w:name="宋体"><w:altName w:val="汉仪书宋二KW"/><w:panose1 w:val="00000000000000000000"/><w:charset w:val="00"/><w:family w:val="auto"/><w:pitch w:val="default"/><w:sig w:usb0="00000000" w:usb1="00000000" w:usb2="00000000" w:usb3="00000000" w:csb0="00000000" w:csb1="00000000"/></w:font><w:font w:name="Wingdings"><w:panose1 w:val="05000000000000000000"/><w:charset w:val="02"/><w:family w:val="auto"/><w:pitch w:val="default"/><w:sig w:usb0="00000000" w:usb1="00000000" w:usb2="00000000" w:usb3="00000000" w:csb0="80000000" w:csb1="00000000"/></w:font><w:font w:name="Arial"><w:panose1 w:val="020B0704020202090204"/><w:charset w:val="01"/><w:family w:val="swiss"/><w:pitch w:val="default"/><w:sig w:usb0="E0000AFF" w:usb1="00007843" w:usb2="00000001" w:usb3="00000000" w:csb0="400001BF" w:csb1="DFF70000"/></w:font><w:font w:name="黑体"><w:altName w:val="汉仪中黑KW"/><w:panose1 w:val="02010609060101010101"/><w:charset w:val="86"/><w:family w:val="auto"/><w:pitch w:val="default"/><w:sig w:usb0="800002BF" w:usb1="38CF7CFA" w:usb2="00000016" w:usb3="00000000" w:csb0="00040001" w:csb1="00000000"/></w:font><w:font w:name="Courier New"><w:panose1 w:val="02070409020205090404"/><w:charset w:val="01"/><w:family w:val="modern"/><w:pitch w:val="default"/><w:sig w:usb0="E0000AFF" w:usb1="40007843" w:usb2="00000001" w:usb3="00000000" w:csb0="400001BF" w:csb1="DFF70000"/></w:font><w:font w:name="Symbol"><w:altName w:val="Kingsoft Sign"/><w:panose1 w:val="05050102010706020507"/><w:charset w:val="02"/><w:family w:val="roman"/><w:pitch w:val="default"/><w:sig w:usb0="00000000" w:usb1="00000000" w:usb2="00000000" w:usb3="00000000" w:csb0="80000000" w:csb1="00000000"/></w:font><w:font w:name="Calibri"><w:altName w:val="Helvetica Neue"/><w:panose1 w:val="020F0502020204030204"/><w:charset w:val="00"/><w:family w:val="swiss"/><w:pitch w:val="default"/><w:sig w:usb0="00000000" w:usb1="00000000" w:usb2="00000001" w:usb3="00000000" w:csb0="0000019F" w:csb1="00000000"/></w:font><w:font w:name="汉仪书宋二KW"><w:panose1 w:val="00020600040101010101"/><w:charset w:val="86"/><w:family w:val="auto"/><w:pitch w:val="default"/><w:sig w:usb0="A00002BF" w:usb1="18EF7CFA" w:usb2="00000016" w:usb3="00000000" w:csb0="00040000" w:csb1="00000000"/></w:font><w:font w:name="Helvetica Neue"><w:panose1 w:val="02000503000000020004"/><w:charset w:val="00"/><w:family w:val="auto"/><w:pitch w:val="default"/><w:sig w:usb0="E50002FF" w:usb1="500079DB" w:usb2="00000010" w:usb3="00000000" w:csb0="00000000" w:csb1="00000000"/></w:font><w:font w:name="汉仪中黑KW"><w:panose1 w:val="00020600040101010101"/><w:charset w:val="86"/><w:family w:val="auto"/><w:pitch w:val="default"/><w:sig w:usb0="A00002BF" w:usb1="18EF7CFA" w:usb2="00000016" w:usb3="00000000" w:csb0="00040000" w:csb1="00000000"/></w:font><w:font w:name="Kingsoft Sign"><w:panose1 w:val="05050102010706020507"/><w:charset w:val="00"/><w:family w:val="auto"/><w:pitch w:val="default"/><w:sig w:usb0="00000000" w:usb1="10000000" w:usb2="00000000" w:usb3="00000000" w:csb0="00000001" w:csb1="00000000"/></w:font></w:fonts>
