# Supplementary material for: From Cultural Symbols to User Value Construction:A Grounded Theory Study of Heritage-Based Creative Products
Source: Research Square preprint supplement (doi:10.21203/rs.3.rs-8448462/v1), 2026-01-29
Supplement: Supplementary file 5 [file 9929b1f76f139695b7d89aa9.docx › word/footer1.xml]

<?xml version="1.0" encoding="UTF-8" standalone="yes"?><w:ftr xmlns:wpc="http://schemas.microsoft.com/office/word/2010/wordprocessingCanvas" xmlns:mc="http://schemas.openxmlformats.org/markup-compatibility/2006" xmlns:o="urn:schemas-microsoft-com:office:office" xmlns:r="http://schemas.openxmlformats.org/officeDocument/2006/relationships" xmlns:m="http://schemas.openxmlformats.org/officeDocument/2006/math" xmlns:v="urn:schemas-microsoft-com:vml" xmlns:wp14="http://schemas.microsoft.com/office/word/2010/wordprocessingDrawing" xmlns:wp="http://schemas.openxmlformats.org/drawingml/2006/wordprocessingDrawing" xmlns:w10="urn:schemas-microsoft-com:office:word" xmlns:w="http://schemas.openxmlformats.org/wordprocessingml/2006/main" xmlns:w14="http://schemas.microsoft.com/office/word/2010/wordml" xmlns:w15="http://schemas.microsoft.com/office/word/2012/wordml" xmlns:wpg="http://schemas.microsoft.com/office/word/2010/wordprocessingGroup" xmlns:wpi="http://schemas.microsoft.com/office/word/2010/wordprocessingInk" xmlns:wne="http://schemas.microsoft.com/office/word/2006/wordml" xmlns:wps="http://schemas.microsoft.com/office/word/2010/wordprocessingShape" xmlns:wpsCustomData="http://www.wps.cn/officeDocument/2013/wpsCustomData" mc:Ignorable="w14 w15 wp14"><w:p w14:paraId="1D10C646"><w:pPr><w:pStyle w:val="5"></w:pStyle></w:pPr><w:r><w:rPr><w:sz w:val="18"></w:sz></w:rPr><mc:AlternateContent><mc:Choice Requires="wps"><w:drawing><wp:anchor distT="0" distB="0" distL="114300" distR="114300" simplePos="0" relativeHeight="251659264" behindDoc="0" locked="0" layoutInCell="1" allowOverlap="1"><wp:simplePos x="0" y="0"></wp:simplePos><wp:positionH relativeFrom="margin"><wp:align>center</wp:align></wp:positionH><wp:positionV relativeFrom="paragraph"><wp:posOffset>0</wp:posOffset></wp:positionV><wp:extent cx="1828800" cy="1828800"></wp:extent><wp:effectExtent l="0" t="0" r="0" b="0"></wp:effectExtent><wp:wrapNone></wp:wrapNone><wp:docPr id="1" name="文本框 1"></wp:docPr><wp:cNvGraphicFramePr></wp:cNvGraphicFramePr><a:graphic xmlns:a="http://schemas.openxmlformats.org/drawingml/2006/main"><a:graphicData uri="http://schemas.microsoft.com/office/word/2010/wordprocessingShape"><wps:wsp><wps:cNvSpPr txBox="1"></wps:cNvSpPr><wps:spPr><a:xfrm><a:off x="0" y="0"></a:off><a:ext cx="1828800" cy="1828800"></a:ext></a:xfrm><a:prstGeom prst="rect"><a:avLst></a:avLst></a:prstGeom><a:noFill></a:noFill><a:ln w="6350"><a:noFill></a:noFill></a:ln><a:extLst><a:ext uri="{909E8E84-426E-40DD-AFC4-6F175D3DCCD1}"><a14:hiddenFill xmlns:a14="http://schemas.microsoft.com/office/drawing/2010/main"><a:solidFill><a:schemeClr val="lt1"></a:schemeClr></a:solidFill></a14:hiddenFill></a:ext><a:ext uri="{91240B29-F687-4F45-9708-019B960494DF}"><a14:hiddenLine xmlns:a14="http://schemas.microsoft.com/office/drawing/2010/main" w="6350"><a:solidFill><a:prstClr val="black"></a:prstClr></a:solidFill></a14:hiddenLine></a:ext></a:extLst></wps:spPr><wps:style><a:lnRef idx="0"><a:schemeClr val="accent1"></a:schemeClr></a:lnRef><a:fillRef idx="0"><a:schemeClr val="accent1"></a:schemeClr></a:fillRef><a:effectRef idx="0"><a:schemeClr val="accent1"></a:schemeClr></a:effectRef><a:fontRef idx="minor"><a:schemeClr val="dk1"></a:schemeClr></a:fontRef></wps:style><wps:txbx><w:txbxContent><w:p w14:paraId="6ADEB0A9"><w:pPr><w:pStyle w:val="5"></w:pStyle></w:pPr><w:r><w:fldChar w:fldCharType="begin"></w:fldChar></w:r><w:r><w:instrText xml:space="preserve"> PAGE  \* MERGEFORMAT </w:instrText></w:r><w:r><w:fldChar w:fldCharType="separate"></w:fldChar></w:r><w:r><w:t>1</w:t></w:r><w:r><w:fldChar w:fldCharType="end"></w:fldChar></w:r></w:p></w:txbxContent></wps:txbx><wps:bodyPr rot="0" spcFirstLastPara="0" vertOverflow="overflow" horzOverflow="overflow" vert="horz" wrap="none" lIns="0" tIns="0" rIns="0" bIns="0" numCol="1" spcCol="0" rtlCol="0" fromWordArt="0" anchor="t" anchorCtr="0" forceAA="0" upright="0" compatLnSpc="1"><a:spAutoFit></a:spAutoFit></wps:bodyPr></wps:wsp></a:graphicData></a:graphic></wp:anchor></w:drawing></mc:Choice><mc:Fallback><w:pict><v:shape id="_x0000_s1026" o:spid="_x0000_s1026" o:spt="202" type="#_x0000_t202" style="position:absolute;left:0pt;margin-top:0pt;height:144pt;width:144pt;mso-position-horizontal:center;mso-position-horizontal-relative:margin;mso-wrap-style:none;z-index:251659264;mso-width-relative:page;mso-height-relative:page;" filled="f" stroked="f" coordsize="21600,21600" o:gfxdata="UEsDBAoAAAAAAIdO4kAAAAAAAAAAAAAAAAAEAAAAZHJzL1BLAwQUAAAACACHTuJAs0lY7tAAAAAF
AQAADwAAAGRycy9kb3ducmV2LnhtbE2PQUvDQBCF74L/YRmhN7tpKxJiNgVL06Ng48HjNjsm0d3Z
sLtN4793FEEvwzze8OZ75XZ2VkwY4uBJwWqZgUBqvRmoU/DS1Lc5iJg0GW09oYJPjLCtrq9KXRh/
oWecjqkTHEKx0Ar6lMZCytj26HRc+hGJvTcfnE4sQydN0BcOd1aus+xeOj0Qf+j1iLse24/j2SnY
1U0TJozBvuKh3rw/Pd7hflZqcbPKHkAknNPfMXzjMzpUzHTyZzJRWAVcJP1M9tZ5zvL0u8iqlP/p
qy9QSwMEFAAAAAgAh07iQEi29ifcAgAAJAYAAA4AAABkcnMvZTJvRG9jLnhtbK1UzW7UMBC+I/EO
lu9pkm26zUbNVttNg5AqWqkgzl7H2Vg4tmV7fwriCm/AiQt3nqvPwTjZ7LYFoUqwh+zYM56Z75uf
s/NtK9CaGcuVzHF8FGHEJFUVl8scv3tbBilG1hFZEaEky/Eds/h8+vLF2UZnbKQaJSpmEDiRNtvo
HDfO6SwMLW1YS+yR0kyCslamJQ6OZhlWhmzAeyvCURSNw40ylTaKMmvhtuiVeOfRPMehqmtOWaHo
qmXS9V4NE8QBJNtwbfG0y7auGXXXdW2ZQyLHgNR1XwgC8sJ/w+kZyZaG6IbTXQrkOSk8wdQSLiHo
3lVBHEErw39z1XJqlFW1O6KqDXsgHSOAIo6ecHPbEM06LEC11XvS7f9zS9+sbwziFXQCRpK0UPD7
b1/vv/+8//EFxZ6ejbYZWN1qsHPbC7X1prt7C5ce9bY2rf8HPAj0QO7dnly2dYj6R+koTSNQUdAN
B/ATHp5rY90rplrkhRwbqF5HKllfWdebDiY+mlQlFwLuSSYk2uR4fHwSdQ/2GnAupDeALMDHTuor
82kSTS7TyzQJktH4Mkiioghm5TwJxmV8elIcF/N5EX/2/uIka3hVMenjDV0SJ8+rwq5T+vru+8Qq
wSvvzqdkzXIxFwatCXRp2f08w5D8A7PwcRqdGlA9gRSPkuhiNAnKcXoaJGVyEkxOozSI4snFZBwl
k6QoH0O64pL9O6RH7D9ImmS+YHtsC0Hoh79C8+kcoAEDQ+FC34d9v3nJbRdboMiLC1XdQW8a1Q+3
1bTkEPSKWHdDDEwz9BzsO3cNn1oo6BO1kzBqlPn4p3tvD+UFLUYb2A45lrAMMRKvJQwfOHSDYAZh
MQhy1c4VFBIGCnLpRHhgnBjE2qj2PSzBmY8BKiIpRMqxG8S56zcULFHKZrPOaKUNXzb9A1gdmrgr
eaupD9O1kJ6tHMxDNyYHVoBKf4Dl0ZG6W3R+Oz08d1aH5T79BVBLAwQKAAAAAACHTuJAAAAAAAAA
AAAAAAAABgAAAF9yZWxzL1BLAwQUAAAACACHTuJAihRmPNEAAACUAQAACwAAAF9yZWxzLy5yZWxz
pZDBasMwDIbvg72D0X1xmsMYo04vo9Br6R7A2IpjGltGMtn69vMOg2X0tqN+oe8T//7wmRa1Ikuk
bGDX9aAwO/IxBwPvl+PTCyipNnu7UEYDNxQ4jI8P+zMutrYjmWMR1ShZDMy1lletxc2YrHRUMLfN
RJxsbSMHXay72oB66Ptnzb8ZMG6Y6uQN8MkPoC630sx/2Ck6JqGpdo6SpmmK7h5VB7Zlju7INuEb
uUazHLAa8CwaB2pZ134EfV+/+6fe00c+47rVfoeM649Xb7ocvwBQSwMEFAAAAAgAh07iQH7m5SD3
AAAA4QEAABMAAABbQ29udGVudF9UeXBlc10ueG1slZFBTsMwEEX3SNzB8hYlTrtACCXpgrRLQKgc
YGRPEotkbHlMaG+Pk7YbRJFY2jP/vye73BzGQUwY2Dqq5CovpEDSzljqKvm+32UPUnAEMjA4wkoe
keWmvr0p90ePLFKauJJ9jP5RKdY9jsC580hp0rowQkzH0CkP+gM6VOuiuFfaUUSKWZw7ZF022MLn
EMX2kK5PJgEHluLptDizKgneD1ZDTKZqIvODkp0JeUouO9xbz3dJQ6pfCfPkOuCce0lPE6xB8Qoh
PsOYNJQJrIz7ooBT/nfJbDly5trWasybwE2KveF0sbrWjmvXOP3f8u2SunSr5YPqb1BLAQIUABQA
AAAIAIdO4kB+5uUg9wAAAOEBAAATAAAAAAAAAAEAIAAAAEUFAABbQ29udGVudF9UeXBlc10ueG1s
UEsBAhQACgAAAAAAh07iQAAAAAAAAAAAAAAAAAYAAAAAAAAAAAAQAAAAJwQAAF9yZWxzL1BLAQIU
ABQAAAAIAIdO4kCKFGY80QAAAJQBAAALAAAAAAAAAAEAIAAAAEsEAABfcmVscy8ucmVsc1BLAQIU
AAoAAAAAAIdO4kAAAAAAAAAAAAAAAAAEAAAAAAAAAAAAEAAAAAAAAABkcnMvUEsBAhQAFAAAAAgA
h07iQLNJWO7QAAAABQEAAA8AAAAAAAAAAQAgAAAAIgAAAGRycy9kb3ducmV2LnhtbFBLAQIUABQA
AAAIAIdO4kBItvYn3AIAACQGAAAOAAAAAAAAAAEAIAAAAB8BAABkcnMvZTJvRG9jLnhtbFBLBQYA
AAAABgAGAFkBAABtBgAAAAA=
"><v:fill on="f" focussize="0,0"></v:fill><v:stroke on="f" weight="0.5pt"></v:stroke><v:imagedata o:title=""></v:imagedata><o:lock v:ext="edit" aspectratio="f"></o:lock><v:textbox inset="0mm,0mm,0mm,0mm" style="mso-fit-shape-to-text:t;"><w:txbxContent><w:p w14:paraId="6ADEB0A9"><w:pPr><w:pStyle w:val="5"></w:pStyle></w:pPr><w:r><w:fldChar w:fldCharType="begin"></w:fldChar></w:r><w:r><w:instrText xml:space="preserve"> PAGE  \* MERGEFORMAT </w:instrText></w:r><w:r><w:fldChar w:fldCharType="separate"></w:fldChar></w:r><w:r><w:t>1</w:t></w:r><w:r><w:fldChar w:fldCharType="end"></w:fldChar></w:r></w:p></w:txbxContent></v:textbox></v:shape></w:pict></mc:Fallback></mc:AlternateContent></w:r></w:p></w:ftr>
