# Supplementary material for: From Cultural Symbols to User Value Construction:A Grounded Theory Study of Heritage-Based Creative Products
Source: Research Square preprint supplement (doi:10.21203/rs.3.rs-8448462/v1), 2026-01-29
Supplement: Supplementary file 5 [file 9929b1f76f139695b7d89aa9.docx › word/settings.xml]

<?xml version="1.0" encoding="UTF-8" standalone="yes"?>
<w:settings xmlns:mc="http://schemas.openxmlformats.org/markup-compatibility/2006" xmlns:o="urn:schemas-microsoft-com:office:office" xmlns:r="http://schemas.openxmlformats.org/officeDocument/2006/relationships" xmlns:m="http://schemas.openxmlformats.org/officeDocument/2006/math" xmlns:v="urn:schemas-microsoft-com:vml" xmlns:w10="urn:schemas-microsoft-com:office:word" xmlns:w="http://schemas.openxmlformats.org/wordprocessingml/2006/main" xmlns:w14="http://schemas.microsoft.com/office/word/2010/wordml" xmlns:sl="http://schemas.openxmlformats.org/schemaLibrary/2006/main" xmlns:wpsCustomData="http://www.wps.cn/officeDocument/2013/wpsCustomData" mc:Ignorable="w14"><w:zoom w:percent="81"/><w:embedSystemFonts/><w:bordersDoNotSurroundHeader w:val="1"/><w:bordersDoNotSurroundFooter w:val="1"/><w:documentProtection w:enforcement="0"/><w:defaultTabStop w:val="420"/><w:drawingGridVerticalSpacing w:val="156"/><w:displayHorizontalDrawingGridEvery w:val="0"/><w:displayVerticalDrawingGridEvery w:val="2"/><w:characterSpacingControl w:val="compressPunctuation"/><w:footnotePr><w:footnote w:id="0"/><w:footnote w:id="1"/></w:footnotePr><w:endnotePr><w:endnote w:id="0"/><w:endnote w:id="1"/></w:endnotePr><w:compat><w:spaceForUL/><w:balanceSingleByteDoubleByteWidth/><w:doNotLeaveBackslashAlone/><w:ulTrailSpace/><w:doNotExpandShiftReturn/><w:adjustLineHeightInTable/><w:useFELayout/><w:compatSetting w:name="compatibilityMode" w:uri="http://schemas.microsoft.com/office/word" w:val="14"/><w:compatSetting w:name="overrideTableStyleFontSizeAndJustification" w:uri="http://schemas.microsoft.com/office/word" w:val="1"/><w:compatSetting w:name="enableOpenTypeFeatures" w:uri="http://schemas.microsoft.com/office/word" w:val="1"/><w:compatSetting w:name="doNotFlipMirrorIndents" w:uri="http://schemas.microsoft.com/office/word" w:val="1"/></w:compat><w:rsids><w:rsidRoot w:val="F17FC6AD"/><w:rsid w:val="3FFB7C33"/><w:rsid w:val="7FD2DD5A"/><w:rsid w:val="9F3F1D9E"/><w:rsid w:val="CFDCA621"/><w:rsid w:val="E5FF794D"/><w:rsid w:val="F17FC6AD"/><w:rsid w:val="FCA76187"/><w:rsid w:val="FEFF84B9"/><w:rsid w:val="FFC31D4D"/><w:rsid w:val="FFFEA526"/></w:rsids><m:mathPr><m:mathFont m:val="Cambria Math"/><m:brkBin m:val="before"/><m:brkBinSub m:val="--"/><m:smallFrac m:val="0"/><m:dispDef/><m:lMargin m:val="0"/><m:rMargin m:val="0"/><m:defJc m:val="centerGroup"/><m:wrapIndent m:val="1440"/><m:intLim m:val="subSup"/><m:naryLim m:val="undOvr"/></m:mathPr><w:themeFontLang w:val="en-US" w:eastAsia="zh-CN"/><w:clrSchemeMapping w:bg1="light1" w:t1="dark1" w:bg2="light2" w:t2="dark2" w:accent1="accent1" w:accent2="accent2" w:accent3="accent3" w:accent4="accent4" w:accent5="accent5" w:accent6="accent6" w:hyperlink="hyperlink" w:followedHyperlink="followedHyperlink"/><w:doNotIncludeSubdocsInStats/></w:settings>
