# Supplementary material for: From Cultural Symbols to User Value Construction:A Grounded Theory Study of Heritage-Based Creative Products
Source: Research Square preprint supplement (doi:10.21203/rs.3.rs-8448462/v1), 2026-01-29
Supplement: Supplementary file 5 [file 9929b1f76f139695b7d89aa9.docx › word/styles.xml]

<?xml version="1.0" encoding="UTF-8" standalone="yes"?>
<w:styles xmlns:mc="http://schemas.openxmlformats.org/markup-compatibility/2006" xmlns:o="urn:schemas-microsoft-com:office:office" xmlns:r="http://schemas.openxmlformats.org/officeDocument/2006/relationships" xmlns:m="http://schemas.openxmlformats.org/officeDocument/2006/math" xmlns:v="urn:schemas-microsoft-com:vml" xmlns:w="http://schemas.openxmlformats.org/wordprocessingml/2006/main" xmlns:w14="http://schemas.microsoft.com/office/word/2010/wordml" xmlns:w10="urn:schemas-microsoft-com:office:word" xmlns:sl="http://schemas.openxmlformats.org/schemaLibrary/2006/main" xmlns:wpsCustomData="http://www.wps.cn/officeDocument/2013/wpsCustomData" mc:Ignorable="w14"><w:docDefaults><w:rPrDefault><w:rPr><w:rFonts w:asciiTheme="minorHAnsi" w:hAnsiTheme="minorHAnsi" w:eastAsiaTheme="minorEastAsia" w:cstheme="minorBidi"/></w:rPr></w:rPrDefault><w:pPrDefault/></w:docDefaults><w:latentStyles w:count="260" w:defQFormat="0" w:defUnhideWhenUsed="1" w:defSemiHidden="1" w:defUIPriority="99" w:defLockedState="0"><w:lsdException w:qFormat="1" w:unhideWhenUsed="0" w:uiPriority="0" w:semiHidden="0" w:name="Normal"/><w:lsdException w:qFormat="1" w:unhideWhenUsed="0" w:uiPriority="0" w:semiHidden="0" w:name="heading 1"/><w:lsdException w:qFormat="1" w:uiPriority="0" w:name="heading 2"/><w:lsdException w:qFormat="1" w:uiPriority="0" w:name="heading 3"/><w:lsdException w:qFormat="1" w:uiPriority="0" w:name="heading 4"/><w:lsdException w:qFormat="1" w:uiPriority="0" w:name="heading 5"/><w:lsdException w:qFormat="1" w:uiPriority="0" w:name="heading 6"/><w:lsdException w:qFormat="1" w:uiPriority="0" w:name="heading 7"/><w:lsdException w:qFormat="1" w:uiPriority="0" w:name="heading 8"/><w:lsdException w:qFormat="1" w:uiPriority="0" w:name="heading 9"/><w:lsdException w:unhideWhenUsed="0" w:uiPriority="0" w:semiHidden="0" w:name="index 1"/><w:lsdException w:unhideWhenUsed="0" w:uiPriority="0" w:semiHidden="0" w:name="index 2"/><w:lsdException w:unhideWhenUsed="0" w:uiPriority="0" w:semiHidden="0" w:name="index 3"/><w:lsdException w:unhideWhenUsed="0" w:uiPriority="0" w:semiHidden="0" w:name="index 4"/><w:lsdException w:unhideWhenUsed="0" w:uiPriority="0" w:semiHidden="0" w:name="index 5"/><w:lsdException w:unhideWhenUsed="0" w:uiPriority="0" w:semiHidden="0" w:name="index 6"/><w:lsdException w:unhideWhenUsed="0" w:uiPriority="0" w:semiHidden="0" w:name="index 7"/><w:lsdException w:unhideWhenUsed="0" w:uiPriority="0" w:semiHidden="0" w:name="index 8"/><w:lsdException w:unhideWhenUsed="0" w:uiPriority="0" w:semiHidden="0" w:name="index 9"/><w:lsdException w:unhideWhenUsed="0" w:uiPriority="0" w:semiHidden="0" w:name="toc 1"/><w:lsdException w:unhideWhenUsed="0" w:uiPriority="0" w:semiHidden="0" w:name="toc 2"/><w:lsdException w:unhideWhenUsed="0" w:uiPriority="0" w:semiHidden="0" w:name="toc 3"/><w:lsdException w:unhideWhenUsed="0" w:uiPriority="0" w:semiHidden="0" w:name="toc 4"/><w:lsdException w:unhideWhenUsed="0" w:uiPriority="0" w:semiHidden="0" w:name="toc 5"/><w:lsdException w:unhideWhenUsed="0" w:uiPriority="0" w:semiHidden="0" w:name="toc 6"/><w:lsdException w:unhideWhenUsed="0" w:uiPriority="0" w:semiHidden="0" w:name="toc 7"/><w:lsdException w:unhideWhenUsed="0" w:uiPriority="0" w:semiHidden="0" w:name="toc 8"/><w:lsdException w:unhideWhenUsed="0" w:uiPriority="0" w:semiHidden="0" w:name="toc 9"/><w:lsdException w:unhideWhenUsed="0" w:uiPriority="0" w:semiHidden="0" w:name="Normal Indent"/><w:lsdException w:unhideWhenUsed="0" w:uiPriority="0" w:semiHidden="0" w:name="footnote text"/><w:lsdException w:unhideWhenUsed="0" w:uiPriority="0" w:semiHidden="0" w:name="annotation text"/><w:lsdException w:unhideWhenUsed="0" w:uiPriority="0" w:semiHidden="0" w:name="header"/><w:lsdException w:unhideWhenUsed="0" w:uiPriority="0" w:semiHidden="0" w:name="footer"/><w:lsdException w:unhideWhenUsed="0" w:uiPriority="0" w:semiHidden="0" w:name="index heading"/><w:lsdException w:qFormat="1" w:uiPriority="0" w:name="caption"/><w:lsdException w:unhideWhenUsed="0" w:uiPriority="0" w:semiHidden="0" w:name="table of figures"/><w:lsdException w:unhideWhenUsed="0" w:uiPriority="0" w:semiHidden="0" w:name="envelope address"/><w:lsdException w:unhideWhenUsed="0" w:uiPriority="0" w:semiHidden="0" w:name="envelope return"/><w:lsdException w:unhideWhenUsed="0" w:uiPriority="0" w:semiHidden="0" w:name="footnote reference"/><w:lsdException w:unhideWhenUsed="0" w:uiPriority="0" w:semiHidden="0" w:name="annotation reference"/><w:lsdException w:unhideWhenUsed="0" w:uiPriority="0" w:semiHidden="0" w:name="line number"/><w:lsdException w:unhideWhenUsed="0" w:uiPriority="0" w:semiHidden="0" w:name="page number"/><w:lsdException w:unhideWhenUsed="0" w:uiPriority="0" w:semiHidden="0" w:name="endnote reference"/><w:lsdException w:unhideWhenUsed="0" w:uiPriority="0" w:semiHidden="0" w:name="endnote text"/><w:lsdException w:unhideWhenUsed="0" w:uiPriority="0" w:semiHidden="0" w:name="table of authorities"/><w:lsdException w:unhideWhenUsed="0" w:uiPriority="0" w:semiHidden="0" w:name="macro"/><w:lsdException w:unhideWhenUsed="0" w:uiPriority="0" w:semiHidden="0" w:name="toa heading"/><w:lsdException w:unhideWhenUsed="0" w:uiPriority="0" w:semiHidden="0" w:name="List"/><w:lsdException w:unhideWhenUsed="0" w:uiPriority="0" w:semiHidden="0" w:name="List Bullet"/><w:lsdException w:unhideWhenUsed="0" w:uiPriority="0" w:semiHidden="0" w:name="List Number"/><w:lsdException w:unhideWhenUsed="0" w:uiPriority="0" w:semiHidden="0" w:name="List 2"/><w:lsdException w:unhideWhenUsed="0" w:uiPriority="0" w:semiHidden="0" w:name="List 3"/><w:lsdException w:unhideWhenUsed="0" w:uiPriority="0" w:semiHidden="0" w:name="List 4"/><w:lsdException w:unhideWhenUsed="0" w:uiPriority="0" w:semiHidden="0" w:name="List 5"/><w:lsdException w:unhideWhenUsed="0" w:uiPriority="0" w:semiHidden="0" w:name="List Bullet 2"/><w:lsdException w:unhideWhenUsed="0" w:uiPriority="0" w:semiHidden="0" w:name="List Bullet 3"/><w:lsdException w:unhideWhenUsed="0" w:uiPriority="0" w:semiHidden="0" w:name="List Bullet 4"/><w:lsdException w:unhideWhenUsed="0" w:uiPriority="0" w:semiHidden="0" w:name="List Bullet 5"/><w:lsdException w:unhideWhenUsed="0" w:uiPriority="0" w:semiHidden="0" w:name="List Number 2"/><w:lsdException w:unhideWhenUsed="0" w:uiPriority="0" w:semiHidden="0" w:name="List Number 3"/><w:lsdException w:unhideWhenUsed="0" w:uiPriority="0" w:semiHidden="0" w:name="List Number 4"/><w:lsdException w:unhideWhenUsed="0" w:uiPriority="0" w:semiHidden="0" w:name="List Number 5"/><w:lsdException w:qFormat="1" w:unhideWhenUsed="0" w:uiPriority="0" w:semiHidden="0" w:name="Title"/><w:lsdException w:unhideWhenUsed="0" w:uiPriority="0" w:semiHidden="0" w:name="Closing"/><w:lsdException w:unhideWhenUsed="0" w:uiPriority="0" w:semiHidden="0" w:name="Signature"/><w:lsdException w:qFormat="1" w:unhideWhenUsed="0" w:uiPriority="0" w:name="Default Paragraph Font"/><w:lsdException w:unhideWhenUsed="0" w:uiPriority="0" w:semiHidden="0" w:name="Body Text"/><w:lsdException w:unhideWhenUsed="0" w:uiPriority="0" w:semiHidden="0" w:name="Body Text Indent"/><w:lsdException w:unhideWhenUsed="0" w:uiPriority="0" w:semiHidden="0" w:name="List Continue"/><w:lsdException w:unhideWhenUsed="0" w:uiPriority="0" w:semiHidden="0" w:name="List Continue 2"/><w:lsdException w:unhideWhenUsed="0" w:uiPriority="0" w:semiHidden="0" w:name="List Continue 3"/><w:lsdException w:unhideWhenUsed="0" w:uiPriority="0" w:semiHidden="0" w:name="List Continue 4"/><w:lsdException w:unhideWhenUsed="0" w:uiPriority="0" w:semiHidden="0" w:name="List Continue 5"/><w:lsdException w:unhideWhenUsed="0" w:uiPriority="0" w:semiHidden="0" w:name="Message Header"/><w:lsdException w:qFormat="1" w:unhideWhenUsed="0" w:uiPriority="0" w:semiHidden="0" w:name="Subtitle"/><w:lsdException w:unhideWhenUsed="0" w:uiPriority="0" w:semiHidden="0" w:name="Salutation"/><w:lsdException w:unhideWhenUsed="0" w:uiPriority="0" w:semiHidden="0" w:name="Date"/><w:lsdException w:unhideWhenUsed="0" w:uiPriority="0" w:semiHidden="0" w:name="Body Text First Indent"/><w:lsdException w:unhideWhenUsed="0" w:uiPriority="0" w:semiHidden="0" w:name="Body Text First Indent 2"/><w:lsdException w:unhideWhenUsed="0" w:uiPriority="0" w:semiHidden="0" w:name="Note Heading"/><w:lsdException w:unhideWhenUsed="0" w:uiPriority="0" w:semiHidden="0" w:name="Body Text 2"/><w:lsdException w:unhideWhenUsed="0" w:uiPriority="0" w:semiHidden="0" w:name="Body Text 3"/><w:lsdException w:unhideWhenUsed="0" w:uiPriority="0" w:semiHidden="0" w:name="Body Text Indent 2"/><w:lsdException w:unhideWhenUsed="0" w:uiPriority="0" w:semiHidden="0" w:name="Body Text Indent 3"/><w:lsdException w:unhideWhenUsed="0" w:uiPriority="0" w:semiHidden="0" w:name="Block Text"/><w:lsdException w:unhideWhenUsed="0" w:uiPriority="0" w:semiHidden="0" w:name="Hyperlink"/><w:lsdException w:unhideWhenUsed="0" w:uiPriority="0" w:semiHidden="0" w:name="FollowedHyperlink"/><w:lsdException w:qFormat="1" w:unhideWhenUsed="0" w:uiPriority="0" w:semiHidden="0" w:name="Strong"/><w:lsdException w:qFormat="1" w:unhideWhenUsed="0" w:uiPriority="0" w:semiHidden="0" w:name="Emphasis"/><w:lsdException w:unhideWhenUsed="0" w:uiPriority="0" w:semiHidden="0" w:name="Document Map"/><w:lsdException w:unhideWhenUsed="0" w:uiPriority="0" w:semiHidden="0" w:name="Plain Text"/><w:lsdException w:unhideWhenUsed="0" w:uiPriority="0" w:semiHidden="0" w:name="E-mail Signature"/><w:lsdException w:unhideWhenUsed="0" w:uiPriority="0" w:semiHidden="0" w:name="Normal (Web)"/><w:lsdException w:unhideWhenUsed="0" w:uiPriority="0" w:semiHidden="0" w:name="HTML Acronym"/><w:lsdException w:unhideWhenUsed="0" w:uiPriority="0" w:semiHidden="0" w:name="HTML Address"/><w:lsdException w:unhideWhenUsed="0" w:uiPriority="0" w:semiHidden="0" w:name="HTML Cite"/><w:lsdException w:unhideWhenUsed="0" w:uiPriority="0" w:semiHidden="0" w:name="HTML Code"/><w:lsdException w:unhideWhenUsed="0" w:uiPriority="0" w:semiHidden="0" w:name="HTML Definition"/><w:lsdException w:unhideWhenUsed="0" w:uiPriority="0" w:semiHidden="0" w:name="HTML Keyboard"/><w:lsdException w:unhideWhenUsed="0" w:uiPriority="0" w:semiHidden="0" w:name="HTML Preformatted"/><w:lsdException w:unhideWhenUsed="0" w:uiPriority="0" w:semiHidden="0" w:name="HTML Sample"/><w:lsdException w:unhideWhenUsed="0" w:uiPriority="0" w:semiHidden="0" w:name="HTML Typewriter"/><w:lsdException w:unhideWhenUsed="0" w:uiPriority="0" w:semiHidden="0" w:name="HTML Variable"/><w:lsdException w:qFormat="1" w:unhideWhenUsed="0" w:uiPriority="0" w:name="Normal Table"/><w:lsdException w:unhideWhenUsed="0" w:uiPriority="0" w:semiHidden="0" w:name="annotation subject"/><w:lsdException w:unhideWhenUsed="0" w:uiPriority="0" w:semiHidden="0" w:name="Table Simple 1"/><w:lsdException w:unhideWhenUsed="0" w:uiPriority="0" w:semiHidden="0" w:name="Table Simple 2"/><w:lsdException w:unhideWhenUsed="0" w:uiPriority="0" w:semiHidden="0" w:name="Table Simple 3"/><w:lsdException w:unhideWhenUsed="0" w:uiPriority="0" w:semiHidden="0" w:name="Table Classic 1"/><w:lsdException w:unhideWhenUsed="0" w:uiPriority="0" w:semiHidden="0" w:name="Table Classic 2"/><w:lsdException w:unhideWhenUsed="0" w:uiPriority="0" w:semiHidden="0" w:name="Table Classic 3"/><w:lsdException w:unhideWhenUsed="0" w:uiPriority="0" w:semiHidden="0" w:name="Table Classic 4"/><w:lsdException w:unhideWhenUsed="0" w:uiPriority="0" w:semiHidden="0" w:name="Table Colorful 1"/><w:lsdException w:unhideWhenUsed="0" w:uiPriority="0" w:semiHidden="0" w:name="Table Colorful 2"/><w:lsdException w:unhideWhenUsed="0" w:uiPriority="0" w:semiHidden="0" w:name="Table Colorful 3"/><w:lsdException w:unhideWhenUsed="0" w:uiPriority="0" w:semiHidden="0" w:name="Table Columns 1"/><w:lsdException w:unhideWhenUsed="0" w:uiPriority="0" w:semiHidden="0" w:name="Table Columns 2"/><w:lsdException w:unhideWhenUsed="0" w:uiPriority="0" w:semiHidden="0" w:name="Table Columns 3"/><w:lsdException w:unhideWhenUsed="0" w:uiPriority="0" w:semiHidden="0" w:name="Table Columns 4"/><w:lsdException w:unhideWhenUsed="0" w:uiPriority="0" w:semiHidden="0" w:name="Table Columns 5"/><w:lsdException w:unhideWhenUsed="0" w:uiPriority="0" w:semiHidden="0" w:name="Table Grid 1"/><w:lsdException w:unhideWhenUsed="0" w:uiPriority="0" w:semiHidden="0" w:name="Table Grid 2"/><w:lsdException w:unhideWhenUsed="0" w:uiPriority="0" w:semiHidden="0" w:name="Table Grid 3"/><w:lsdException w:unhideWhenUsed="0" w:uiPriority="0" w:semiHidden="0" w:name="Table Grid 4"/><w:lsdException w:unhideWhenUsed="0" w:uiPriority="0" w:semiHidden="0" w:name="Table Grid 5"/><w:lsdException w:unhideWhenUsed="0" w:uiPriority="0" w:semiHidden="0" w:name="Table Grid 6"/><w:lsdException w:unhideWhenUsed="0" w:uiPriority="0" w:semiHidden="0" w:name="Table Grid 7"/><w:lsdException w:unhideWhenUsed="0" w:uiPriority="0" w:semiHidden="0" w:name="Table Grid 8"/><w:lsdException w:unhideWhenUsed="0" w:uiPriority="0" w:semiHidden="0" w:name="Table List 1"/><w:lsdException w:unhideWhenUsed="0" w:uiPriority="0" w:semiHidden="0" w:name="Table List 2"/><w:lsdException w:unhideWhenUsed="0" w:uiPriority="0" w:semiHidden="0" w:name="Table List 3"/><w:lsdException w:unhideWhenUsed="0" w:uiPriority="0" w:semiHidden="0" w:name="Table List 4"/><w:lsdException w:unhideWhenUsed="0" w:uiPriority="0" w:semiHidden="0" w:name="Table List 5"/><w:lsdException w:unhideWhenUsed="0" w:uiPriority="0" w:semiHidden="0" w:name="Table List 6"/><w:lsdException w:unhideWhenUsed="0" w:uiPriority="0" w:semiHidden="0" w:name="Table List 7"/><w:lsdException w:unhideWhenUsed="0" w:uiPriority="0" w:semiHidden="0" w:name="Table List 8"/><w:lsdException w:unhideWhenUsed="0" w:uiPriority="0" w:semiHidden="0" w:name="Table 3D effects 1"/><w:lsdException w:unhideWhenUsed="0" w:uiPriority="0" w:semiHidden="0" w:name="Table 3D effects 2"/><w:lsdException w:unhideWhenUsed="0" w:uiPriority="0" w:semiHidden="0" w:name="Table 3D effects 3"/><w:lsdException w:unhideWhenUsed="0" w:uiPriority="0" w:semiHidden="0" w:name="Table Contemporary"/><w:lsdException w:unhideWhenUsed="0" w:uiPriority="0" w:semiHidden="0" w:name="Table Elegant"/><w:lsdException w:unhideWhenUsed="0" w:uiPriority="0" w:semiHidden="0" w:name="Table Professional"/><w:lsdException w:unhideWhenUsed="0" w:uiPriority="0" w:semiHidden="0" w:name="Table Subtle 1"/><w:lsdException w:unhideWhenUsed="0" w:uiPriority="0" w:semiHidden="0" w:name="Table Subtle 2"/><w:lsdException w:unhideWhenUsed="0" w:uiPriority="0" w:semiHidden="0" w:name="Table Web 1"/><w:lsdException w:unhideWhenUsed="0" w:uiPriority="0" w:semiHidden="0" w:name="Table Web 2"/><w:lsdException w:unhideWhenUsed="0" w:uiPriority="0" w:semiHidden="0" w:name="Table Web 3"/><w:lsdException w:unhideWhenUsed="0" w:uiPriority="0" w:semiHidden="0" w:name="Balloon Text"/><w:lsdException w:unhideWhenUsed="0" w:uiPriority="0" w:semiHidden="0" w:name="Table Grid"/><w:lsdException w:unhideWhenUsed="0" w:uiPriority="0" w:semiHidden="0" w:name="Table Theme"/><w:lsdException w:unhideWhenUsed="0" w:uiPriority="60" w:semiHidden="0" w:name="Light Shading"/><w:lsdException w:unhideWhenUsed="0" w:uiPriority="61" w:semiHidden="0" w:name="Light List"/><w:lsdException w:unhideWhenUsed="0" w:uiPriority="62" w:semiHidden="0" w:name="Light Grid"/><w:lsdException w:unhideWhenUsed="0" w:uiPriority="63" w:semiHidden="0" w:name="Medium Shading 1"/><w:lsdException w:unhideWhenUsed="0" w:uiPriority="64" w:semiHidden="0" w:name="Medium Shading 2"/><w:lsdException w:unhideWhenUsed="0" w:uiPriority="65" w:semiHidden="0" w:name="Medium List 1"/><w:lsdException w:unhideWhenUsed="0" w:uiPriority="66" w:semiHidden="0" w:name="Medium List 2"/><w:lsdException w:unhideWhenUsed="0" w:uiPriority="67" w:semiHidden="0" w:name="Medium Grid 1"/><w:lsdException w:unhideWhenUsed="0" w:uiPriority="68" w:semiHidden="0" w:name="Medium Grid 2"/><w:lsdException w:unhideWhenUsed="0" w:uiPriority="69" w:semiHidden="0" w:name="Medium Grid 3"/><w:lsdException w:unhideWhenUsed="0" w:uiPriority="70" w:semiHidden="0" w:name="Dark List"/><w:lsdException w:unhideWhenUsed="0" w:uiPriority="71" w:semiHidden="0" w:name="Colorful Shading"/><w:lsdException w:unhideWhenUsed="0" w:uiPriority="72" w:semiHidden="0" w:name="Colorful List"/><w:lsdException w:unhideWhenUsed="0" w:uiPriority="73" w:semiHidden="0" w:name="Colorful Grid"/><w:lsdException w:unhideWhenUsed="0" w:uiPriority="60" w:semiHidden="0" w:name="Light Shading Accent 1"/><w:lsdException w:unhideWhenUsed="0" w:uiPriority="61" w:semiHidden="0" w:name="Light List Accent 1"/><w:lsdException w:unhideWhenUsed="0" w:uiPriority="62" w:semiHidden="0" w:name="Light Grid Accent 1"/><w:lsdException w:unhideWhenUsed="0" w:uiPriority="63" w:semiHidden="0" w:name="Medium Shading 1 Accent 1"/><w:lsdException w:unhideWhenUsed="0" w:uiPriority="64" w:semiHidden="0" w:name="Medium Shading 2 Accent 1"/><w:lsdException w:unhideWhenUsed="0" w:uiPriority="65" w:semiHidden="0" w:name="Medium List 1 Accent 1"/><w:lsdException w:unhideWhenUsed="0" w:uiPriority="66" w:semiHidden="0" w:name="Medium List 2 Accent 1"/><w:lsdException w:unhideWhenUsed="0" w:uiPriority="67" w:semiHidden="0" w:name="Medium Grid 1 Accent 1"/><w:lsdException w:unhideWhenUsed="0" w:uiPriority="68" w:semiHidden="0" w:name="Medium Grid 2 Accent 1"/><w:lsdException w:unhideWhenUsed="0" w:uiPriority="69" w:semiHidden="0" w:name="Medium Grid 3 Accent 1"/><w:lsdException w:unhideWhenUsed="0" w:uiPriority="70" w:semiHidden="0" w:name="Dark List Accent 1"/><w:lsdException w:unhideWhenUsed="0" w:uiPriority="71" w:semiHidden="0" w:name="Colorful Shading Accent 1"/><w:lsdException w:unhideWhenUsed="0" w:uiPriority="72" w:semiHidden="0" w:name="Colorful List Accent 1"/><w:lsdException w:unhideWhenUsed="0" w:uiPriority="73" w:semiHidden="0" w:name="Colorful Grid Accent 1"/><w:lsdException w:unhideWhenUsed="0" w:uiPriority="60" w:semiHidden="0" w:name="Light Shading Accent 2"/><w:lsdException w:unhideWhenUsed="0" w:uiPriority="61" w:semiHidden="0" w:name="Light List Accent 2"/><w:lsdException w:unhideWhenUsed="0" w:uiPriority="62" w:semiHidden="0" w:name="Light Grid Accent 2"/><w:lsdException w:unhideWhenUsed="0" w:uiPriority="63" w:semiHidden="0" w:name="Medium Shading 1 Accent 2"/><w:lsdException w:unhideWhenUsed="0" w:uiPriority="64" w:semiHidden="0" w:name="Medium Shading 2 Accent 2"/><w:lsdException w:unhideWhenUsed="0" w:uiPriority="65" w:semiHidden="0" w:name="Medium List 1 Accent 2"/><w:lsdException w:unhideWhenUsed="0" w:uiPriority="66" w:semiHidden="0" w:name="Medium List 2 Accent 2"/><w:lsdException w:unhideWhenUsed="0" w:uiPriority="67" w:semiHidden="0" w:name="Medium Grid 1 Accent 2"/><w:lsdException w:unhideWhenUsed="0" w:uiPriority="68" w:semiHidden="0" w:name="Medium Grid 2 Accent 2"/><w:lsdException w:unhideWhenUsed="0" w:uiPriority="69" w:semiHidden="0" w:name="Medium Grid 3 Accent 2"/><w:lsdException w:unhideWhenUsed="0" w:uiPriority="70" w:semiHidden="0" w:name="Dark List Accent 2"/><w:lsdException w:unhideWhenUsed="0" w:uiPriority="71" w:semiHidden="0" w:name="Colorful Shading Accent 2"/><w:lsdException w:unhideWhenUsed="0" w:uiPriority="72" w:semiHidden="0" w:name="Colorful List Accent 2"/><w:lsdException w:unhideWhenUsed="0" w:uiPriority="73" w:semiHidden="0" w:name="Colorful Grid Accent 2"/><w:lsdException w:unhideWhenUsed="0" w:uiPriority="60" w:semiHidden="0" w:name="Light Shading Accent 3"/><w:lsdException w:unhideWhenUsed="0" w:uiPriority="61" w:semiHidden="0" w:name="Light List Accent 3"/><w:lsdException w:unhideWhenUsed="0" w:uiPriority="62" w:semiHidden="0" w:name="Light Grid Accent 3"/><w:lsdException w:unhideWhenUsed="0" w:uiPriority="63" w:semiHidden="0" w:name="Medium Shading 1 Accent 3"/><w:lsdException w:unhideWhenUsed="0" w:uiPriority="64" w:semiHidden="0" w:name="Medium Shading 2 Accent 3"/><w:lsdException w:unhideWhenUsed="0" w:uiPriority="65" w:semiHidden="0" w:name="Medium List 1 Accent 3"/><w:lsdException w:unhideWhenUsed="0" w:uiPriority="66" w:semiHidden="0" w:name="Medium List 2 Accent 3"/><w:lsdException w:unhideWhenUsed="0" w:uiPriority="67" w:semiHidden="0" w:name="Medium Grid 1 Accent 3"/><w:lsdException w:unhideWhenUsed="0" w:uiPriority="68" w:semiHidden="0" w:name="Medium Grid 2 Accent 3"/><w:lsdException w:unhideWhenUsed="0" w:uiPriority="69" w:semiHidden="0" w:name="Medium Grid 3 Accent 3"/><w:lsdException w:unhideWhenUsed="0" w:uiPriority="70" w:semiHidden="0" w:name="Dark List Accent 3"/><w:lsdException w:unhideWhenUsed="0" w:uiPriority="71" w:semiHidden="0" w:name="Colorful Shading Accent 3"/><w:lsdException w:unhideWhenUsed="0" w:uiPriority="72" w:semiHidden="0" w:name="Colorful List Accent 3"/><w:lsdException w:unhideWhenUsed="0" w:uiPriority="73" w:semiHidden="0" w:name="Colorful Grid Accent 3"/><w:lsdException w:unhideWhenUsed="0" w:uiPriority="60" w:semiHidden="0" w:name="Light Shading Accent 4"/><w:lsdException w:unhideWhenUsed="0" w:uiPriority="61" w:semiHidden="0" w:name="Light List Accent 4"/><w:lsdException w:unhideWhenUsed="0" w:uiPriority="62" w:semiHidden="0" w:name="Light Grid Accent 4"/><w:lsdException w:unhideWhenUsed="0" w:uiPriority="63" w:semiHidden="0" w:name="Medium Shading 1 Accent 4"/><w:lsdException w:unhideWhenUsed="0" w:uiPriority="64" w:semiHidden="0" w:name="Medium Shading 2 Accent 4"/><w:lsdException w:unhideWhenUsed="0" w:uiPriority="65" w:semiHidden="0" w:name="Medium List 1 Accent 4"/><w:lsdException w:unhideWhenUsed="0" w:uiPriority="66" w:semiHidden="0" w:name="Medium List 2 Accent 4"/><w:lsdException w:unhideWhenUsed="0" w:uiPriority="67" w:semiHidden="0" w:name="Medium Grid 1 Accent 4"/><w:lsdException w:unhideWhenUsed="0" w:uiPriority="68" w:semiHidden="0" w:name="Medium Grid 2 Accent 4"/><w:lsdException w:unhideWhenUsed="0" w:uiPriority="69" w:semiHidden="0" w:name="Medium Grid 3 Accent 4"/><w:lsdException w:unhideWhenUsed="0" w:uiPriority="70" w:semiHidden="0" w:name="Dark List Accent 4"/><w:lsdException w:unhideWhenUsed="0" w:uiPriority="71" w:semiHidden="0" w:name="Colorful Shading Accent 4"/><w:lsdException w:unhideWhenUsed="0" w:uiPriority="72" w:semiHidden="0" w:name="Colorful List Accent 4"/><w:lsdException w:unhideWhenUsed="0" w:uiPriority="73" w:semiHidden="0" w:name="Colorful Grid Accent 4"/><w:lsdException w:unhideWhenUsed="0" w:uiPriority="60" w:semiHidden="0" w:name="Light Shading Accent 5"/><w:lsdException w:unhideWhenUsed="0" w:uiPriority="61" w:semiHidden="0" w:name="Light List Accent 5"/><w:lsdException w:unhideWhenUsed="0" w:uiPriority="62" w:semiHidden="0" w:name="Light Grid Accent 5"/><w:lsdException w:unhideWhenUsed="0" w:uiPriority="63" w:semiHidden="0" w:name="Medium Shading 1 Accent 5"/><w:lsdException w:unhideWhenUsed="0" w:uiPriority="64" w:semiHidden="0" w:name="Medium Shading 2 Accent 5"/><w:lsdException w:unhideWhenUsed="0" w:uiPriority="65" w:semiHidden="0" w:name="Medium List 1 Accent 5"/><w:lsdException w:unhideWhenUsed="0" w:uiPriority="66" w:semiHidden="0" w:name="Medium List 2 Accent 5"/><w:lsdException w:unhideWhenUsed="0" w:uiPriority="67" w:semiHidden="0" w:name="Medium Grid 1 Accent 5"/><w:lsdException w:unhideWhenUsed="0" w:uiPriority="68" w:semiHidden="0" w:name="Medium Grid 2 Accent 5"/><w:lsdException w:unhideWhenUsed="0" w:uiPriority="69" w:semiHidden="0" w:name="Medium Grid 3 Accent 5"/><w:lsdException w:unhideWhenUsed="0" w:uiPriority="70" w:semiHidden="0" w:name="Dark List Accent 5"/><w:lsdException w:unhideWhenUsed="0" w:uiPriority="71" w:semiHidden="0" w:name="Colorful Shading Accent 5"/><w:lsdException w:unhideWhenUsed="0" w:uiPriority="72" w:semiHidden="0" w:name="Colorful List Accent 5"/><w:lsdException w:unhideWhenUsed="0" w:uiPriority="73" w:semiHidden="0" w:name="Colorful Grid Accent 5"/><w:lsdException w:unhideWhenUsed="0" w:uiPriority="60" w:semiHidden="0" w:name="Light Shading Accent 6"/><w:lsdException w:unhideWhenUsed="0" w:uiPriority="61" w:semiHidden="0" w:name="Light List Accent 6"/><w:lsdException w:unhideWhenUsed="0" w:uiPriority="62" w:semiHidden="0" w:name="Light Grid Accent 6"/><w:lsdException w:unhideWhenUsed="0" w:uiPriority="63" w:semiHidden="0" w:name="Medium Shading 1 Accent 6"/><w:lsdException w:unhideWhenUsed="0" w:uiPriority="64" w:semiHidden="0" w:name="Medium Shading 2 Accent 6"/><w:lsdException w:unhideWhenUsed="0" w:uiPriority="65" w:semiHidden="0" w:name="Medium List 1 Accent 6"/><w:lsdException w:unhideWhenUsed="0" w:uiPriority="66" w:semiHidden="0" w:name="Medium List 2 Accent 6"/><w:lsdException w:unhideWhenUsed="0" w:uiPriority="67" w:semiHidden="0" w:name="Medium Grid 1 Accent 6"/><w:lsdException w:unhideWhenUsed="0" w:uiPriority="68" w:semiHidden="0" w:name="Medium Grid 2 Accent 6"/><w:lsdException w:unhideWhenUsed="0" w:uiPriority="69" w:semiHidden="0" w:name="Medium Grid 3 Accent 6"/><w:lsdException w:unhideWhenUsed="0" w:uiPriority="70" w:semiHidden="0" w:name="Dark List Accent 6"/><w:lsdException w:unhideWhenUsed="0" w:uiPriority="71" w:semiHidden="0" w:name="Colorful Shading Accent 6"/><w:lsdException w:unhideWhenUsed="0" w:uiPriority="72" w:semiHidden="0" w:name="Colorful List Accent 6"/><w:lsdException w:unhideWhenUsed="0" w:uiPriority="73" w:semiHidden="0" w:name="Colorful Grid Accent 6"/></w:latentStyles><w:style w:type="paragraph" w:default="1" w:styleId="1"><w:name w:val="Normal"/><w:qFormat/><w:uiPriority w:val="0"/><w:pPr><w:widowControl w:val="0"/><w:ind w:firstLine="561" w:firstLineChars="200"/><w:jc w:val="both"/></w:pPr><w:rPr><w:rFonts w:eastAsia="宋体" w:asciiTheme="minorAscii" w:hAnsiTheme="minorAscii" w:cstheme="minorBidi"/><w:kern w:val="2"/><w:sz w:val="21"/><w:szCs w:val="24"/><w:lang w:val="en-US" w:eastAsia="zh-CN" w:bidi="ar-SA"/></w:rPr></w:style><w:style w:type="paragraph" w:styleId="2"><w:name w:val="heading 1"/><w:basedOn w:val="1"/><w:next w:val="1"/><w:qFormat/><w:uiPriority w:val="0"/><w:pPr><w:spacing w:before="0" w:beforeAutospacing="1" w:after="0" w:afterAutospacing="1"/><w:jc w:val="left"/><w:outlineLvl w:val="0"/></w:pPr><w:rPr><w:rFonts w:hint="eastAsia" w:ascii="宋体" w:hAnsi="宋体" w:eastAsia="宋体" w:cs="宋体"/><w:b/><w:bCs/><w:snapToGrid w:val="0"/><w:kern w:val="0"/><w:sz w:val="28"/><w:szCs w:val="48"/><w:lang w:bidi="ar"/></w:rPr></w:style><w:style w:type="paragraph" w:styleId="3"><w:name w:val="heading 2"/><w:basedOn w:val="1"/><w:next w:val="1"/><w:semiHidden/><w:unhideWhenUsed/><w:qFormat/><w:uiPriority w:val="0"/><w:pPr><w:spacing w:before="0" w:beforeAutospacing="1" w:after="0" w:afterAutospacing="1" w:line="240" w:lineRule="auto"/><w:ind w:firstLine="0" w:firstLineChars="0"/><w:jc w:val="left"/><w:outlineLvl w:val="1"/></w:pPr><w:rPr><w:rFonts w:hint="eastAsia" w:ascii="宋体" w:hAnsi="宋体" w:cs="宋体"/><w:b/><w:bCs/><w:snapToGrid w:val="0"/><w:kern w:val="0"/><w:sz w:val="24"/><w:szCs w:val="36"/><w:lang w:bidi="ar"/></w:rPr></w:style><w:style w:type="paragraph" w:styleId="4"><w:name w:val="heading 3"/><w:basedOn w:val="1"/><w:next w:val="1"/><w:semiHidden/><w:unhideWhenUsed/><w:qFormat/><w:uiPriority w:val="0"/><w:pPr><w:spacing w:before="0" w:beforeAutospacing="1" w:after="0" w:afterAutospacing="1"/><w:jc w:val="left"/><w:outlineLvl w:val="2"/></w:pPr><w:rPr><w:rFonts w:hint="eastAsia" w:ascii="宋体" w:hAnsi="宋体" w:eastAsia="宋体" w:cs="宋体"/><w:snapToGrid w:val="0"/><w:kern w:val="0"/><w:sz w:val="24"/><w:szCs w:val="27"/><w:lang w:bidi="ar"/></w:rPr></w:style><w:style w:type="character" w:default="1" w:styleId="8"><w:name w:val="Default Paragraph Font"/><w:semiHidden/><w:qFormat/><w:uiPriority w:val="0"/></w:style><w:style w:type="table" w:default="1" w:styleId="7"><w:name w:val="Normal Table"/><w:semiHidden/><w:qFormat/><w:uiPriority w:val="0"/><w:tblPr><w:tblCellMar><w:top w:w="0" w:type="dxa"/><w:left w:w="108" w:type="dxa"/><w:bottom w:w="0" w:type="dxa"/><w:right w:w="108" w:type="dxa"/></w:tblCellMar></w:tblPr></w:style><w:style w:type="paragraph" w:styleId="5"><w:name w:val="footer"/><w:basedOn w:val="1"/><w:uiPriority w:val="0"/><w:pPr><w:tabs><w:tab w:val="center" w:pos="4153"/><w:tab w:val="right" w:pos="8306"/></w:tabs><w:snapToGrid w:val="0"/><w:jc w:val="left"/></w:pPr><w:rPr><w:sz w:val="18"/></w:rPr></w:style><w:style w:type="paragraph" w:styleId="6"><w:name w:val="header"/><w:basedOn w:val="1"/><w:uiPriority w:val="0"/><w:pPr><w:pBdr><w:top w:val="none" w:color="auto" w:sz="0" w:space="1"/><w:left w:val="none" w:color="auto" w:sz="0" w:space="4"/><w:bottom w:val="none" w:color="auto" w:sz="0" w:space="1"/><w:right w:val="none" w:color="auto" w:sz="0" w:space="4"/></w:pBdr><w:tabs><w:tab w:val="center" w:pos="4153"/><w:tab w:val="right" w:pos="8306"/></w:tabs><w:snapToGrid w:val="0"/><w:spacing w:line="240" w:lineRule="auto"/><w:jc w:val="both"/><w:outlineLvl w:val="9"/></w:pPr><w:rPr><w:sz w:val="18"/></w:rPr></w:style></w:styles>
