# Supplementary material for: From Cultural Symbols to User Value Construction:A Grounded Theory Study of Heritage-Based Creative Products
Source: Research Square preprint supplement (doi:10.21203/rs.3.rs-8448462/v1), 2026-01-29
Supplement: Supplementary file 5 [file 9929b1f76f139695b7d89aa9.docx › word/theme/theme1.xml]

<?xml version="1.0" encoding="UTF-8" standalone="yes"?>
<a:theme xmlns:a="http://schemas.openxmlformats.org/drawingml/2006/main" name="WPS"><a:themeElements><a:clrScheme name="WPS"><a:dk1><a:sysClr val="windowText" lastClr="000000"/></a:dk1><a:lt1><a:sysClr val="window" lastClr="FFFFFF"/></a:lt1><a:dk2><a:srgbClr val="44546A"/></a:dk2><a:lt2><a:srgbClr val="E7E6E6"/></a:lt2><a:accent1><a:srgbClr val="4874CB"/></a:accent1><a:accent2><a:srgbClr val="EE822F"/></a:accent2><a:accent3><a:srgbClr val="F2BA02"/></a:accent3><a:accent4><a:srgbClr val="75BD42"/></a:accent4><a:accent5><a:srgbClr val="30C0B4"/></a:accent5><a:accent6><a:srgbClr val="E54C5E"/></a:accent6><a:hlink><a:srgbClr val="0026E5"/></a:hlink><a:folHlink><a:srgbClr val="7E1FAD"/></a:folHlink></a:clrScheme><a:fontScheme name="WPS"><a:majorFont><a:latin typeface="Calibri Light"/><a:ea typeface=""/><a:cs typeface=""/><a:font script="Jpan" typeface="ＭＳ ゴシック"/><a:font script="Hang" typeface="맑은 고딕"/><a:font script="Hans" typeface="宋体"/><a:font script="Hant" typeface="新細明體"/><a:font script="Arab" typeface="Times New Roman"/><a:font script="Hebr" typeface="Times New Roman"/><a:font script="Thai" typeface="Angsana New"/><a:font script="Ethi" typeface="Nyala"/><a:font script="Beng" typeface="Vrinda"/><a:font script="Gujr" typeface="Shruti"/><a:font script="Khmr" typeface="MoolBoran"/><a:font script="Knda" typeface="Tunga"/><a:font script="Guru" typeface="Raavi"/><a:font script="Cans" typeface="Euphemia"/><a:font script="Cher" typeface="Plantagenet Cherokee"/><a:font script="Yiii" typeface="Microsoft Yi Baiti"/><a:font script="Tibt" typeface="Microsoft Himalaya"/><a:font script="Thaa" typeface="MV Boli"/><a:font script="Deva" typeface="Mangal"/><a:font script="Telu" typeface="Gautami"/><a:font script="Taml" typeface="Latha"/><a:font script="Syrc" typeface="Estrangelo Edessa"/><a:font script="Orya" typeface="Kalinga"/><a:font script="Mlym" typeface="Kartika"/><a:font script="Laoo" typeface="DokChampa"/><a:font script="Sinh" typeface="Iskoola Pota"/><a:font script="Mong" typeface="Mongolian Baiti"/><a:font script="Viet" typeface="Times New Roman"/><a:font script="Uigh" typeface="Microsoft Uighur"/><a:font script="Geor" typeface="Sylfaen"/></a:majorFont><a:minorFont><a:latin typeface="Calibri"/><a:ea typeface=""/><a:cs typeface=""/><a:font script="Jpan" typeface="ＭＳ 明朝"/><a:font script="Hang" typeface="맑은 고딕"/><a:font script="Hans" typeface="宋体"/><a:font script="Hant" typeface="新細明體"/><a:font script="Arab" typeface="Arial"/><a:font script="Hebr" typeface="Arial"/><a:font script="Thai" typeface="Cordia New"/><a:font script="Ethi" typeface="Nyala"/><a:font script="Beng" typeface="Vrinda"/><a:font script="Gujr" typeface="Shruti"/><a:font script="Khmr" typeface="DaunPenh"/><a:font script="Knda" typeface="Tunga"/><a:font script="Guru" typeface="Raavi"/><a:font script="Cans" typeface="Euphemia"/><a:font script="Cher" typeface="Plantagenet Cherokee"/><a:font script="Yiii" typeface="Microsoft Yi Baiti"/><a:font script="Tibt" typeface="Microsoft Himalaya"/><a:font script="Thaa" typeface="MV Boli"/><a:font script="Deva" typeface="Mangal"/><a:font script="Telu" typeface="Gautami"/><a:font script="Taml" typeface="Latha"/><a:font script="Syrc" typeface="Estrangelo Edessa"/><a:font script="Orya" typeface="Kalinga"/><a:font script="Mlym" typeface="Kartika"/><a:font script="Laoo" typeface="DokChampa"/><a:font script="Sinh" typeface="Iskoola Pota"/><a:font script="Mong" typeface="Mongolian Baiti"/><a:font script="Viet" typeface="Arial"/><a:font script="Uigh" typeface="Microsoft Uighur"/><a:font script="Geor" typeface="Sylfaen"/></a:minorFont></a:fontScheme><a:fmtScheme name="WPS"><a:fillStyleLst><a:solidFill><a:schemeClr val="phClr"/></a:solidFill><a:gradFill><a:gsLst><a:gs pos="0"><a:schemeClr val="phClr"><a:lumOff val="17500"/></a:schemeClr></a:gs><a:gs pos="100000"><a:schemeClr val="phClr"/></a:gs></a:gsLst><a:lin ang="2700000" scaled="0"/></a:gradFill><a:gradFill><a:gsLst><a:gs pos="0"><a:schemeClr val="phClr"><a:hueOff val="-2520000"/></a:schemeClr></a:gs><a:gs pos="100000"><a:schemeClr val="phClr"/></a:gs></a:gsLst><a:lin ang="2700000" scaled="0"/></a:gradFill></a:fillStyleLst><a:lnStyleLst><a:ln w="12700" cap="flat" cmpd="sng" algn="ctr"><a:solidFill><a:schemeClr val="phClr"/></a:solidFill><a:prstDash val="solid"/><a:miter lim="800000"/></a:ln><a:ln w="12700" cap="flat" cmpd="sng" algn="ctr"><a:solidFill><a:schemeClr val="phClr"/></a:solidFill><a:prstDash val="solid"/><a:miter lim="800000"/></a:ln><a:ln w="12700" cap="flat" cmpd="sng" algn="ctr"><a:gradFill><a:gsLst><a:gs pos="0"><a:schemeClr val="phClr"><a:hueOff val="-4200000"/></a:schemeClr></a:gs><a:gs pos="100000"><a:schemeClr val="phClr"/></a:gs></a:gsLst><a:lin ang="2700000" scaled="1"/></a:gradFill><a:prstDash val="solid"/><a:miter lim="800000"/></a:ln></a:lnStyleLst><a:effectStyleLst><a:effectStyle><a:effectLst><a:outerShdw blurRad="101600" dist="50800" dir="5400000" algn="ctr" rotWithShape="0"><a:schemeClr val="phClr"><a:alpha val="60000"/></a:schemeClr></a:outerShdw></a:effectLst></a:effectStyle><a:effectStyle><a:effectLst><a:reflection stA="50000" endA="300" endPos="40000" dist="25400" dir="5400000" sy="-100000" algn="bl" rotWithShape="0"/></a:effectLst></a:effectStyle><a:effectStyle><a:effectLst><a:outerShdw blurRad="57150" dist="19050" dir="5400000" algn="ctr" rotWithShape="0"><a:srgbClr val="000000"><a:alpha val="63000"/></a:srgbClr></a:outerShdw></a:effectLst></a:effectStyle></a:effectStyleLst><a:bgFillStyleLst><a:solidFill><a:schemeClr val="phClr"/></a:solidFill><a:solidFill><a:schemeClr val="phClr"><a:tint val="95000"/><a:satMod val="170000"/></a:schemeClr></a:solidFill><a:gradFill rotWithShape="1"><a:gsLst><a:gs pos="0"><a:schemeClr val="phClr"><a:tint val="93000"/><a:satMod val="150000"/><a:shade val="98000"/><a:lumMod val="102000"/></a:schemeClr></a:gs><a:gs pos="50000"><a:schemeClr val="phClr"><a:tint val="98000"/><a:satMod val="130000"/><a:shade val="90000"/><a:lumMod val="103000"/></a:schemeClr></a:gs><a:gs pos="100000"><a:schemeClr val="phClr"><a:shade val="63000"/><a:satMod val="120000"/></a:schemeClr></a:gs></a:gsLst><a:lin ang="5400000" scaled="0"/></a:gradFill></a:bgFillStyleLst></a:fmtScheme></a:themeElements><a:objectDefaults/></a:theme>
